# Supplementary material for: Isolation, Characterization and Antiproliferative Activity of New Metabolites from the South African Endemic Red Algal Species Laurencia alfredensis
Source: PubMed Central journal article supplement (PMC6154597; doi:10.3390/molecules22040513), 2017-03-23
Supplement: molecules-22-00513-s001.pdf [file molecules-22-00513-s001.pdf]

# Supplementary Materials: Isolation, characterization and antiproliferative activity of new metabolites from the South African endemic red algal species *Laurencia alfredensis*

Godwin A. Dziwornu, Mino R. Caira, Jo-Anne de la Mare, Adrienne L. Edkins, John J. Bolton, Denzil R. Beukes, Suthananda N. Sunassee

Table of Contents:

**Scheme S1.** Isolation of compounds **1 – 11** from *Laurencia alfredensis*

**Figure S1.** The structures of compounds **1 – 11** isolated from *Laurencia alfredensis*.

**Figure S2.** <sup>1</sup>H-NMR spectrum (600MHz, CDCl<sub>3</sub>, 303K) of compound **1**

**Figure S3.** <sup>13</sup>C-NMR spectrum (150MHz, CDCl<sub>3</sub>, 303K) of compound **1**

**Figure S4.** <sup>1</sup>H-<sup>1</sup>H COSY NMR spectrum (600MHz, CDCl<sub>3</sub>, 303K) of compound **1**

**Figure S5.** HSQC-DEPT NMR spectrum (600MHz, CDCl<sub>3</sub>, 303K) of compound **1**

**Figure S6.** HMBC NMR spectrum (600MHz, CDCl<sub>3</sub>, 303K) of compound **1**

**Figure S7.** ROESY NMR spectrum (600MHz, CDCl<sub>3</sub>, 303K) of compound **1**

**Figure S8.** <sup>1</sup>H NMR spectrum (600MHz, CDCl<sub>3</sub>, 303K) of compound **2**

**Figure S9.** <sup>13</sup>C NMR spectrum (150MHz, CDCl<sub>3</sub>, 303K) of compound **2**

**Figure S10.** <sup>1</sup>H-<sup>1</sup>H COSY NMR spectrum (600MHz, CDCl<sub>3</sub>, 303K) of compound **2**

**Figure S11.** HSQC-DEPT NMR spectrum (600MHz, CDCl<sub>3</sub>, 303K) of compound **2**

**Figure S12.** HMBC NMR spectrum (600MHz, CDCl<sub>3</sub>, 303K) of compound **2**

**Figure S13.** ROESY NMR spectrum (600MHz, CDCl<sub>3</sub>, 303K) of compound **2**

**Figure S14.** <sup>1</sup>H NMR spectrum (600MHz, CDCl<sub>3</sub>, 303K) of compound **3**

**Figure S15.** <sup>13</sup>C NMR spectrum (150MHz, CDCl<sub>3</sub>, 303K) of compound **3**

**Figure S16.** <sup>1</sup>H-<sup>1</sup>H COSY NMR spectrum (600MHz, CDCl<sub>3</sub>, 303K) of compound **3**

**Figure S17.** HSQC-DEPT NMR spectrum (600MHz, CDCl<sub>3</sub>, 303K) of compound **3**

**Figure S18.** HMBC NMR spectrum (600MHz, CDCl<sub>3</sub>, 303K) of compound **3**

**Figure S19.** <sup>1</sup>H NMR spectrum (600MHz, CDCl<sub>3</sub>, 303K) of compound **4**

**Figure S20.** <sup>13</sup>C NMR spectrum (150MHz, CDCl<sub>3</sub>, 303K) of compound **4**

**Figure S21.** <sup>1</sup>H-<sup>1</sup>H COSY NMR spectrum (600MHz, CDCl<sub>3</sub>, 303K) of compound **4**

**Figure S22.** HSQC-DEPT NMR spectrum (600MHz, CDCl<sub>3</sub>, 303K) of compound **4**

**Figure S23.** HMBC NMR spectrum (600MHz, CDCl<sub>3</sub>, 303K) of compound **4**

**Figure S24.** ROESY NMR spectrum (600MHz, CDCl<sub>3</sub>, 303K) of compound **4**

**Figure S25.** <sup>1</sup>H NMR spectrum (600MHz, CDCl<sub>3</sub>, 303K) of compounds **5** and **6**

**Figure S26.** <sup>13</sup>C NMR spectrum (150MHz, CDCl<sub>3</sub>, 303K) of compounds **5** and **6**

**Figure S27.** <sup>1</sup>H-<sup>1</sup>H COSY NMR spectrum (600MHz, CDCl<sub>3</sub>, 303K) of compounds **5** and **6**

**Figure S28.** HSQC-DEPT NMR spectrum (600MHz, CDCl<sub>3</sub>, 303K) of compounds **5** and **6**

**Figure S29.** HMBC NMR spectrum (600MHz, CDCl<sub>3</sub>, 303K) of compounds **5** and **6**

**Figure S30.** ROESY NMR spectrum (600MHz, CDCl<sub>3</sub>, 303K) of compounds **5** and **6**

**Figure S31.** <sup>1</sup>H NMR spectrum (600MHz, CDCl<sub>3</sub>, 303K) of compound **7**

**Figure S32.** <sup>13</sup>C NMR spectrum (150MHz, CDCl<sub>3</sub>, 303K) of compound **7**

**Figure S33.** <sup>1</sup>H-<sup>1</sup>H COSY NMR spectrum (600MHz, CDCl<sub>3</sub>, 303K) of compound **7**

**Figure S34.** HSQC-DEPT NMR spectrum (600MHz, CDCl<sub>3</sub>, 303K) of compound **7**

**Figure S35.** HMBC NMR spectrum (600MHz, CDCl<sub>3</sub>, 303K) of compound **7**

**Figure S36.** ROESY NMR spectrum (600MHz, CDCl<sub>3</sub>, 303K) of compound **7**

**Figure S37.** <sup>1</sup>H NMR spectrum (600MHz, CDCl<sub>3</sub>, 303K) of compound **8**

**Figure S38.** <sup>13</sup>C NMR spectrum (150MHz, CDCl<sub>3</sub>, 303K) of compound **8**

**Figure S39.** <sup>1</sup>H-<sup>1</sup>H COSY NMR spectrum (600MHz, CDCl<sub>3</sub>, 303K) of compound **8**

**Figure S40.** HSQC-DEPT NMR spectrum (600MHz, CDCl<sub>3</sub>, 303K) of compound **8**

**Figure S41.** HMBC NMR spectrum (600MHz, CDCl<sub>3</sub>, 303K) of compound **8**

**Figure S42.** NOESY NMR spectrum (600MHz, CDCl<sub>3</sub>, 303K) of compound **8**

**Figure S43.** <sup>1</sup>H-NMR spectrum (600MHz, CDCl<sub>3</sub>, 303K) of compound **9**

**Figure S44.** <sup>13</sup>C-NMR spectrum (150MHz, CDCl<sub>3</sub>, 303K) of compound **9**

**Figure S45.** <sup>1</sup>H-<sup>1</sup>H COSY NMR spectrum (600MHz, CDCl<sub>3</sub>, 303K) of compound **9**

**Figure S46.** HSQC-DEPT NMR spectrum (600MHz, CDCl<sub>3</sub>, 303K) of compound **9**

**Figure S47.** HMBC NMR spectrum (600MHz, CDCl<sub>3</sub>, 303K) of compound **9**

**Figure S48.** ROESY NMR spectrum (600MHz, CDCl<sub>3</sub>, 303K) of compound **9**

**Figure S49.** <sup>1</sup>H-NMR spectrum (600MHz, CDCl<sub>3</sub>, 303K) of compound **10**

**Figure S50.** <sup>13</sup>C-NMR spectrum (150MHz, CDCl<sub>3</sub>, 303K) of compound **10**

**Figure S51.**  $^1\text{H}$ - $^1\text{H}$  COSY NMR spectrum (600MHz,  $\text{CDCl}_3$ , 303K) of compound **10**

**Figure S52.** HSQC-DEPT NMR spectrum (600MHz,  $\text{CDCl}_3$ , 303K) of compound **10**

**Figure S53.** HMBC NMR spectrum (600MHz,  $\text{CDCl}_3$ , 303K) of compound **10**

**Figure S54.** ROESY NMR spectrum (600MHz,  $\text{CDCl}_3$ , 303K) of compound **10**

**Figure S55.**  $^1\text{H}$ -NMR spectrum (600MHz,  $\text{DMSO-d}_6$ , 303K) of compound **11**

**Figure S56.**  $^{13}\text{C}$ -NMR spectrum (150MHz,  $\text{DMSO-d}_6$ , 303K) of compound **11**

**Figure S57.**  $^1\text{H}$ - $^1\text{H}$  COSY NMR spectrum (600MHz,  $\text{DMSO-d}_6$ , 303K) of compound **11**

**Figure S58.** HSQC-DEPT NMR spectrum (600MHz,  $\text{DMSO-d}_6$ , 303K) of compound **11**

**Figure S59.** HMBC NMR spectrum (600MHz,  $\text{DMSO-d}_6$ , 303K) of compound **11**

**Figure S60.** HR-ESI-MS spectrum of compound **1**

**Figure S61.** HR-ESI-MS spectrum of compound **2**

**Figure S62.** HR-ESI-MS spectrum of compound **3**

**Figure S63.** HR-ESI-MS spectrum of compound **5**

**Figure S64.** HR-ESI-MS spectrum of compound **6**

**Figure S65.** HR-ESI-MS spectrum of compound **7**

**Figure S66.** HR-ESI-MS spectrum of compound **8**

**Figure S67.** HR-ESI-MS spectrum of compound **9**

**Figure S68.** HR-ESI-MS spectrum of compound **10**

**Figure S69.** HR-ESI-MS spectrum of compound **11**

**Figure S70.** IR spectrum of compound **1**

**Figure S71.** IR spectrum of compound **2**

**Figure S72.** IR spectrum of compound **3**

**Figure S73.** IR spectrum of compound **7**

**Figure S74.** IR spectrum of compound **8**

**Figure S75.** IR spectrum of compound **10**

**Figure S76.** UV spectrum of compound **8**

**Figure S77.** UV spectrum of compound **10**

**Table S1.** Cytotoxicity assay data for compounds **1 - 10**

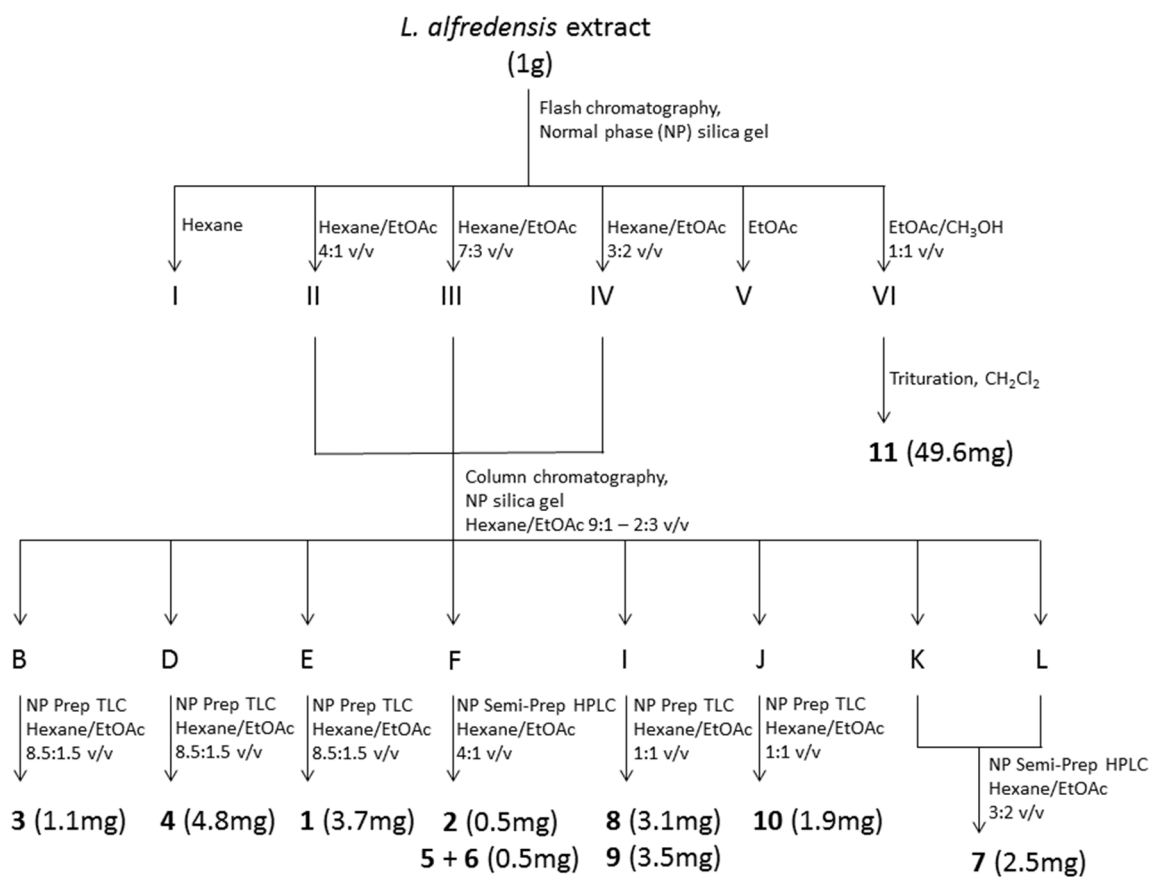

**Scheme S1.** Isolation of compounds **1 – 11** from *Laurencia alfredensis*

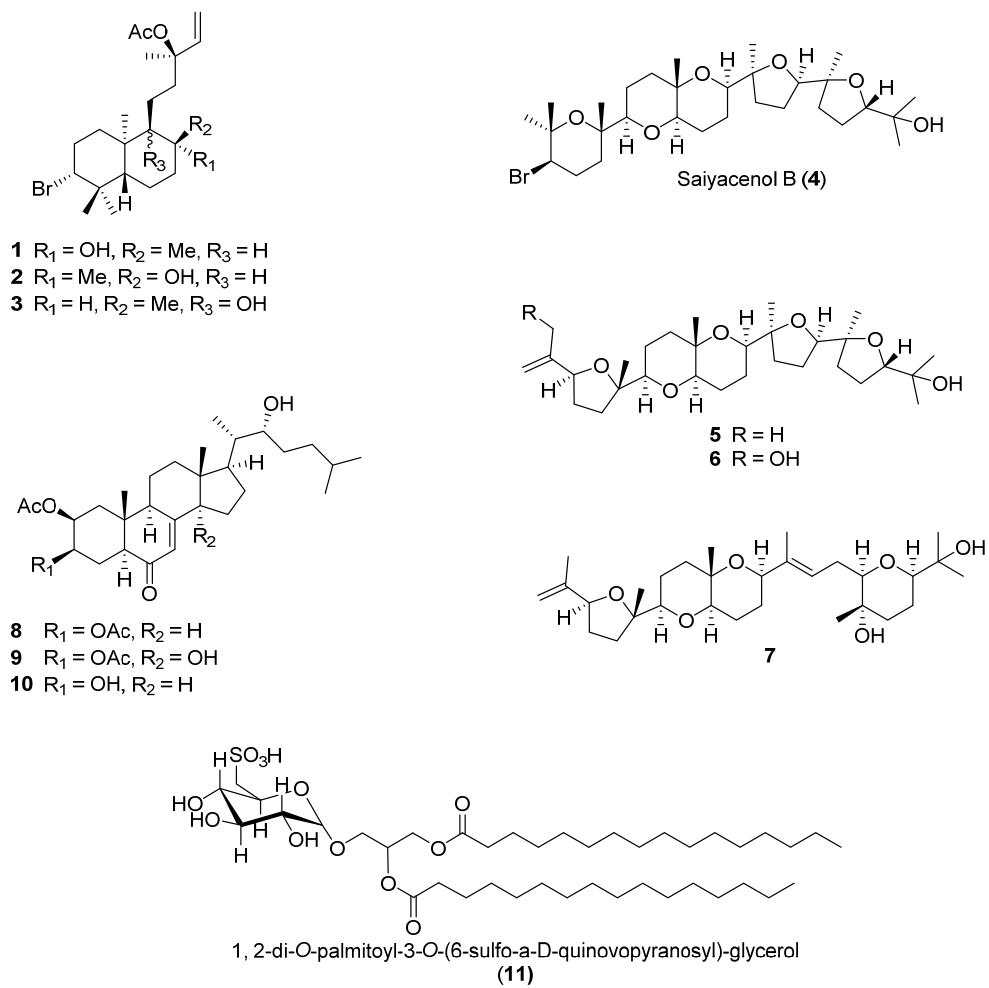

**Figure S1.** The structures of compounds **1** – **11** isolated from *Laurencia alfredensis*.

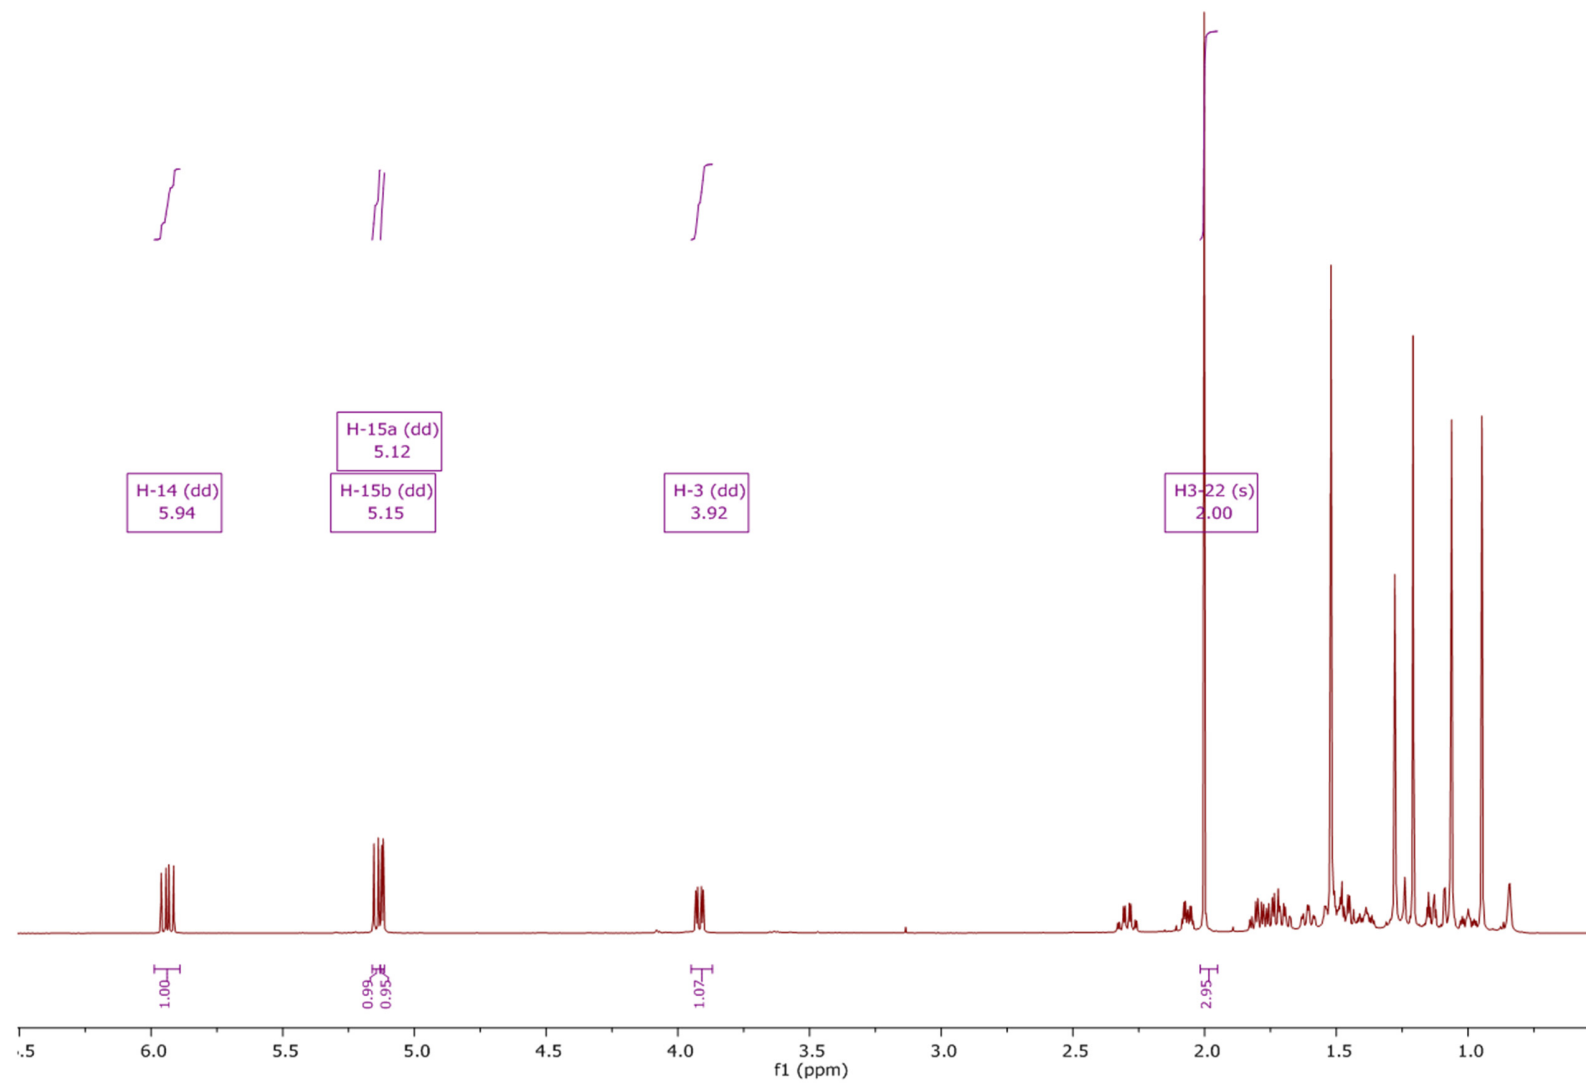

**Figure S2.** <sup>1</sup>H-NMR spectrum (600MHz, CDCl<sub>3</sub>, 303K) of compound **1**

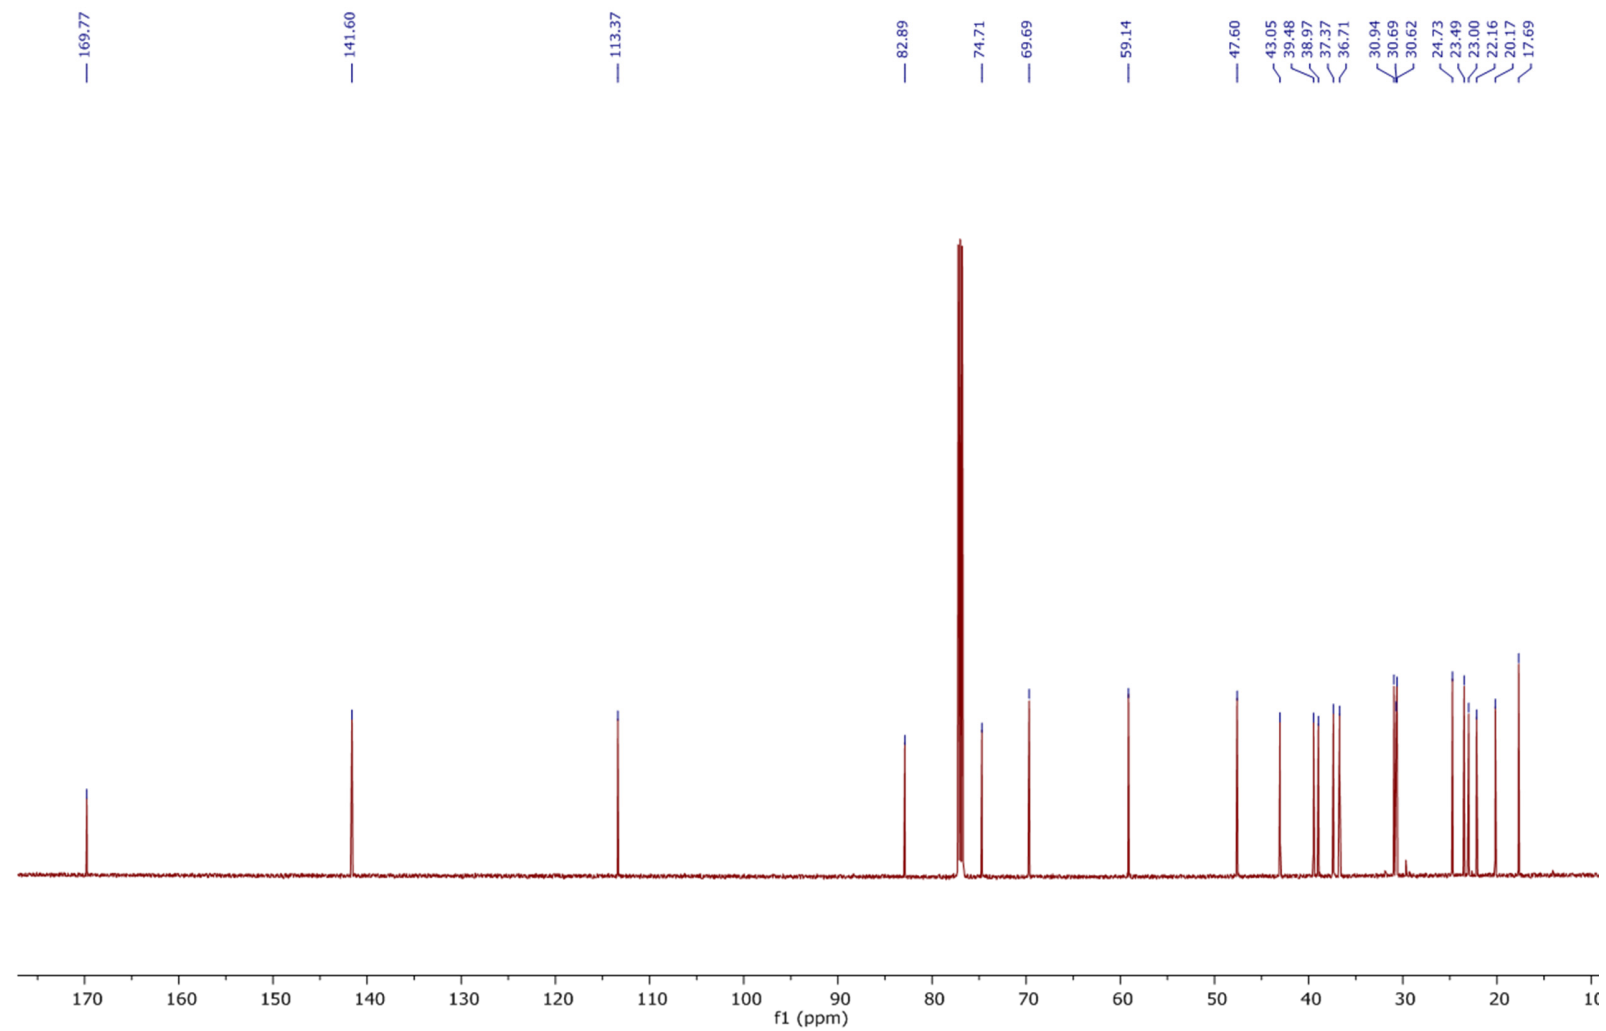

**Figure S3.**  $^{13}\text{C}$ -NMR spectrum (150MHz,  $\text{CDCl}_3$ , 303K) of compound 1

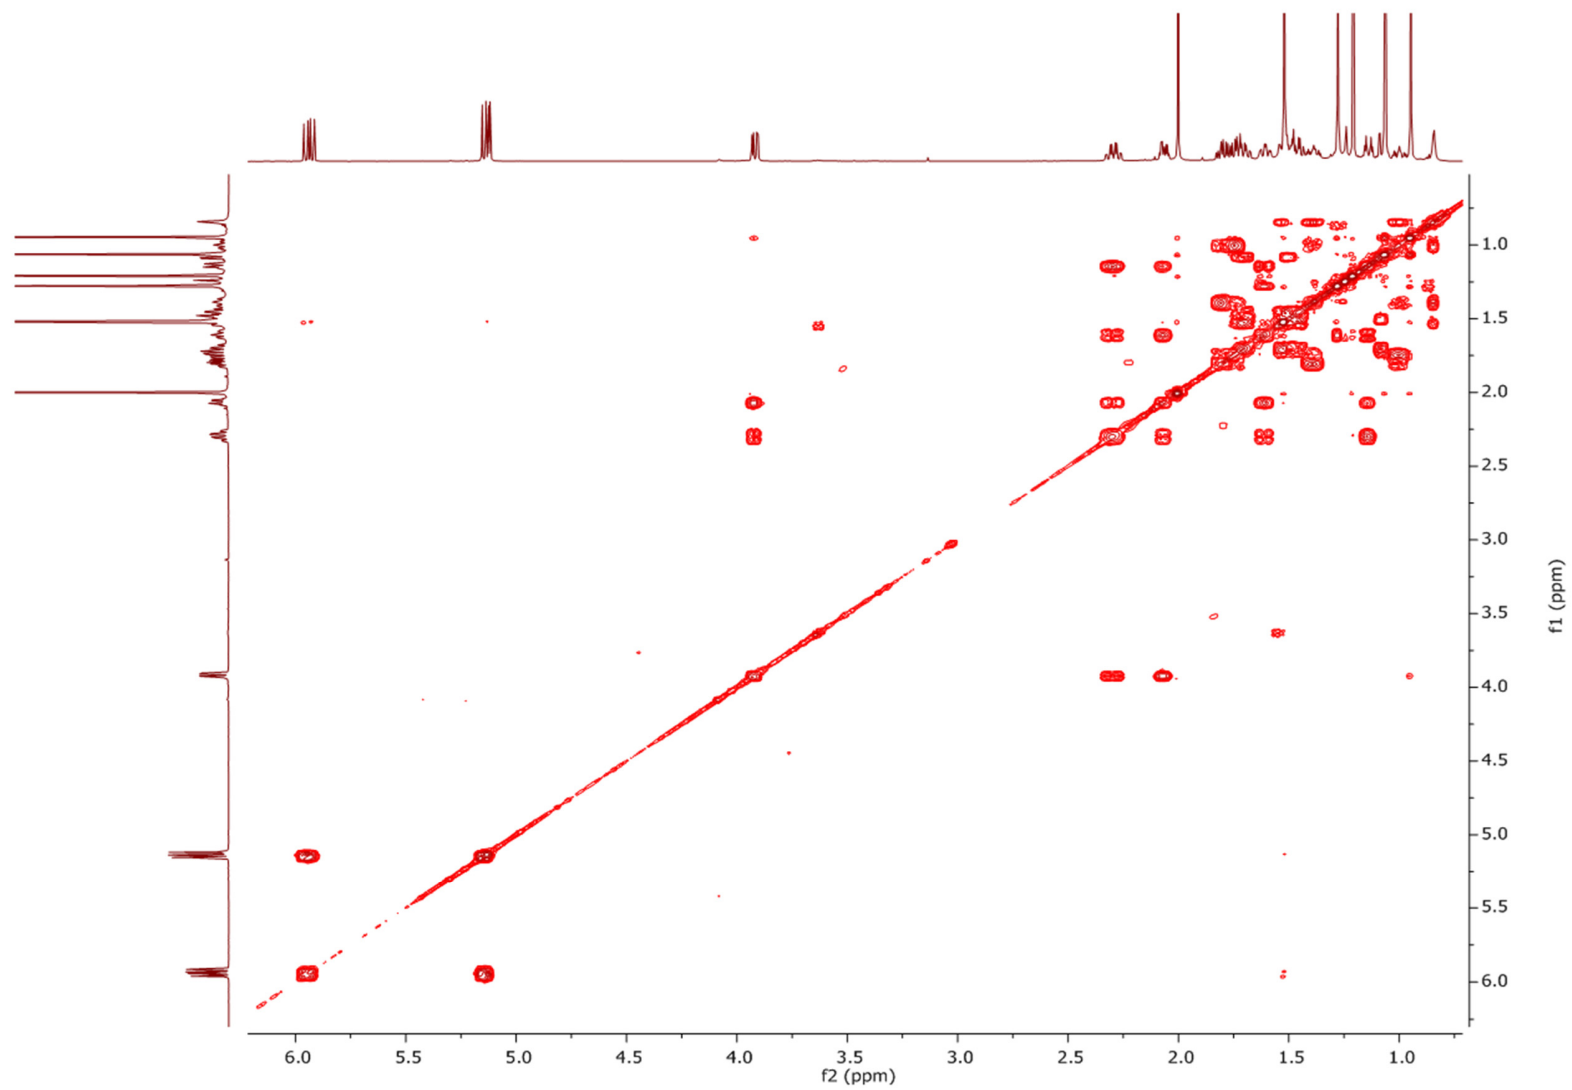

**Figure S4.**  $^1\text{H}$ - $^1\text{H}$  COSY spectrum (600MHz,  $\text{CDCl}_3$ , 303K) of compound **1**



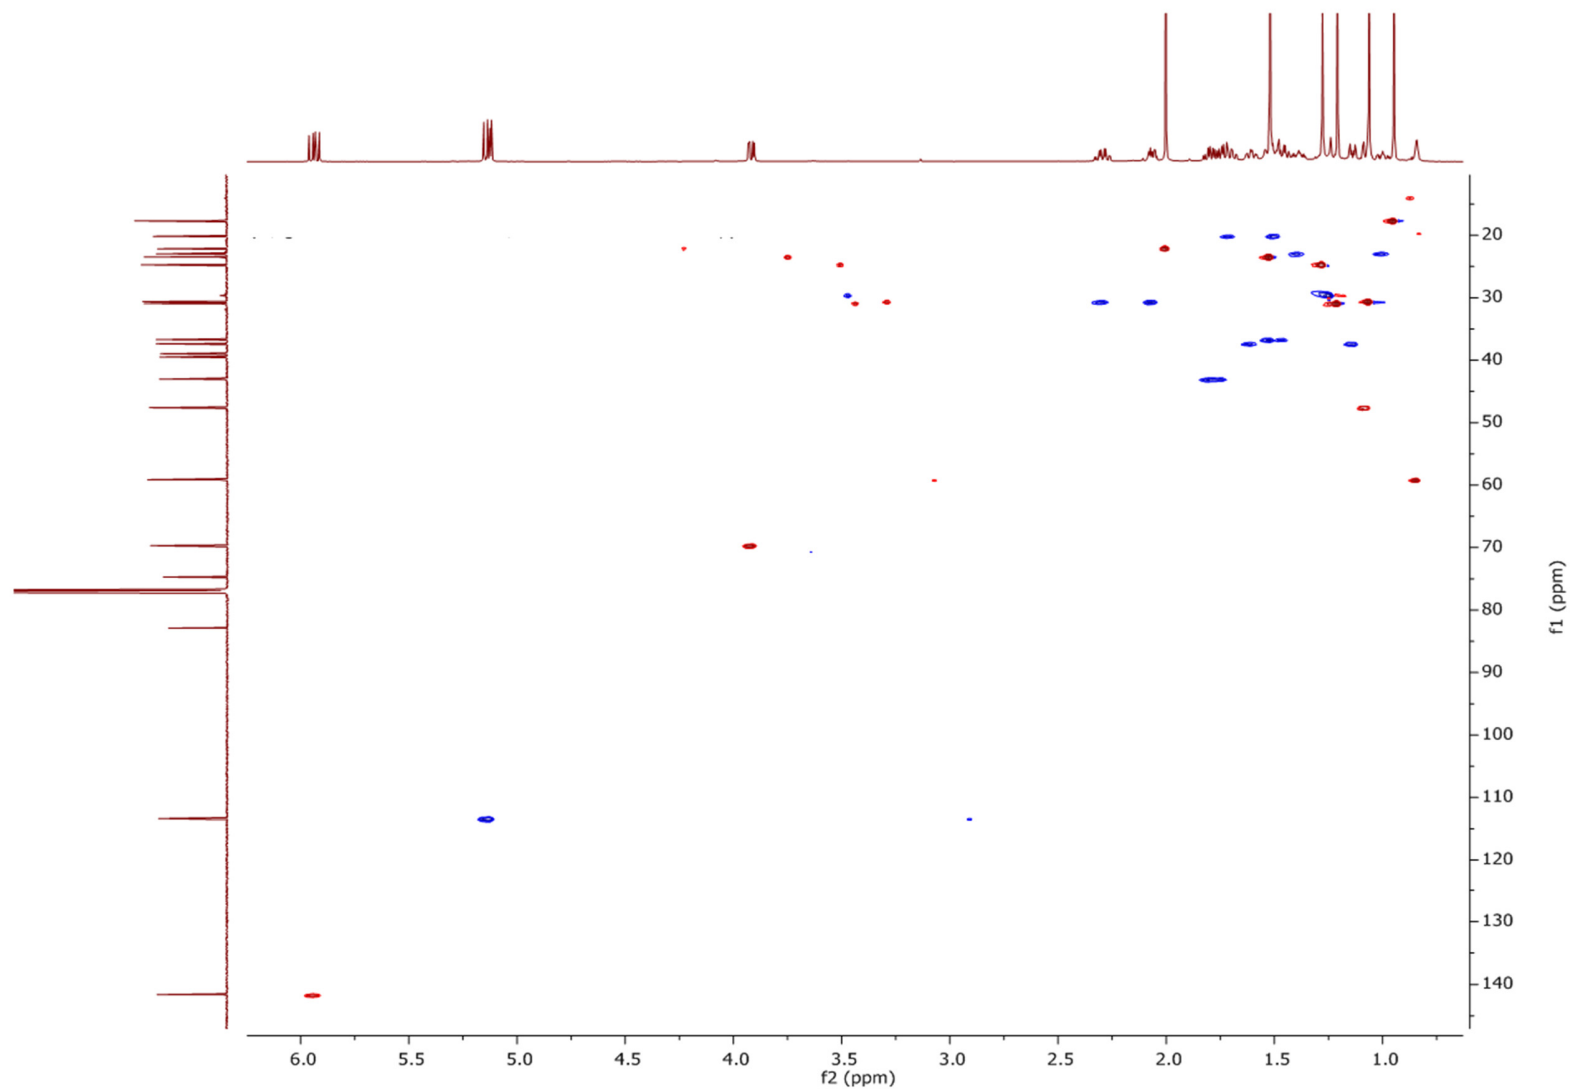

**Figure S5.** HSQC-DEPT NMR spectrum (600MHz, CDCl<sub>3</sub>, 303K) of compound **1**

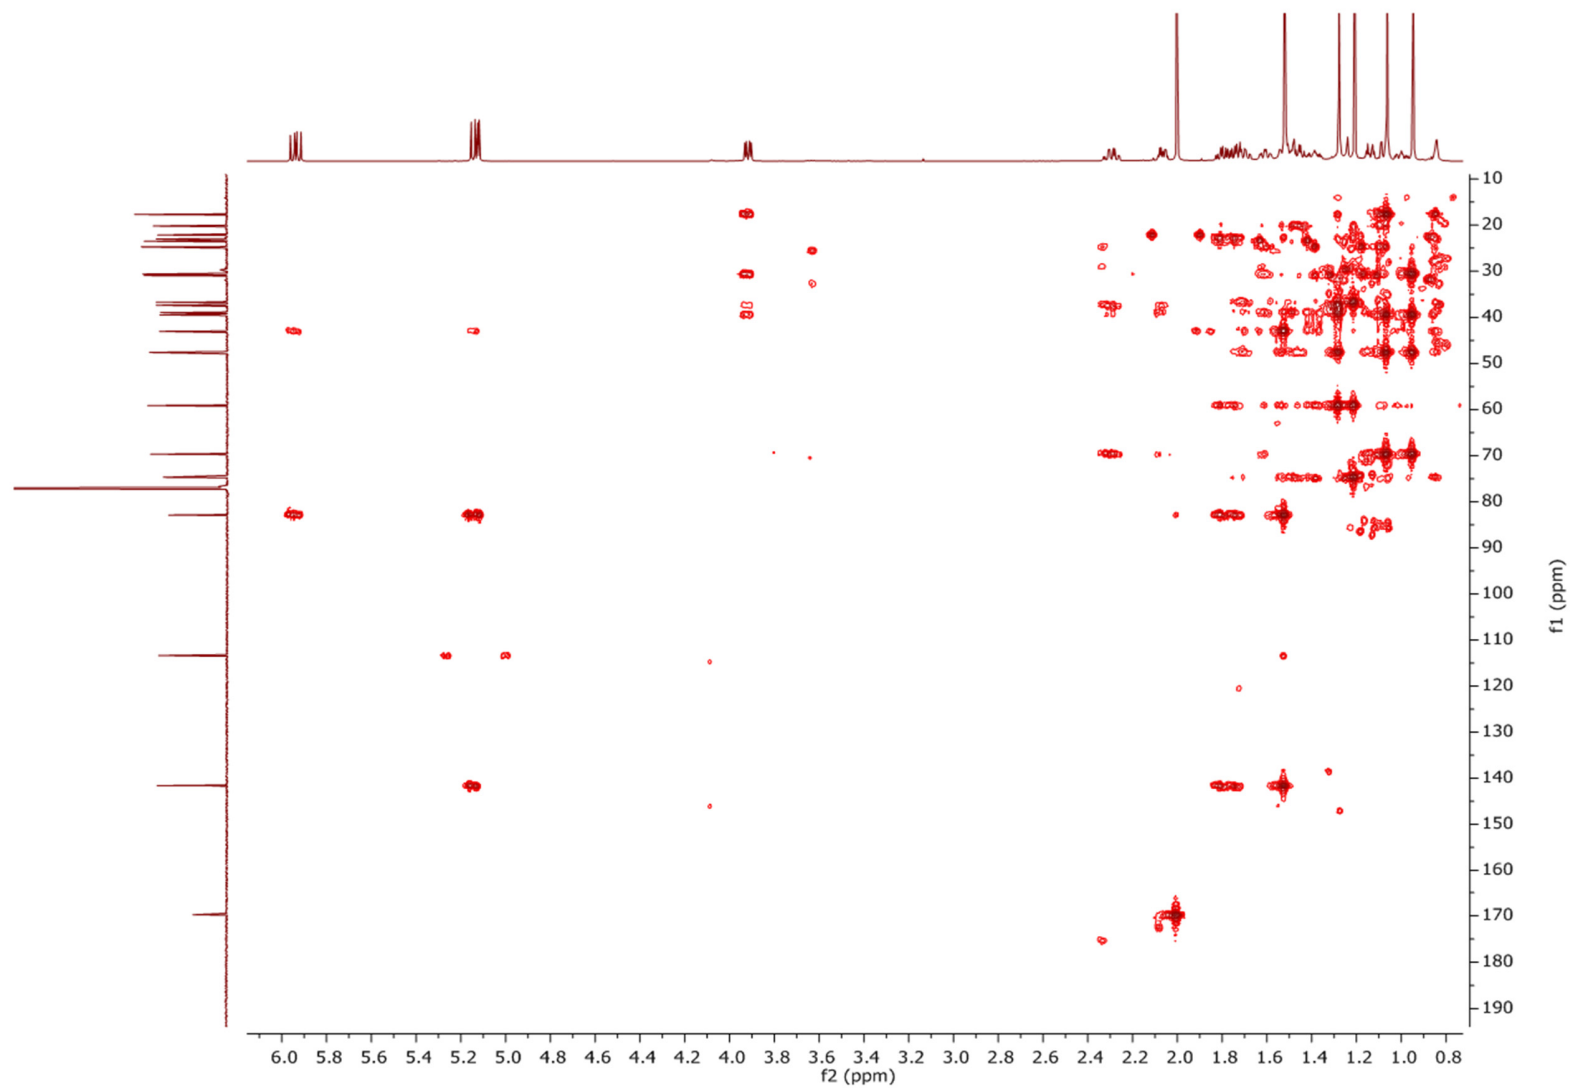

**Figure S6.** HMBC NMR spectrum (600MHz, CDCl<sub>3</sub>, 303K) of compound **1**

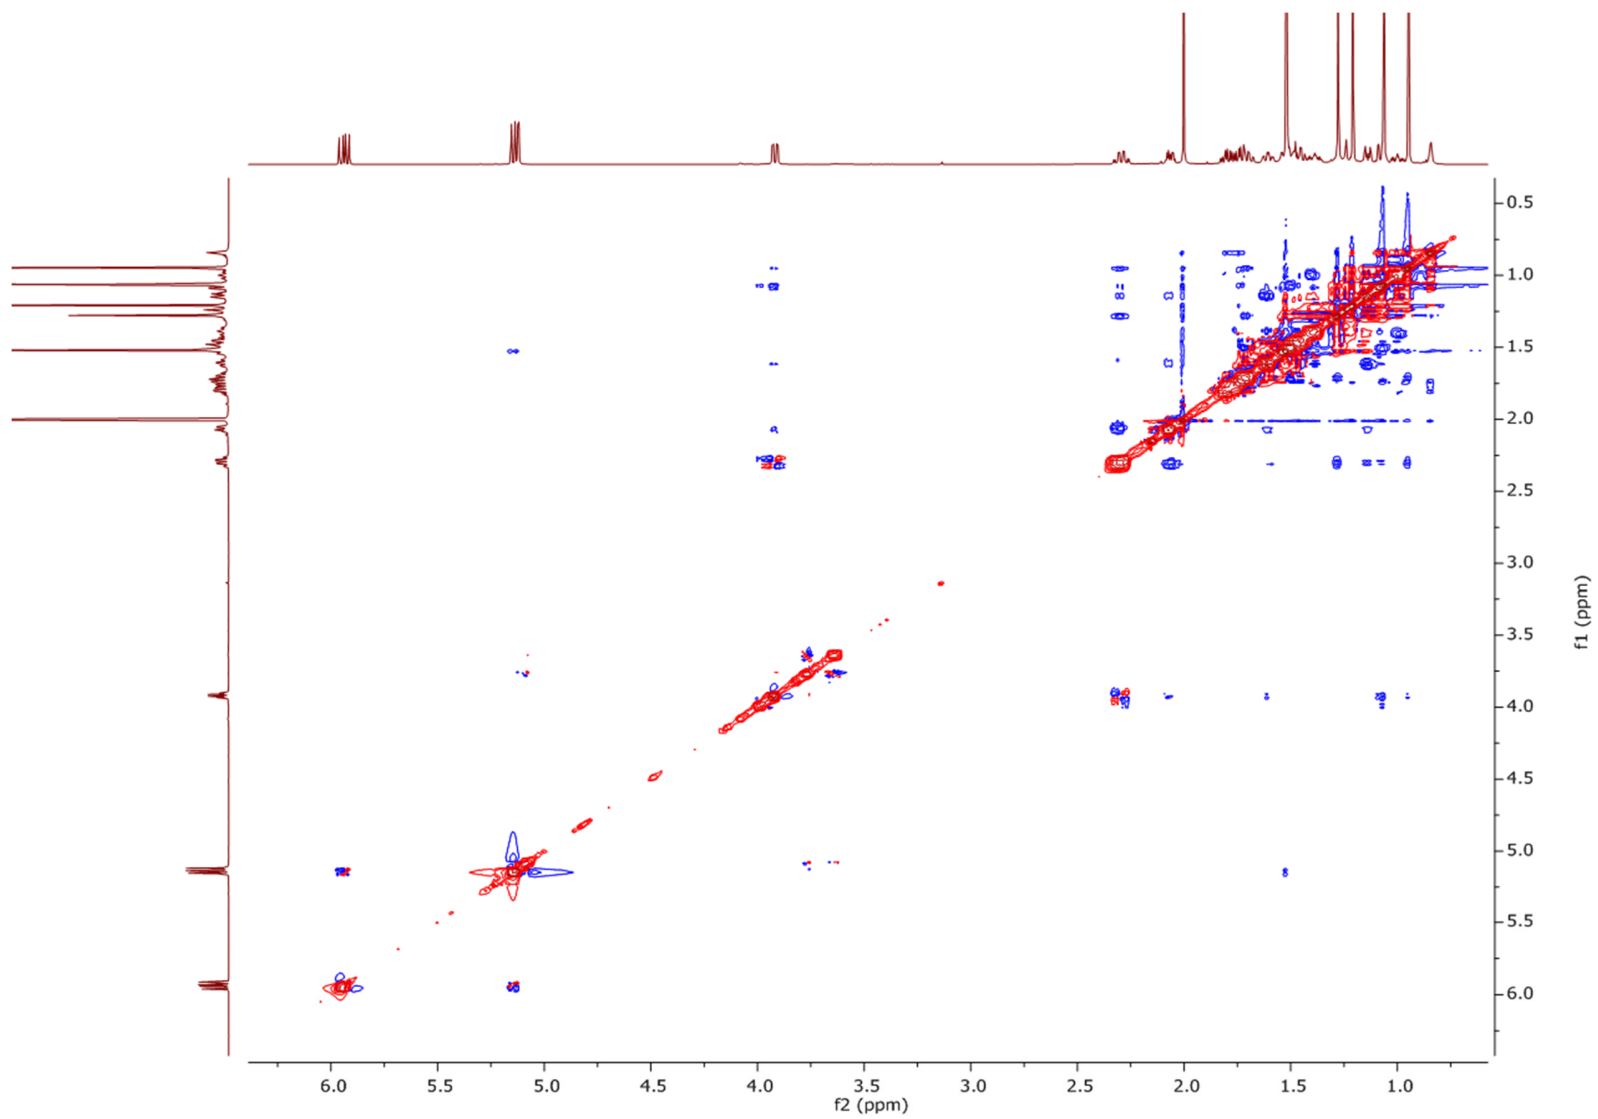

**Figure S7.** ROESY NMR spectrum (600MHz, CDCl<sub>3</sub>, 303K) of compound **1**

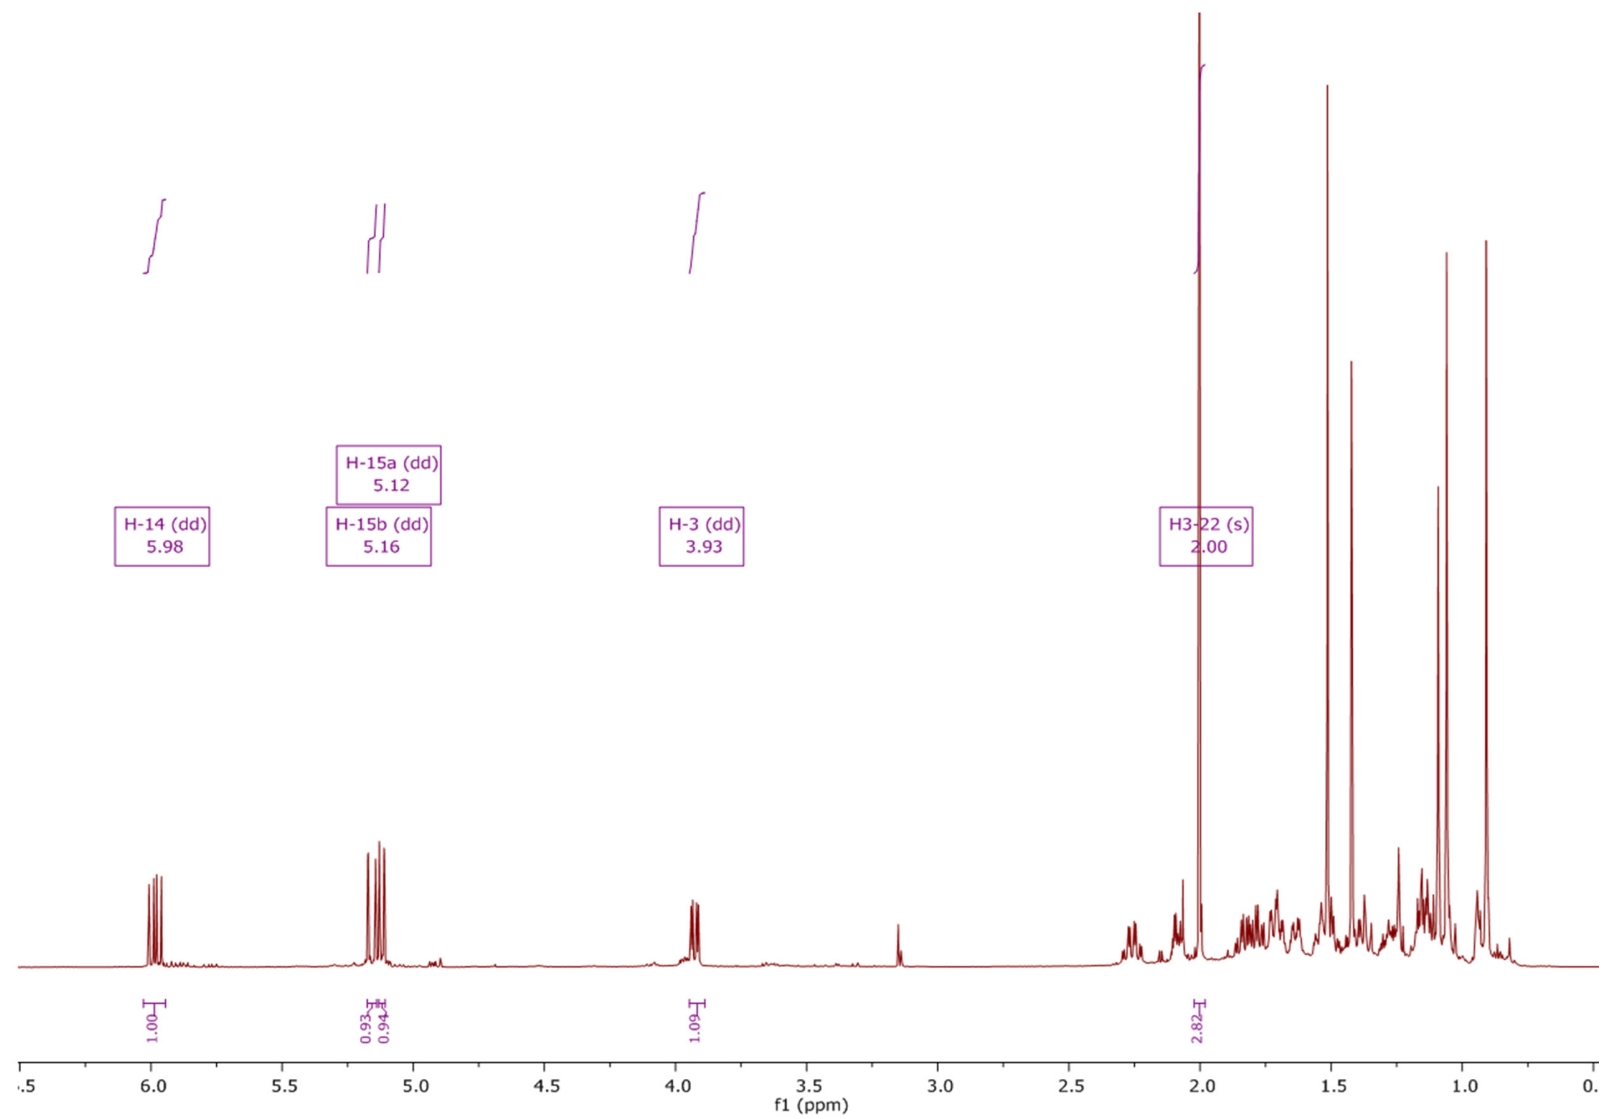

Figure S8. <sup>1</sup>H-NMR spectrum (600MHz, CDCl<sub>3</sub>, 303K) of compound 2

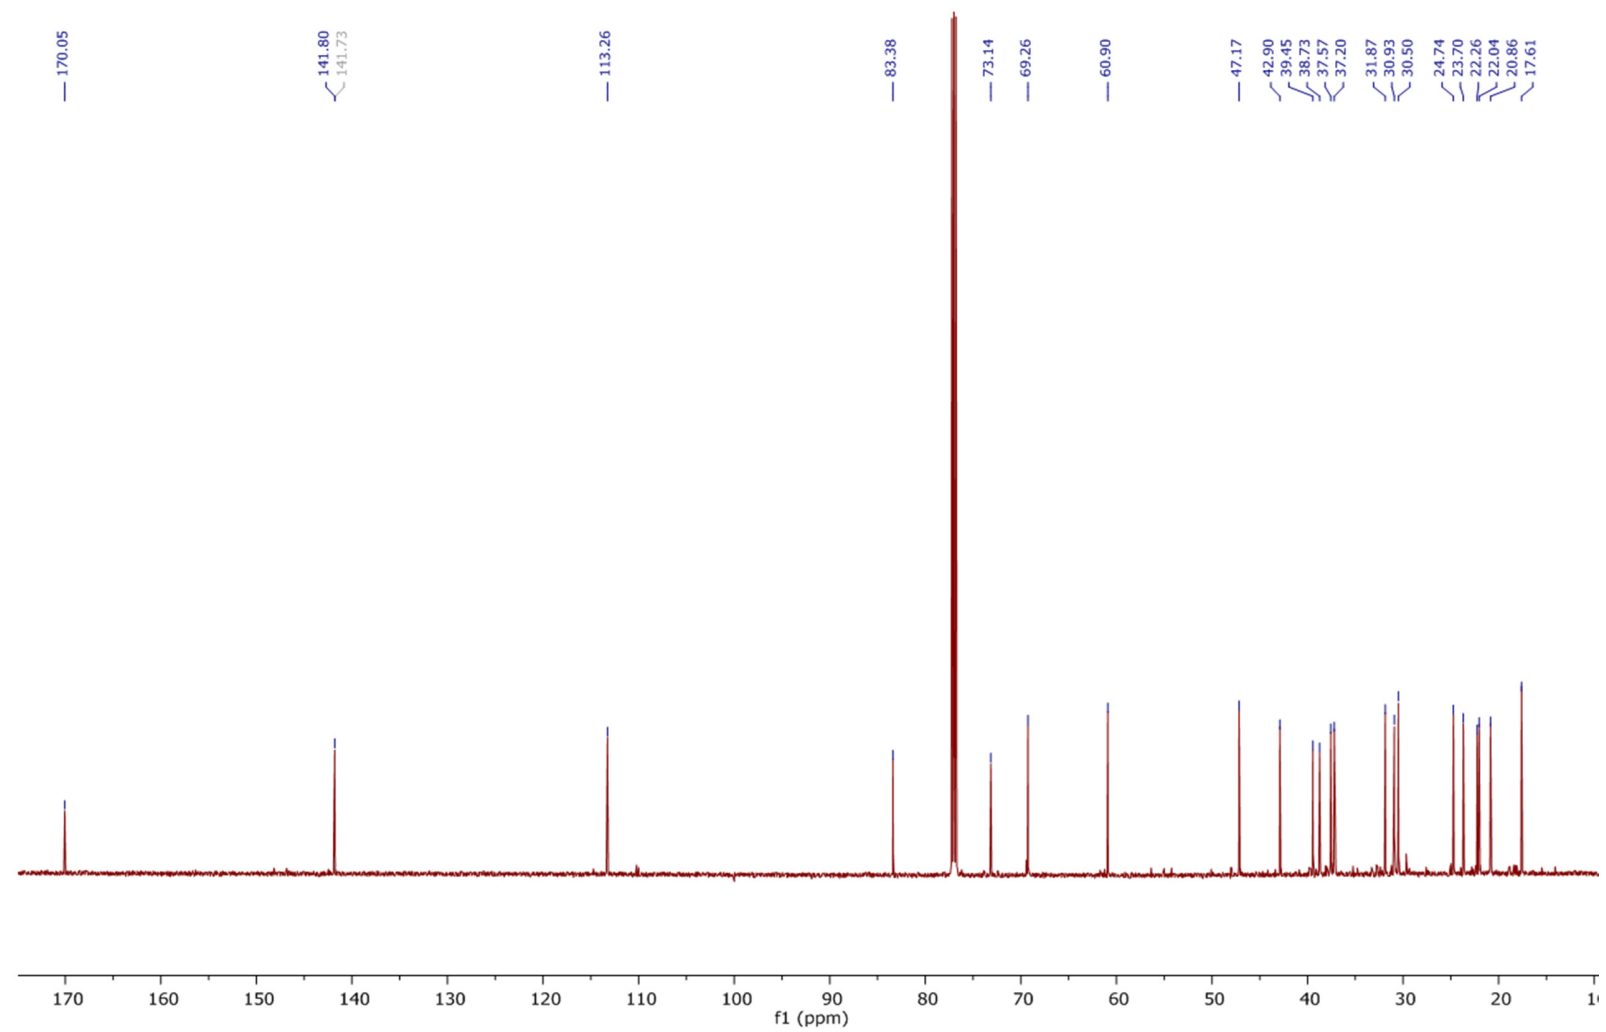

**Figure S9.**  $^{13}\text{C}$ -NMR spectrum (150MHz,  $\text{CDCl}_3$ , 303K) of compound 2

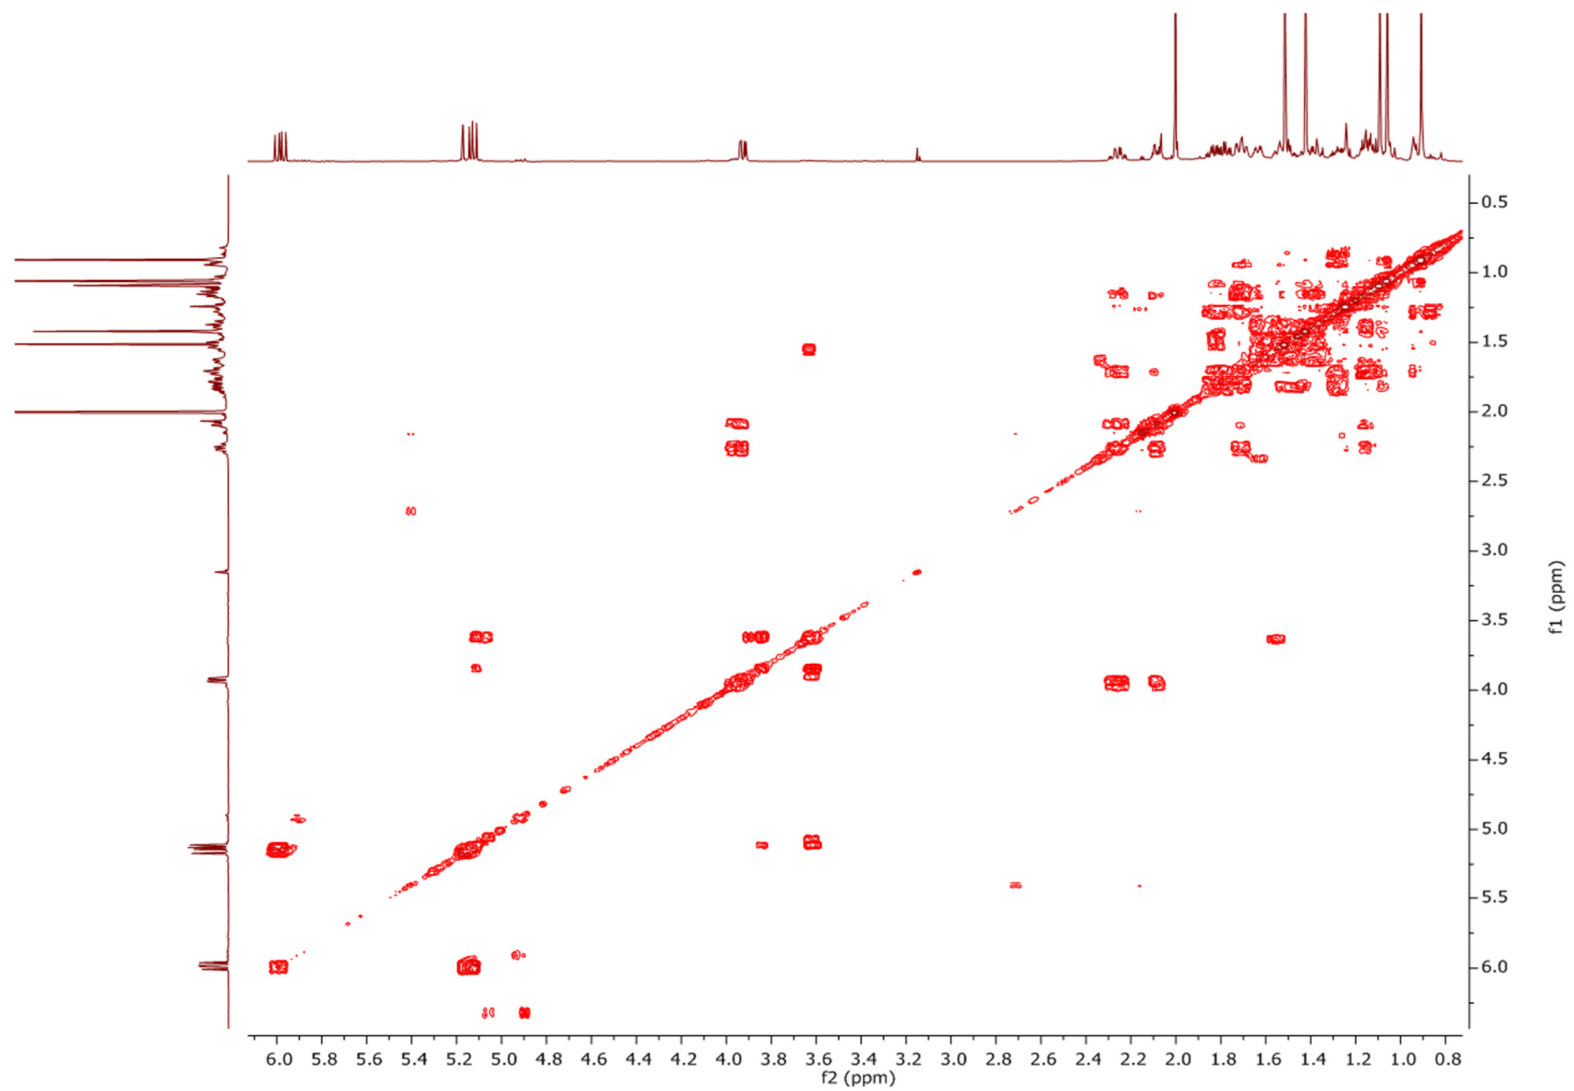

**Figure S10.**  $^1\text{H}$ - $^1\text{H}$  COSY NMR spectrum (600MHz,  $\text{CDCl}_3$ ), 303K of compound **2**

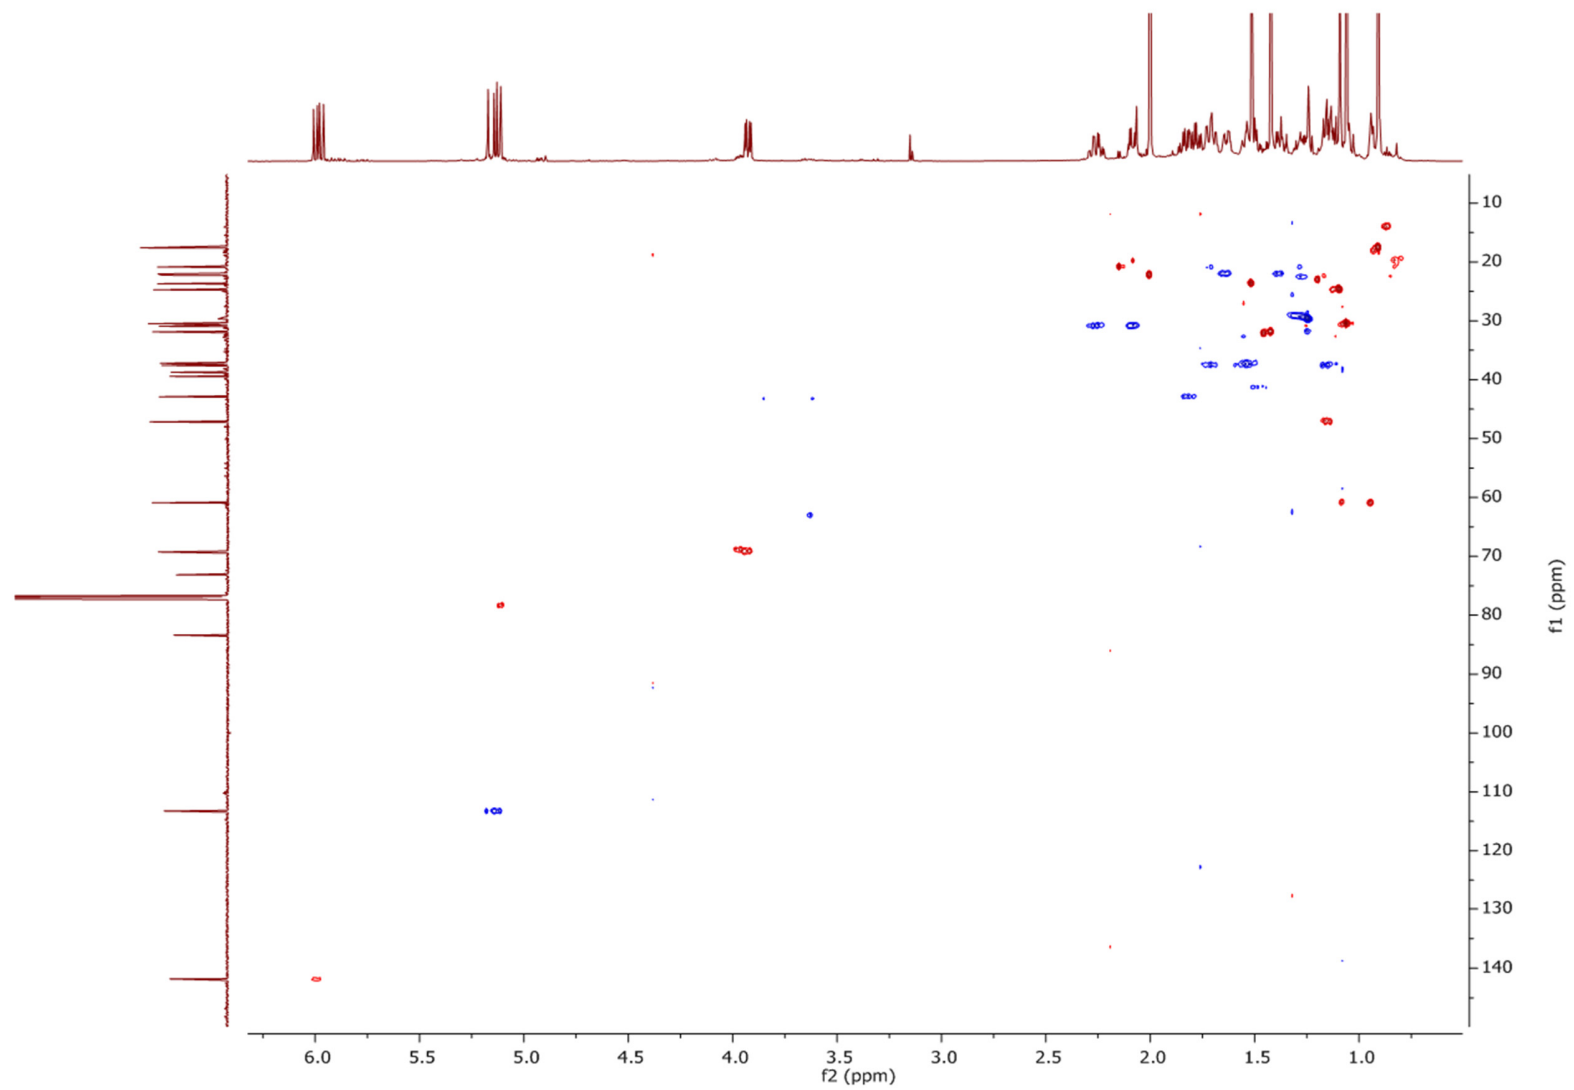

**Figure S11.** HSQC-DEPT NMR spectrum (600MHz, CDCl<sub>3</sub>, 303K) of compound **2**

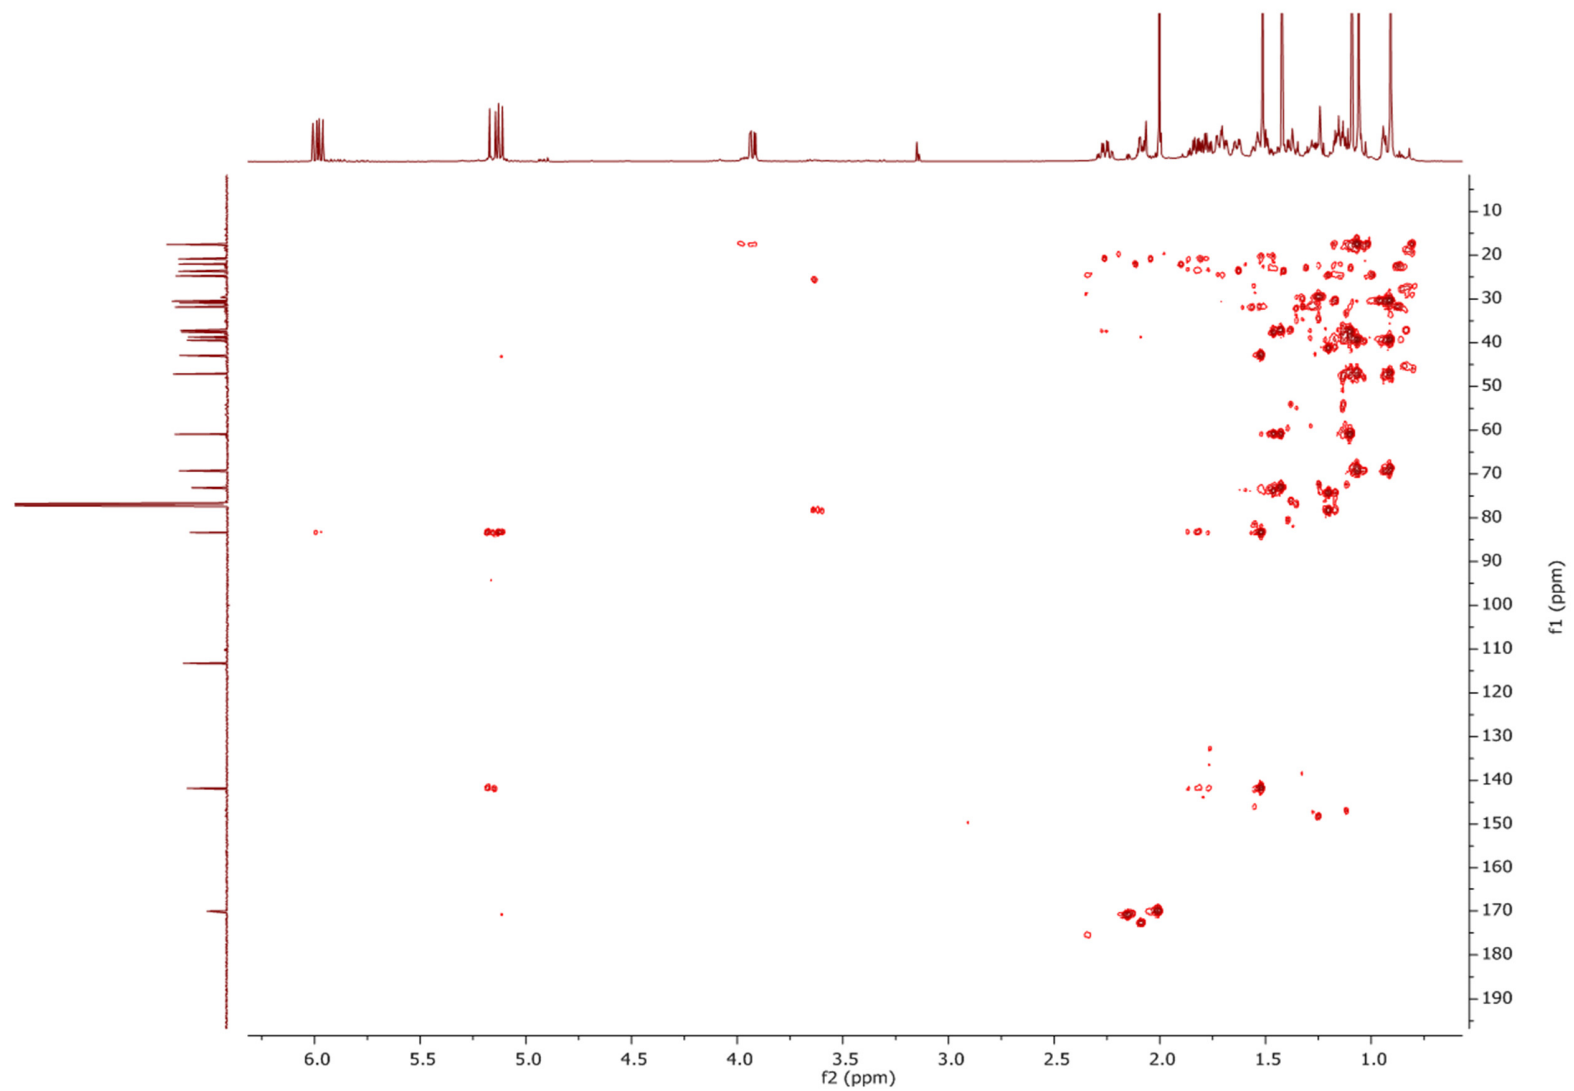

**Figure S12.** HMBC NMR spectrum (600MHz, CDCl<sub>3</sub>, 303K) of compound **2**



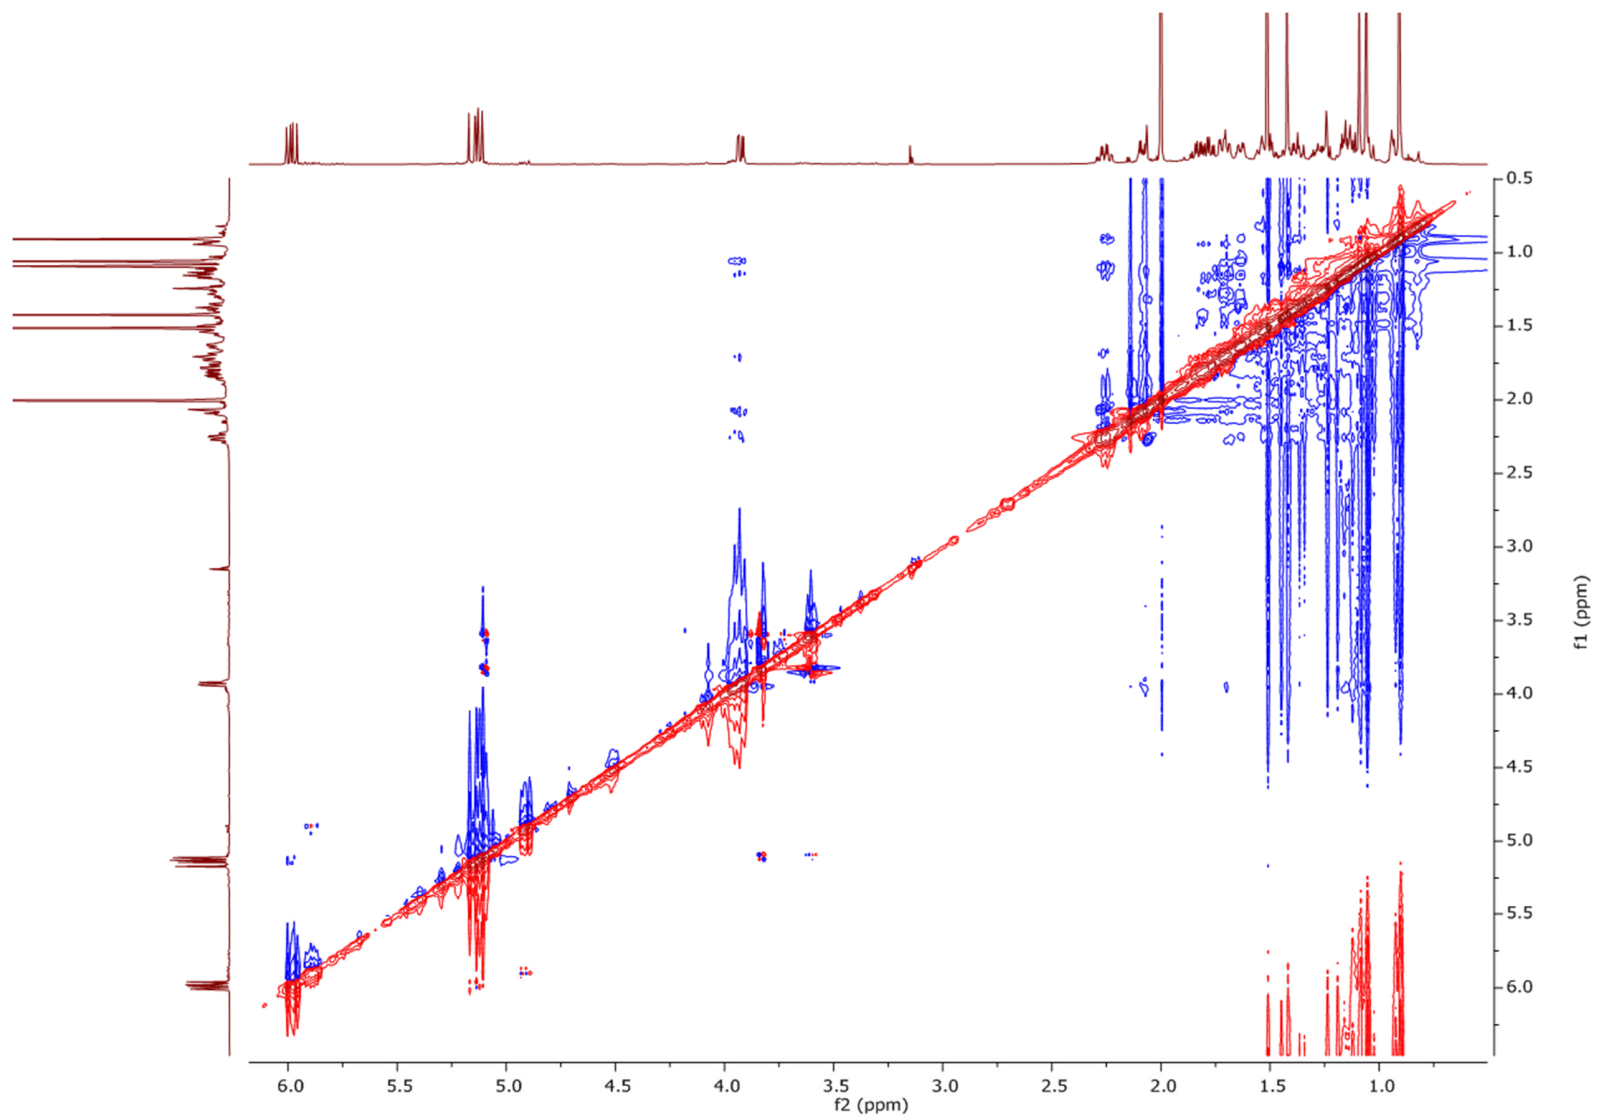

**Figure S13.** ROESY NMR spectrum (600MHz, CDCl<sub>3</sub>, 303K) of compound **2**

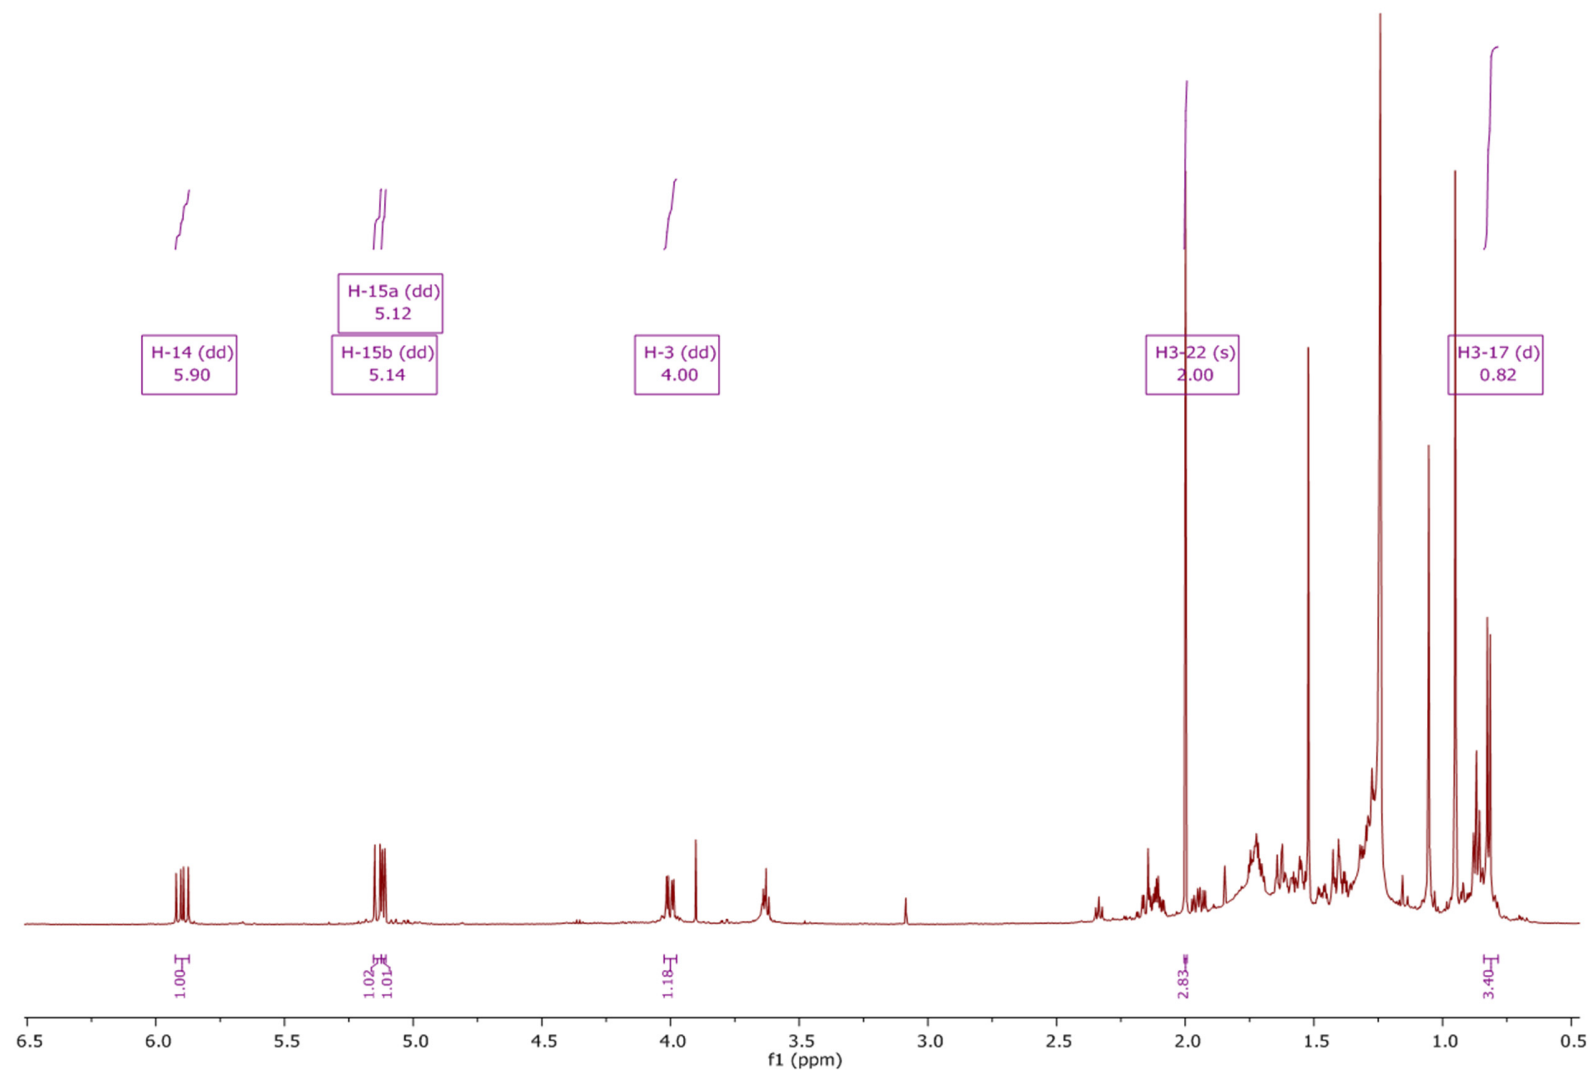

**Figure S14.** <sup>1</sup>H-NMR spectrum (600MHz, CDCl<sub>3</sub>, 303K) of compound 3

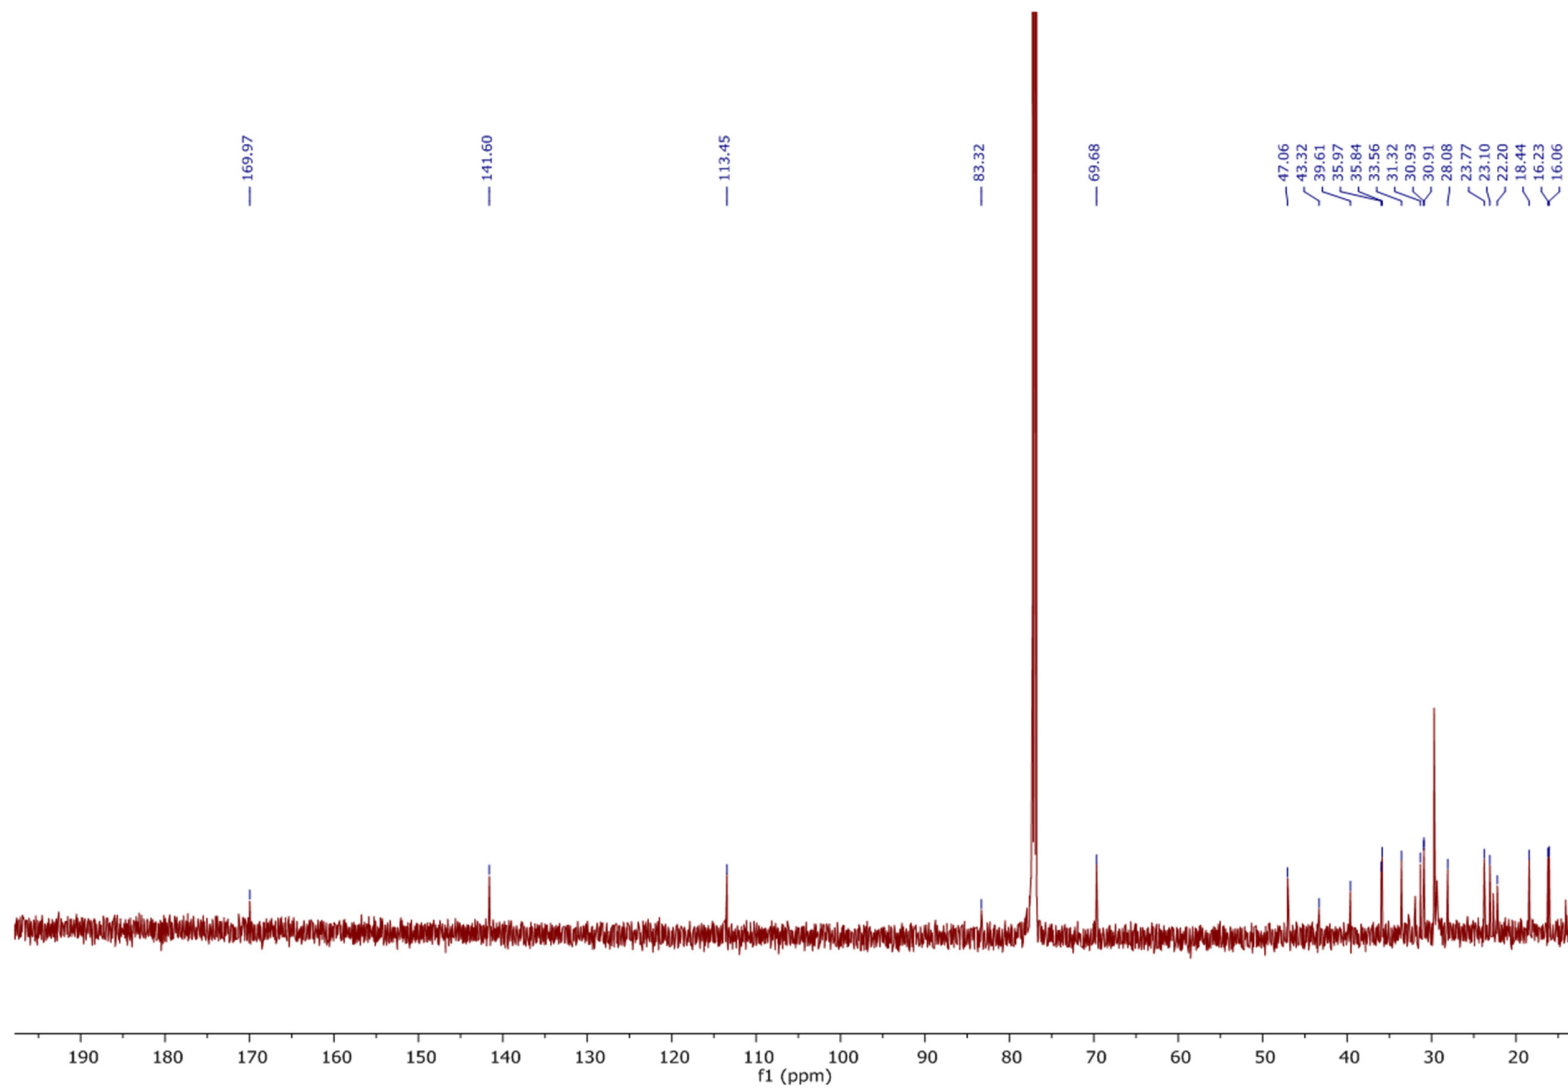

Figure S15.  $^{13}\text{C}$ -NMR spectrum (150MHz,  $\text{CDCl}_3$ , 303K) of compound 3

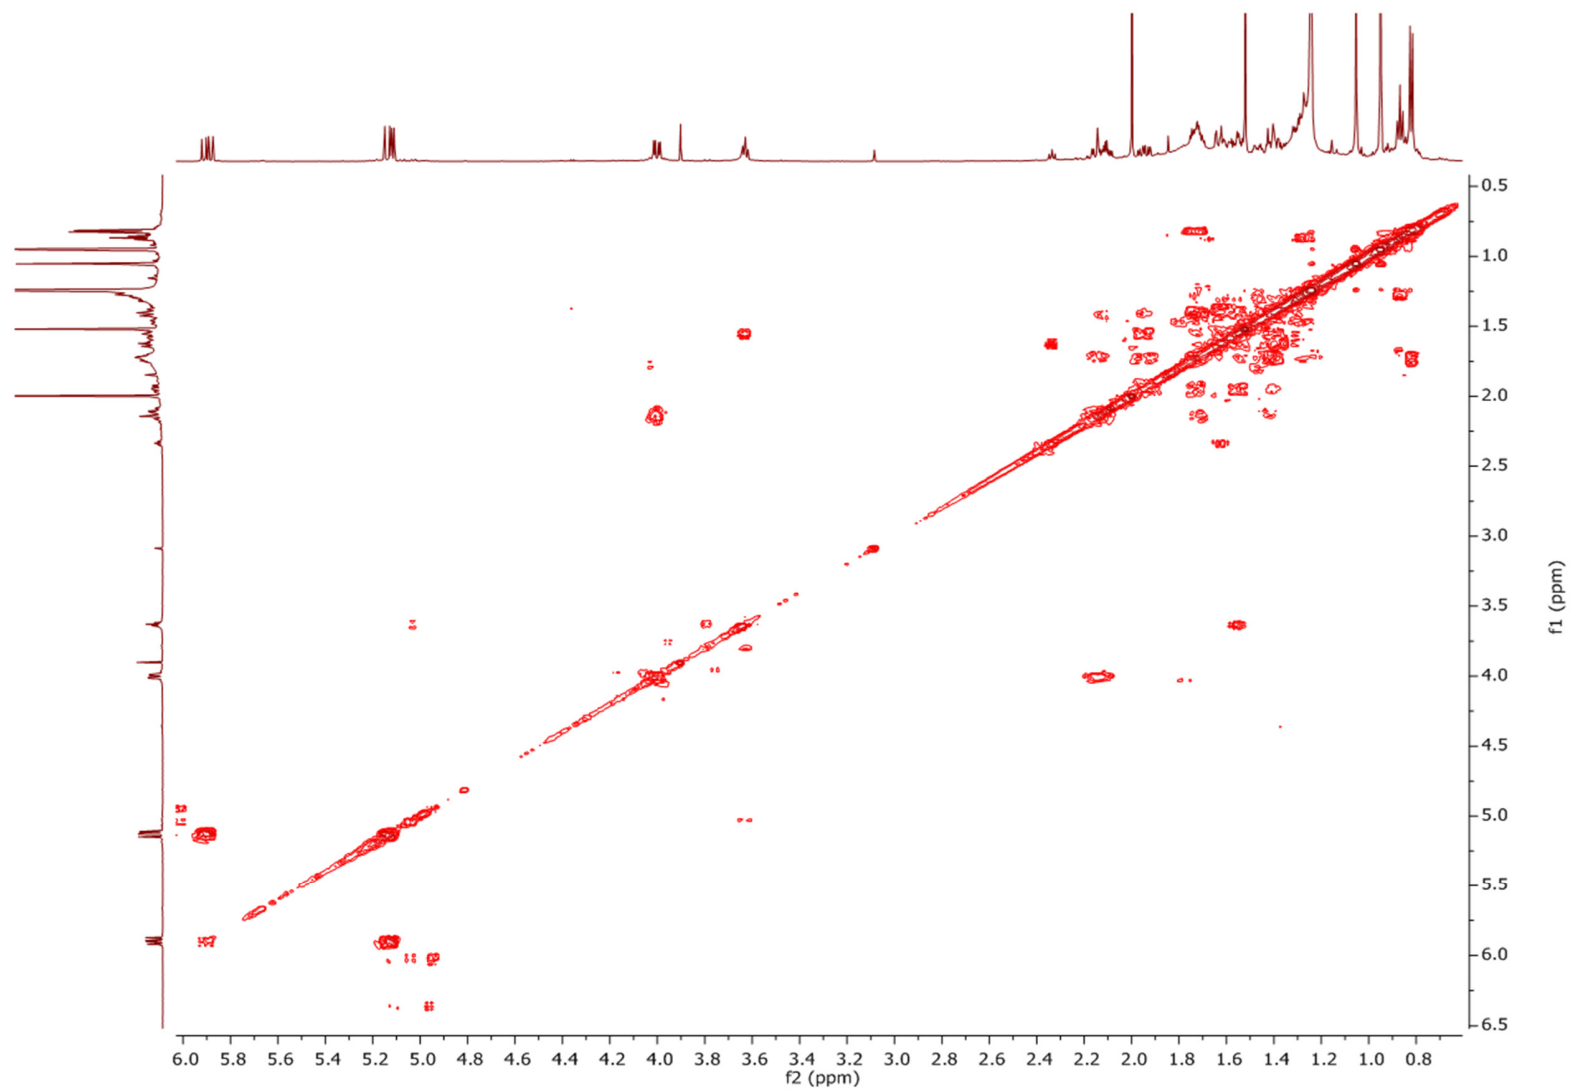

**Figure S16.**  $^1\text{H}$ - $^1\text{H}$  COSY NMR spectrum (600MHz,  $\text{CDCl}_3$ , 303K) of compound **3**

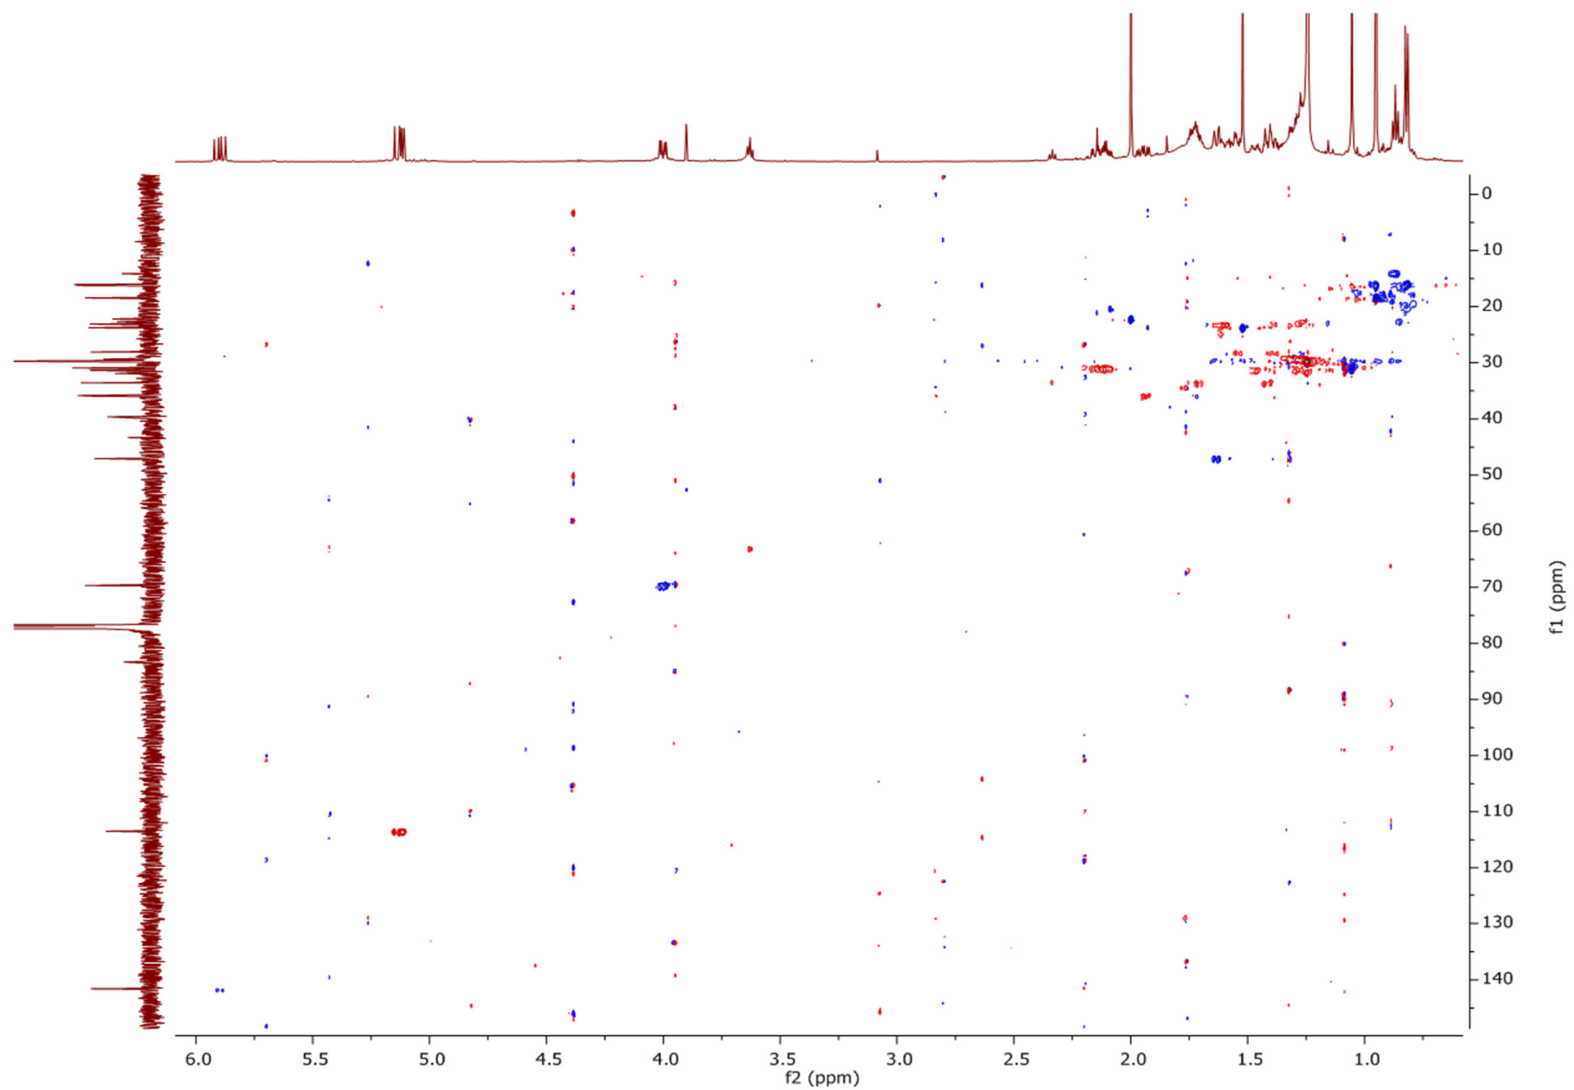

Figure S17. HSQC-DEPT NMR spectrum (600MHz, CDCl<sub>3</sub>, 303K) of compound 3

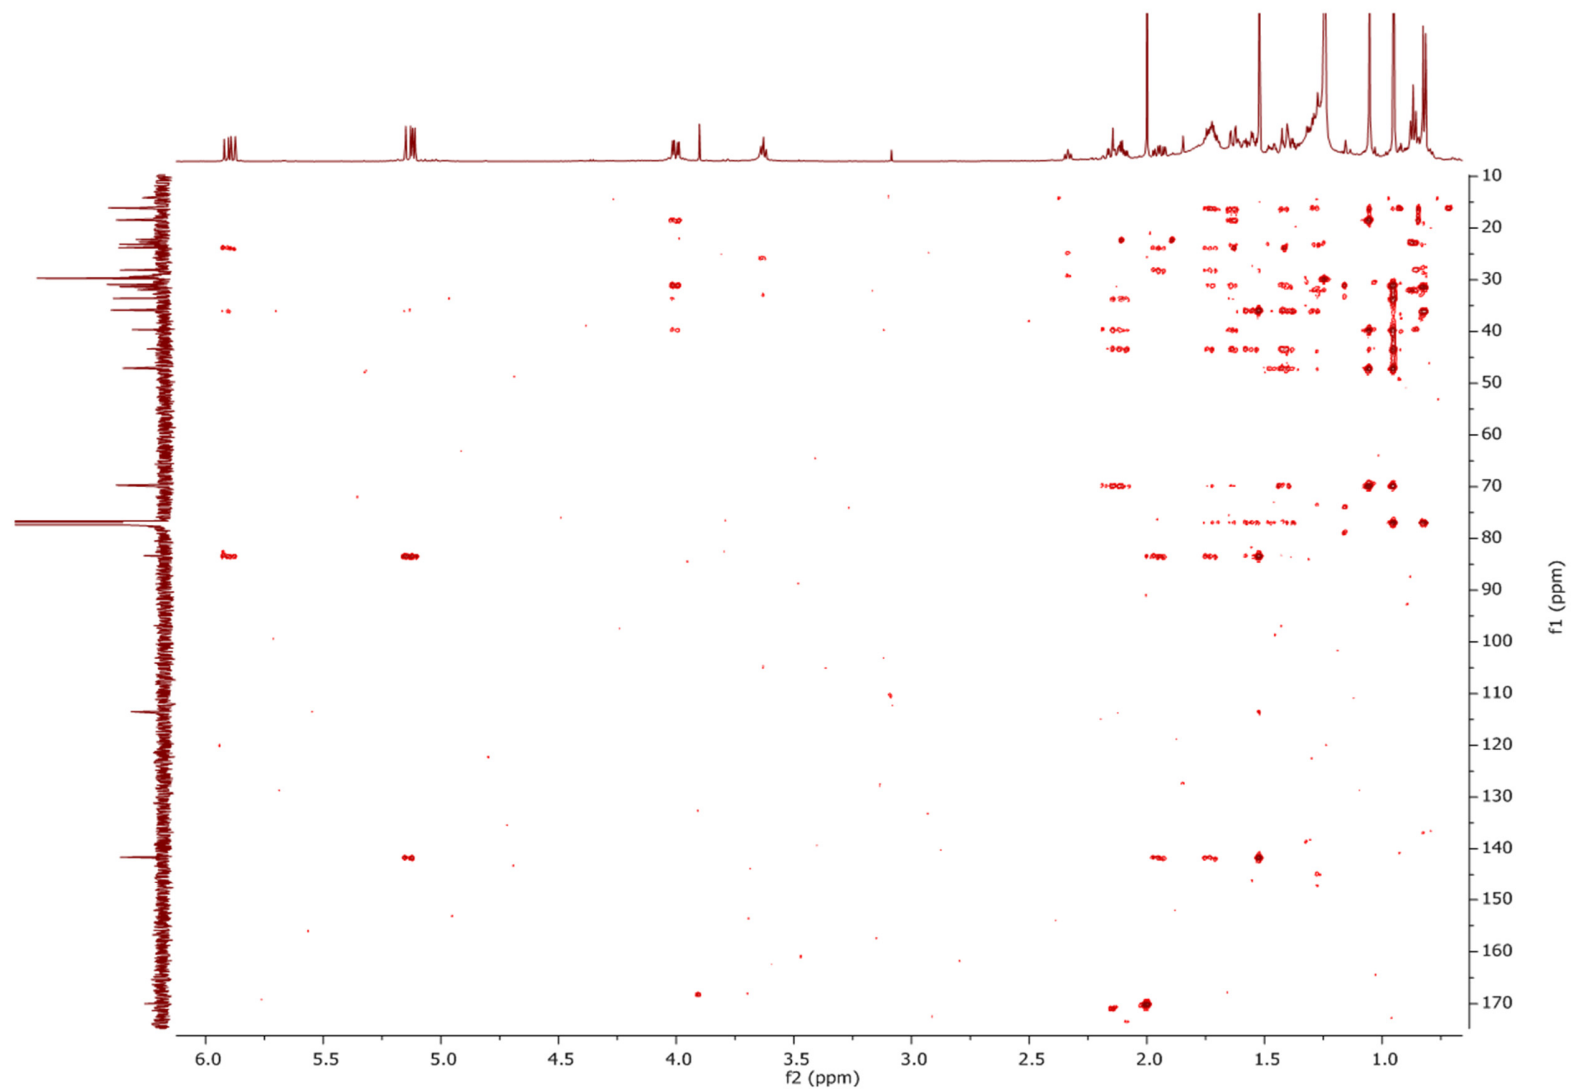

**Figure S18.** HMBC NMR spectrum (600MHz, CDCl<sub>3</sub>, 303K) of compound **3**

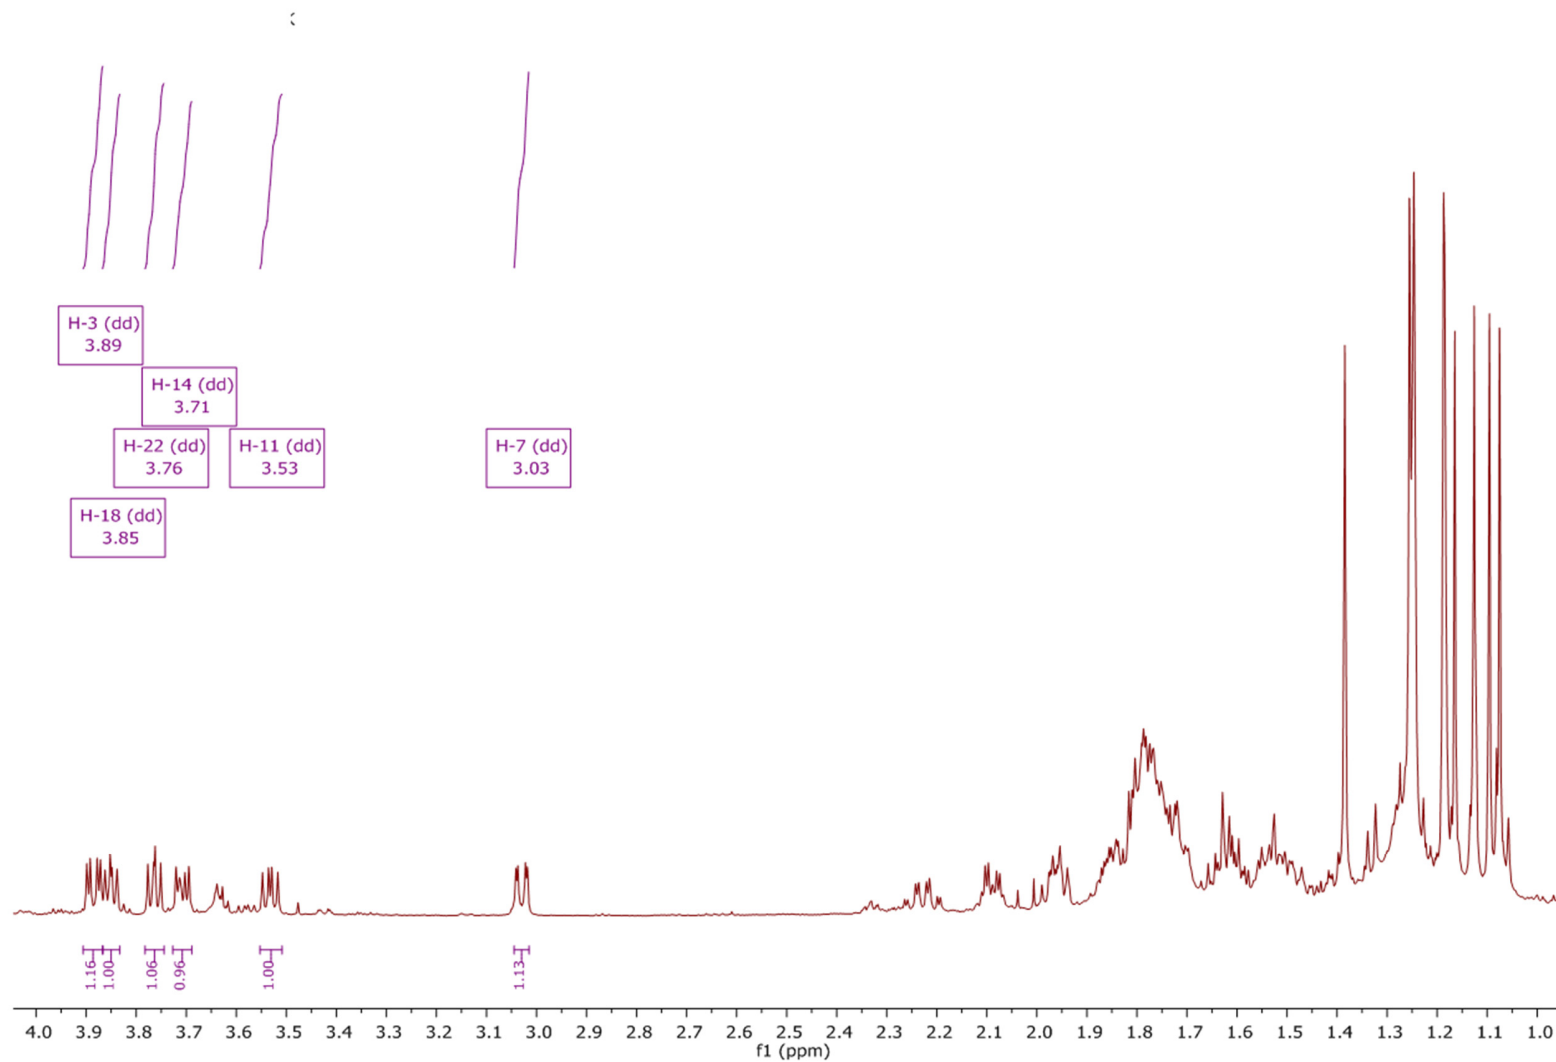

**Figure S19.** <sup>1</sup>H-NMR spectrum (600MHz, CDCl<sub>3</sub>, 303K) of compound 4

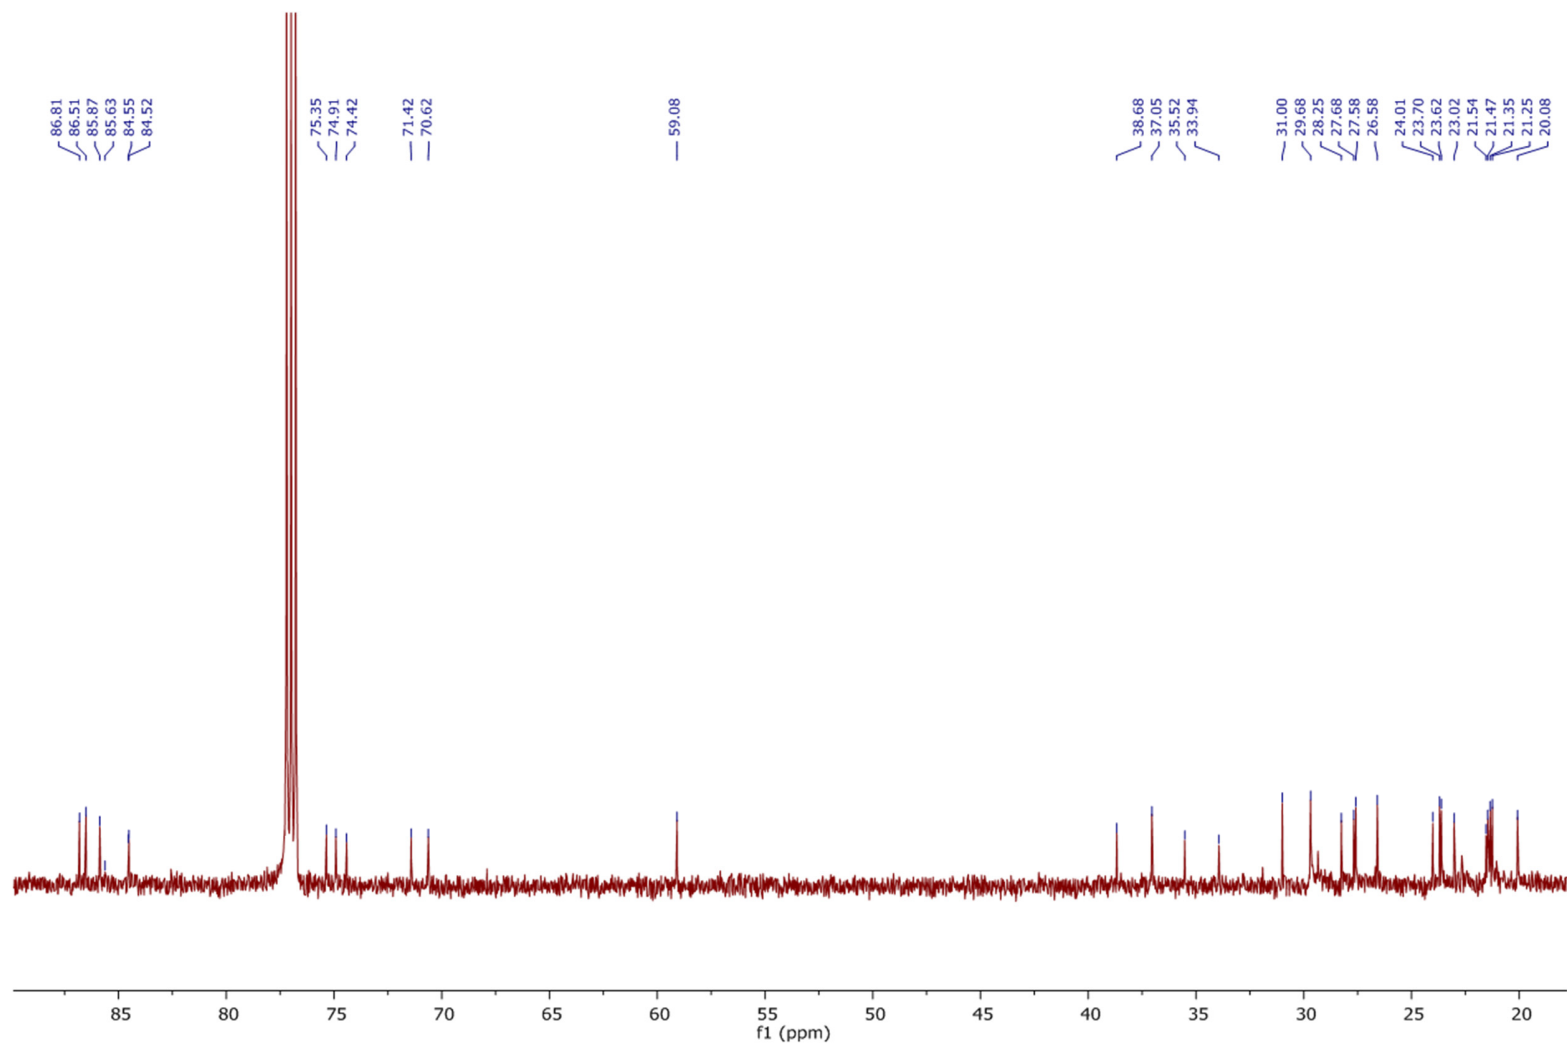

Figure S20.  $^{13}\text{C}$ -NMR spectrum (150MHz,  $\text{CDCl}_3$ , 303K) of compound **4**



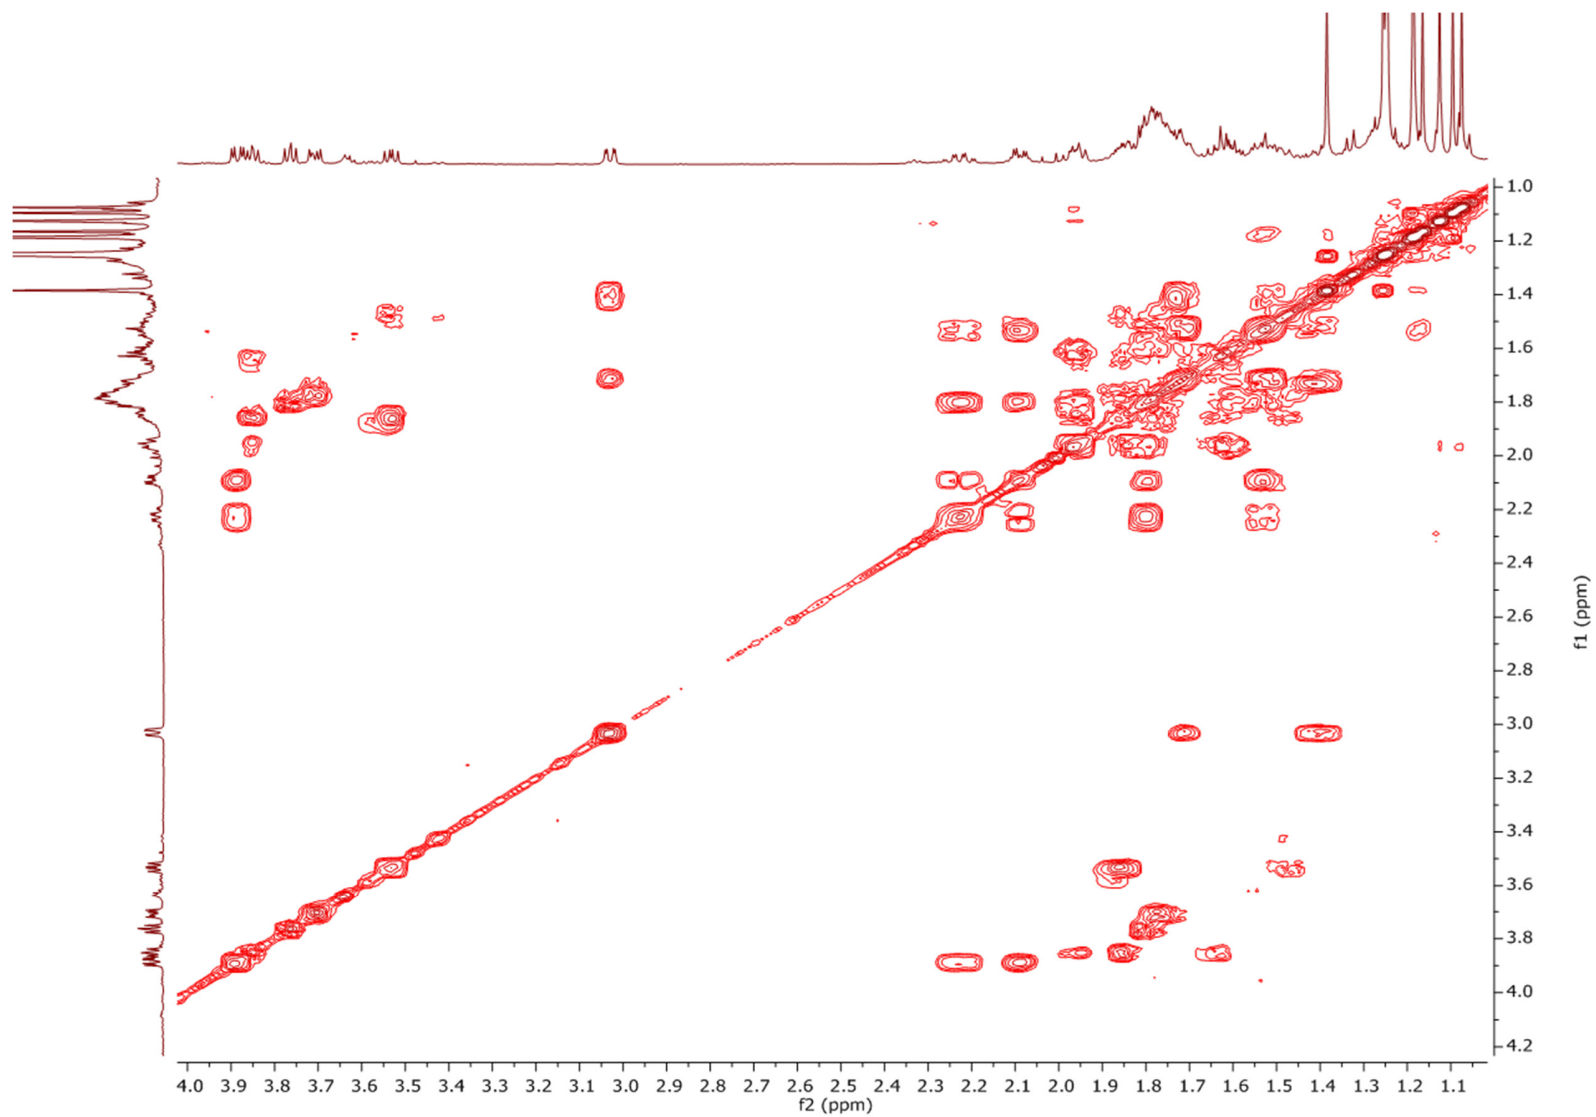

**Figure S21.**  $^1\text{H}$ - $^1\text{H}$  COSY NMR spectrum (600MHz,  $\text{CDCl}_3$ , 303K) of compound 4

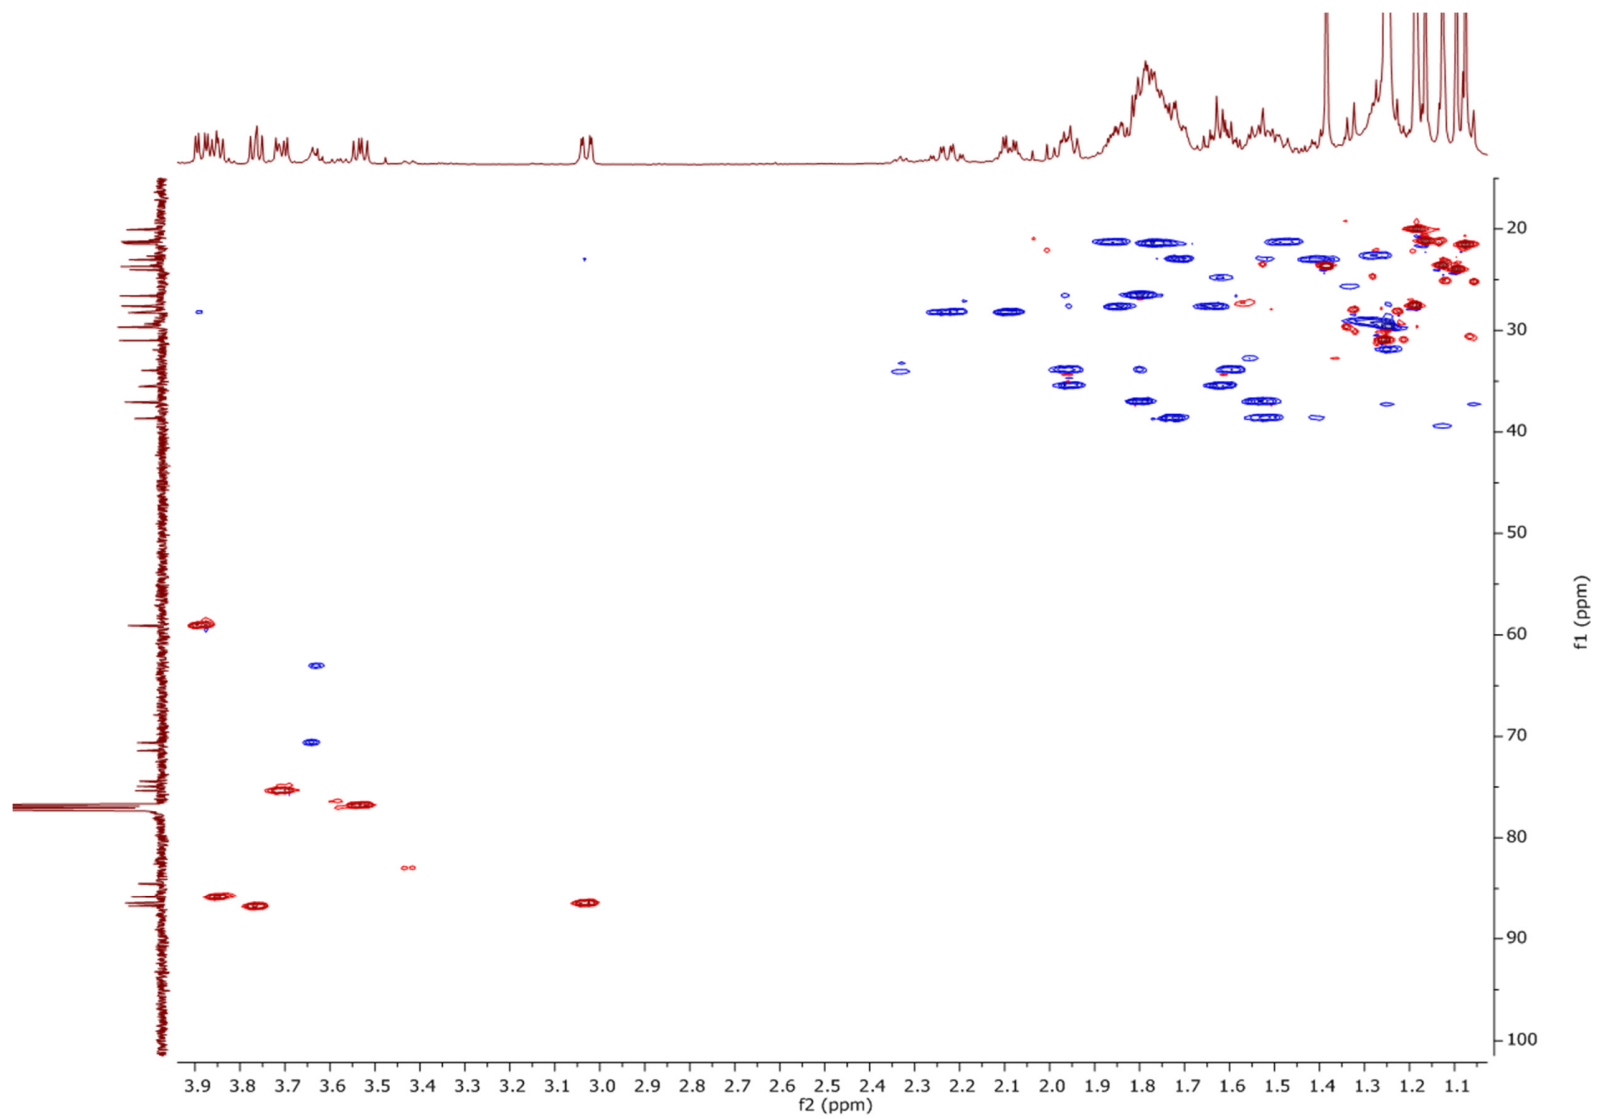

Figure S22. HSQC-DEPT NMR spectrum (600MHz, CDCl<sub>3</sub>, 303K) of compound 4

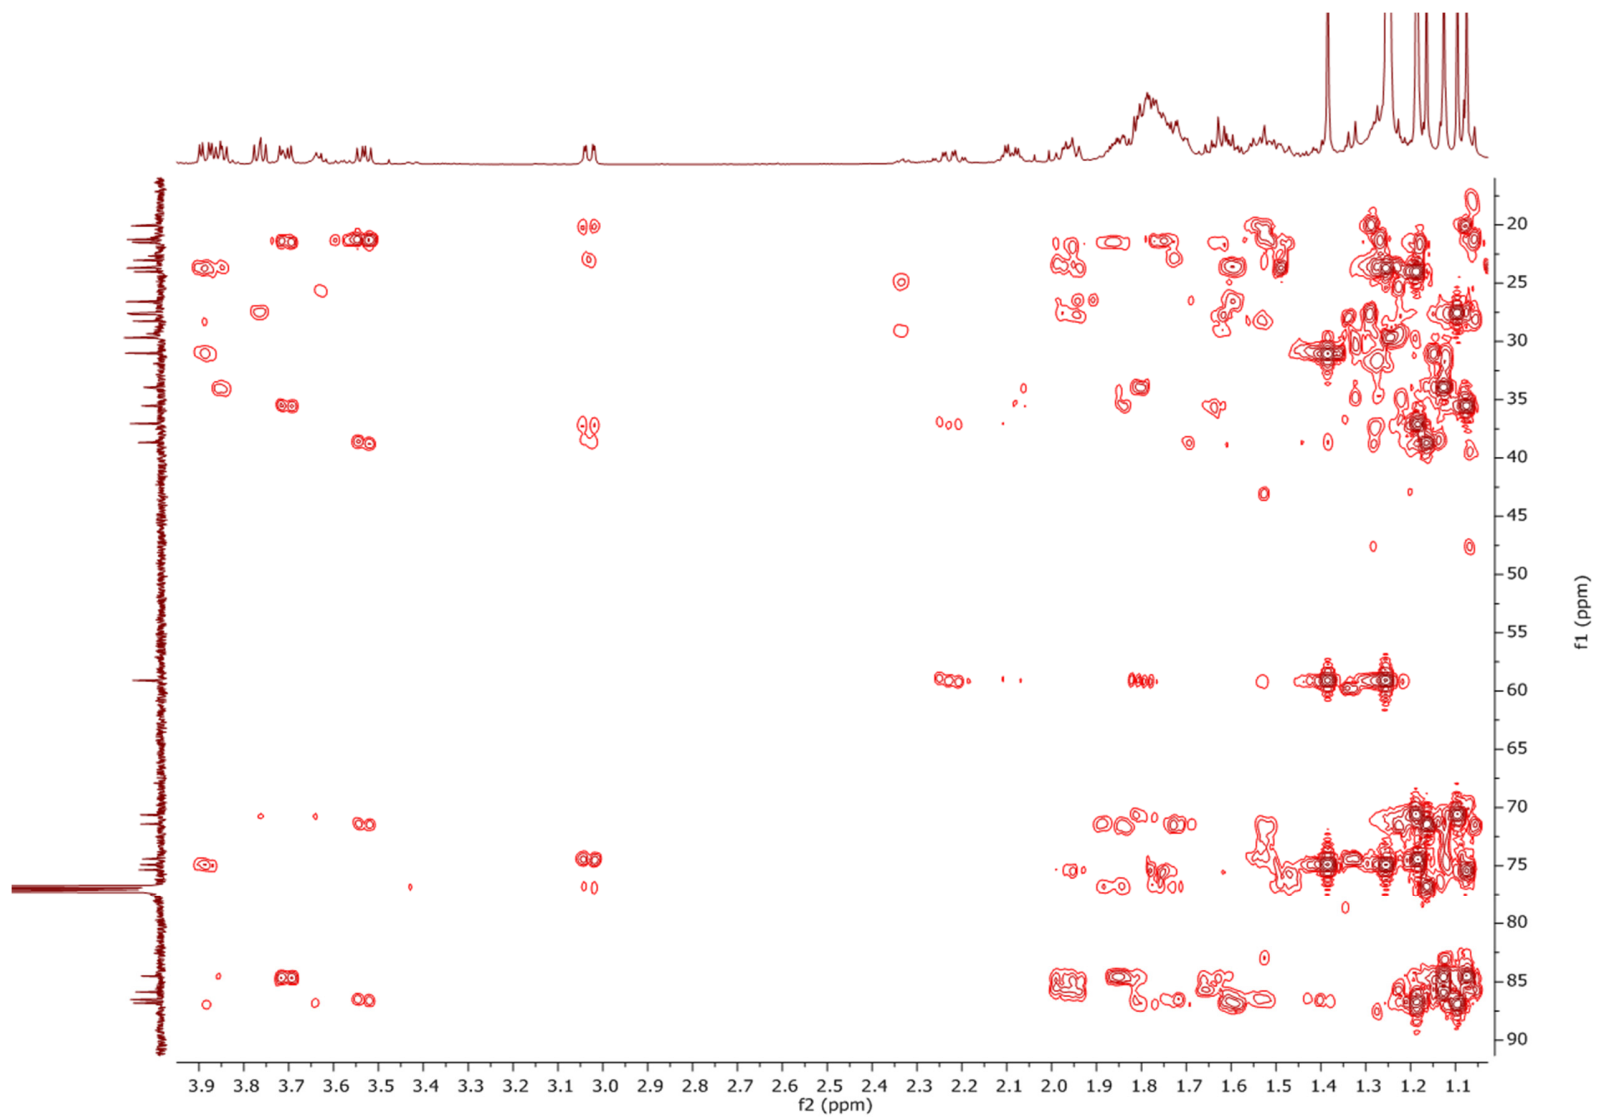

Figure S23. HMBC NMR spectrum (600MHz, CDCl<sub>3</sub>, 303K) of compound 4

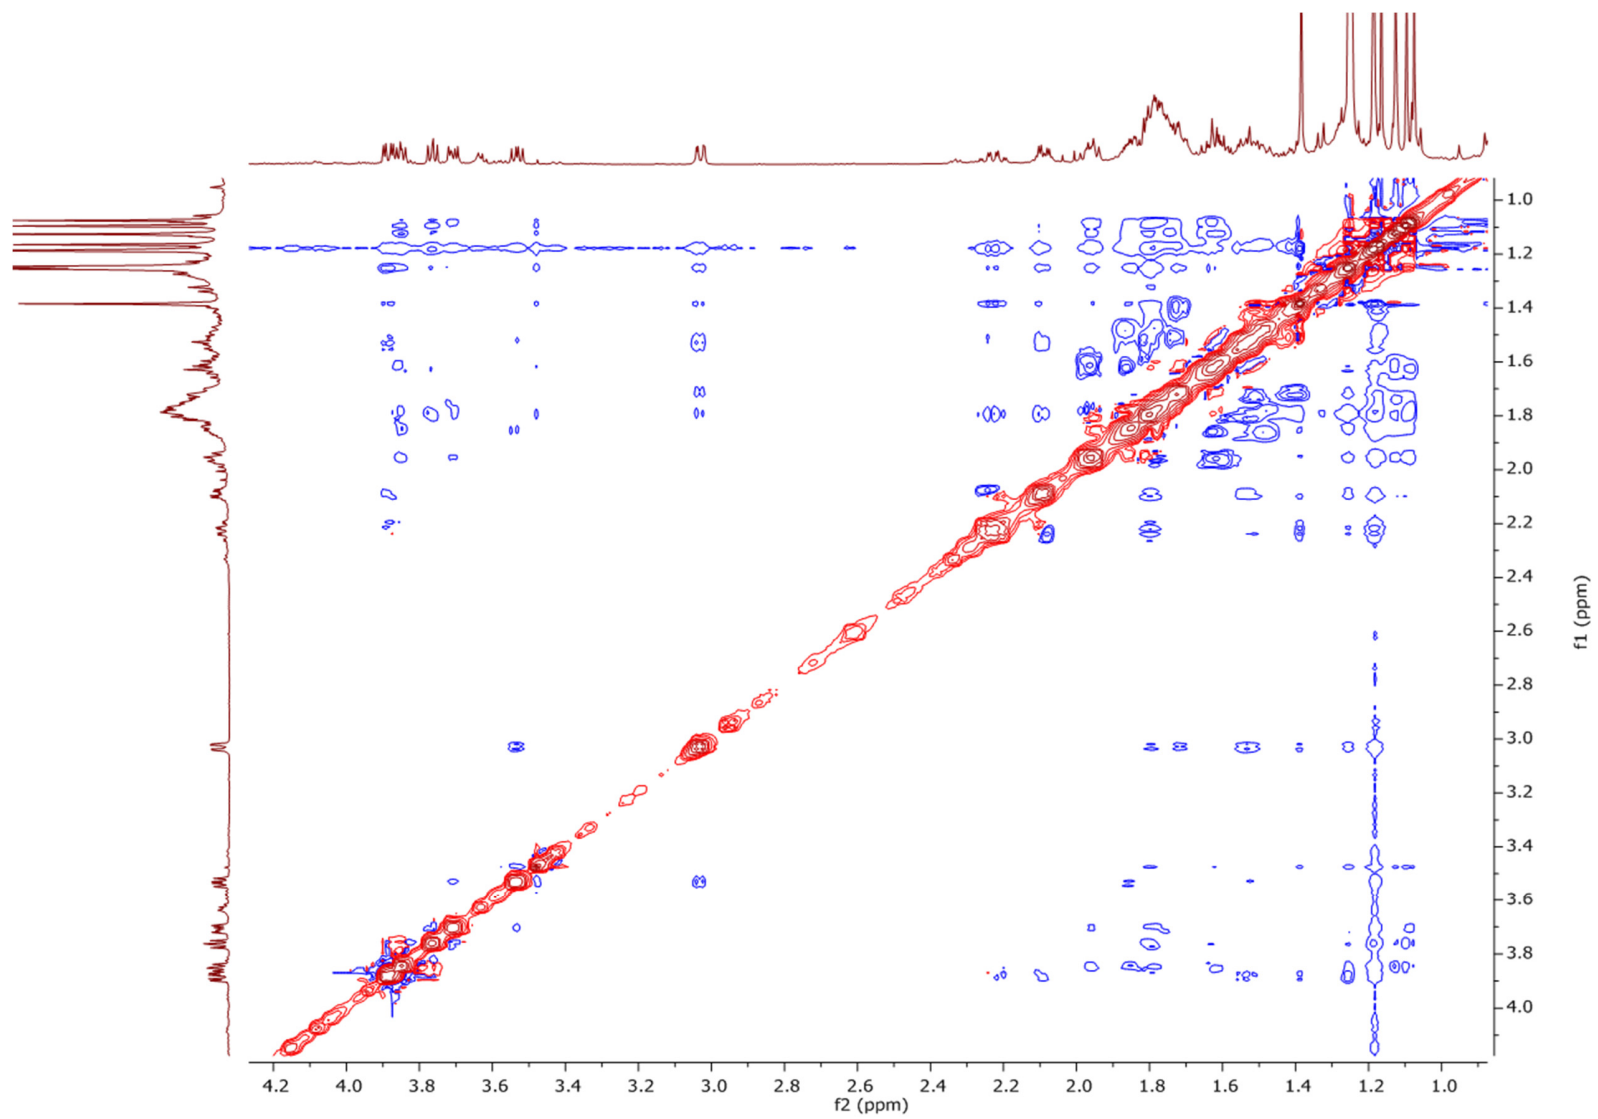

Figure S24. ROESY NMR spectrum (600MHz, CDCl<sub>3</sub>, 303K) of compound 4

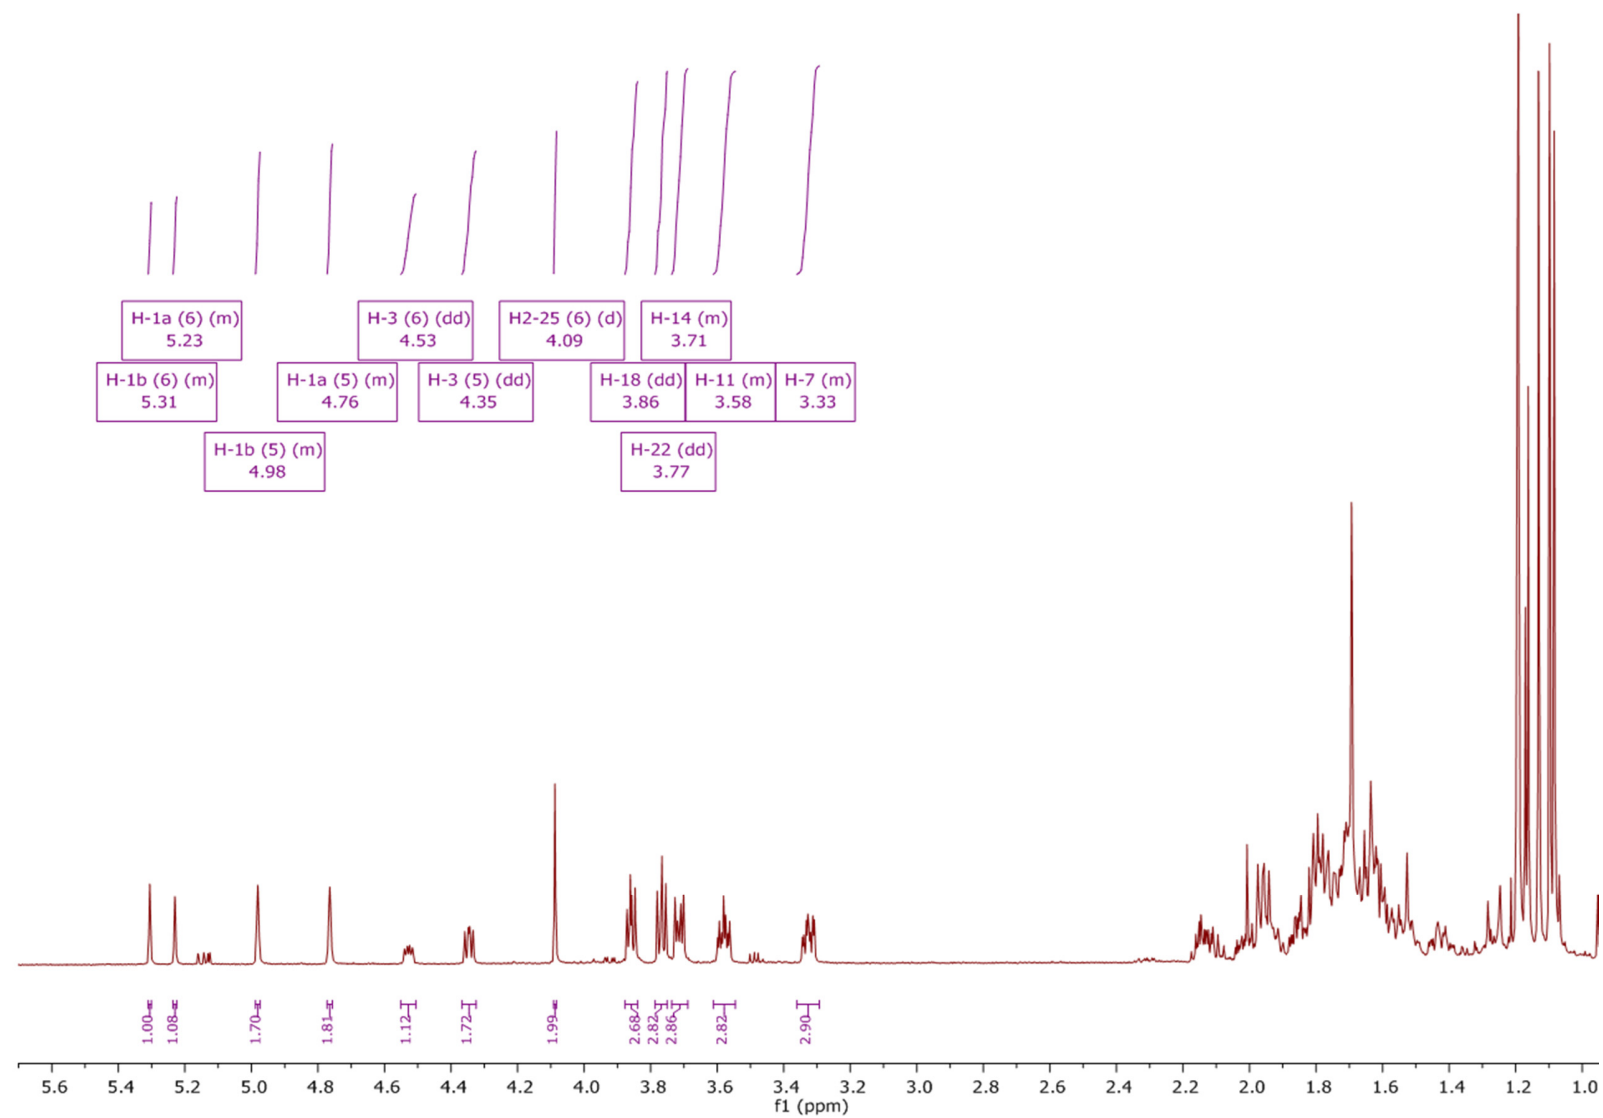

**Figure S25.**  $^1\text{H-NMR}$  spectrum (600MHz,  $\text{CDCl}_3$ , 303K) of compounds 5 and 6

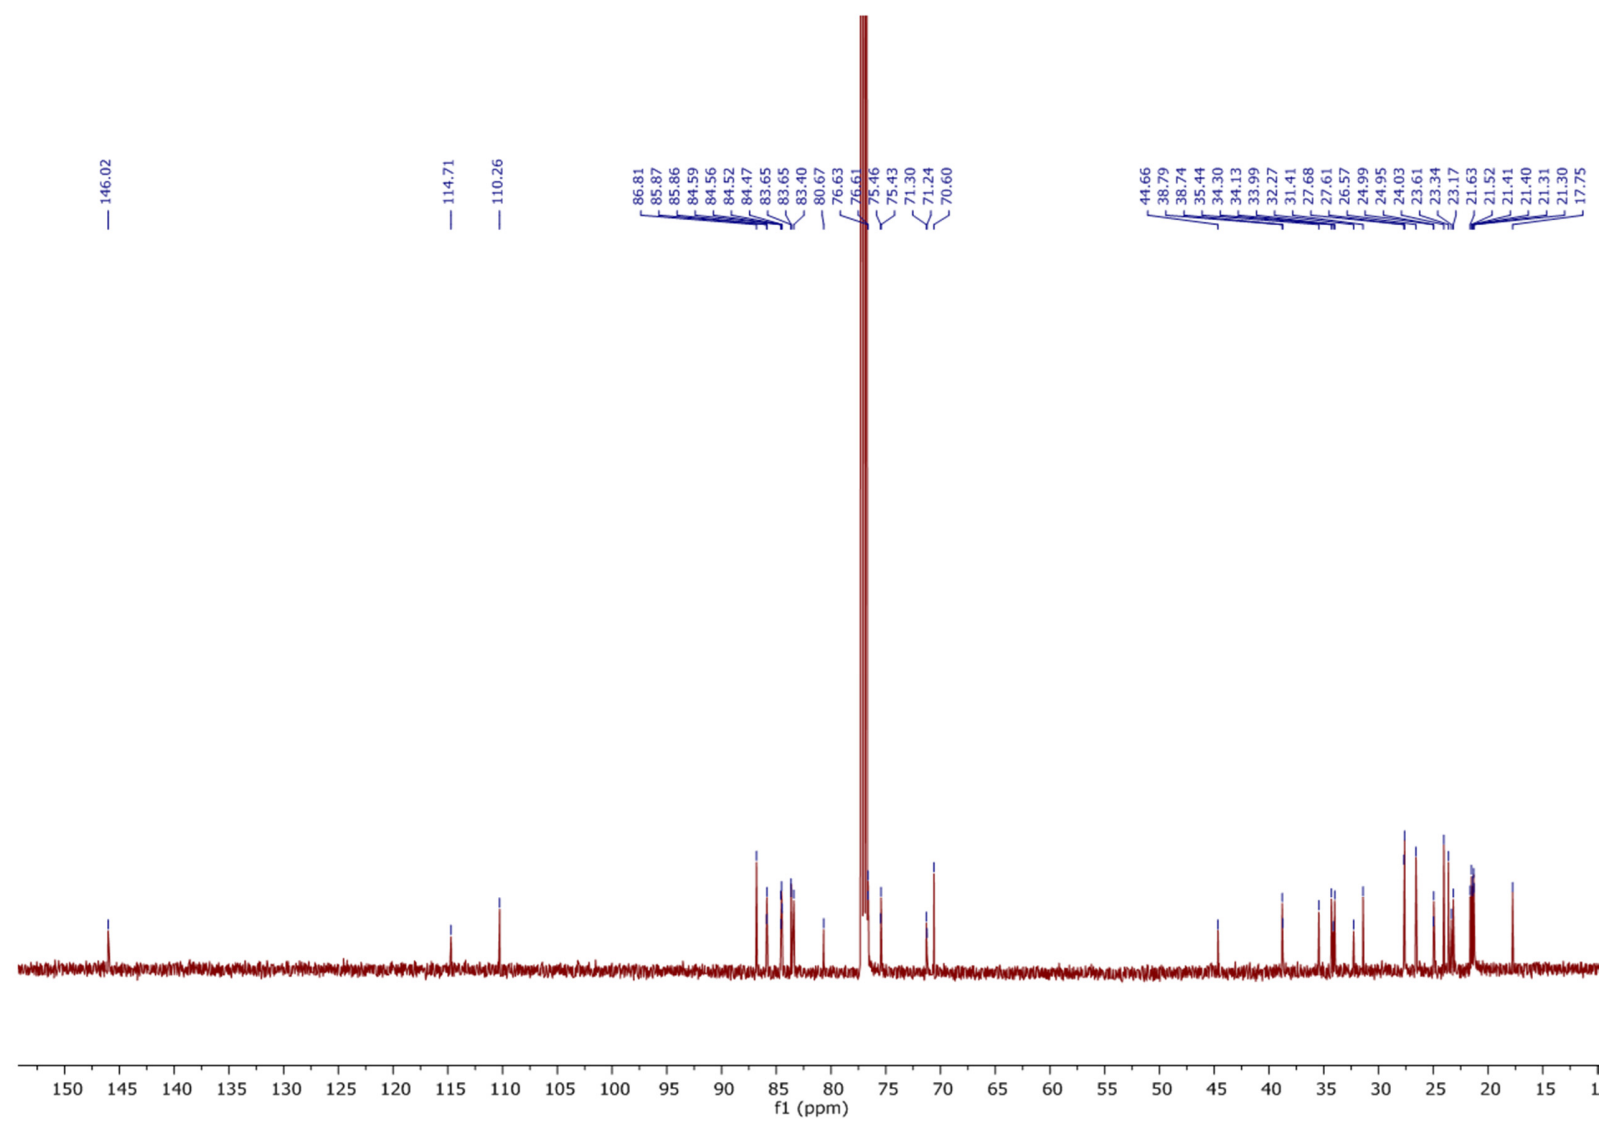

Figure S26.  $^{13}\text{C}$ -NMR spectrum (150MHz,  $\text{CDCl}_3$ , 303K) of compounds 5 and 6

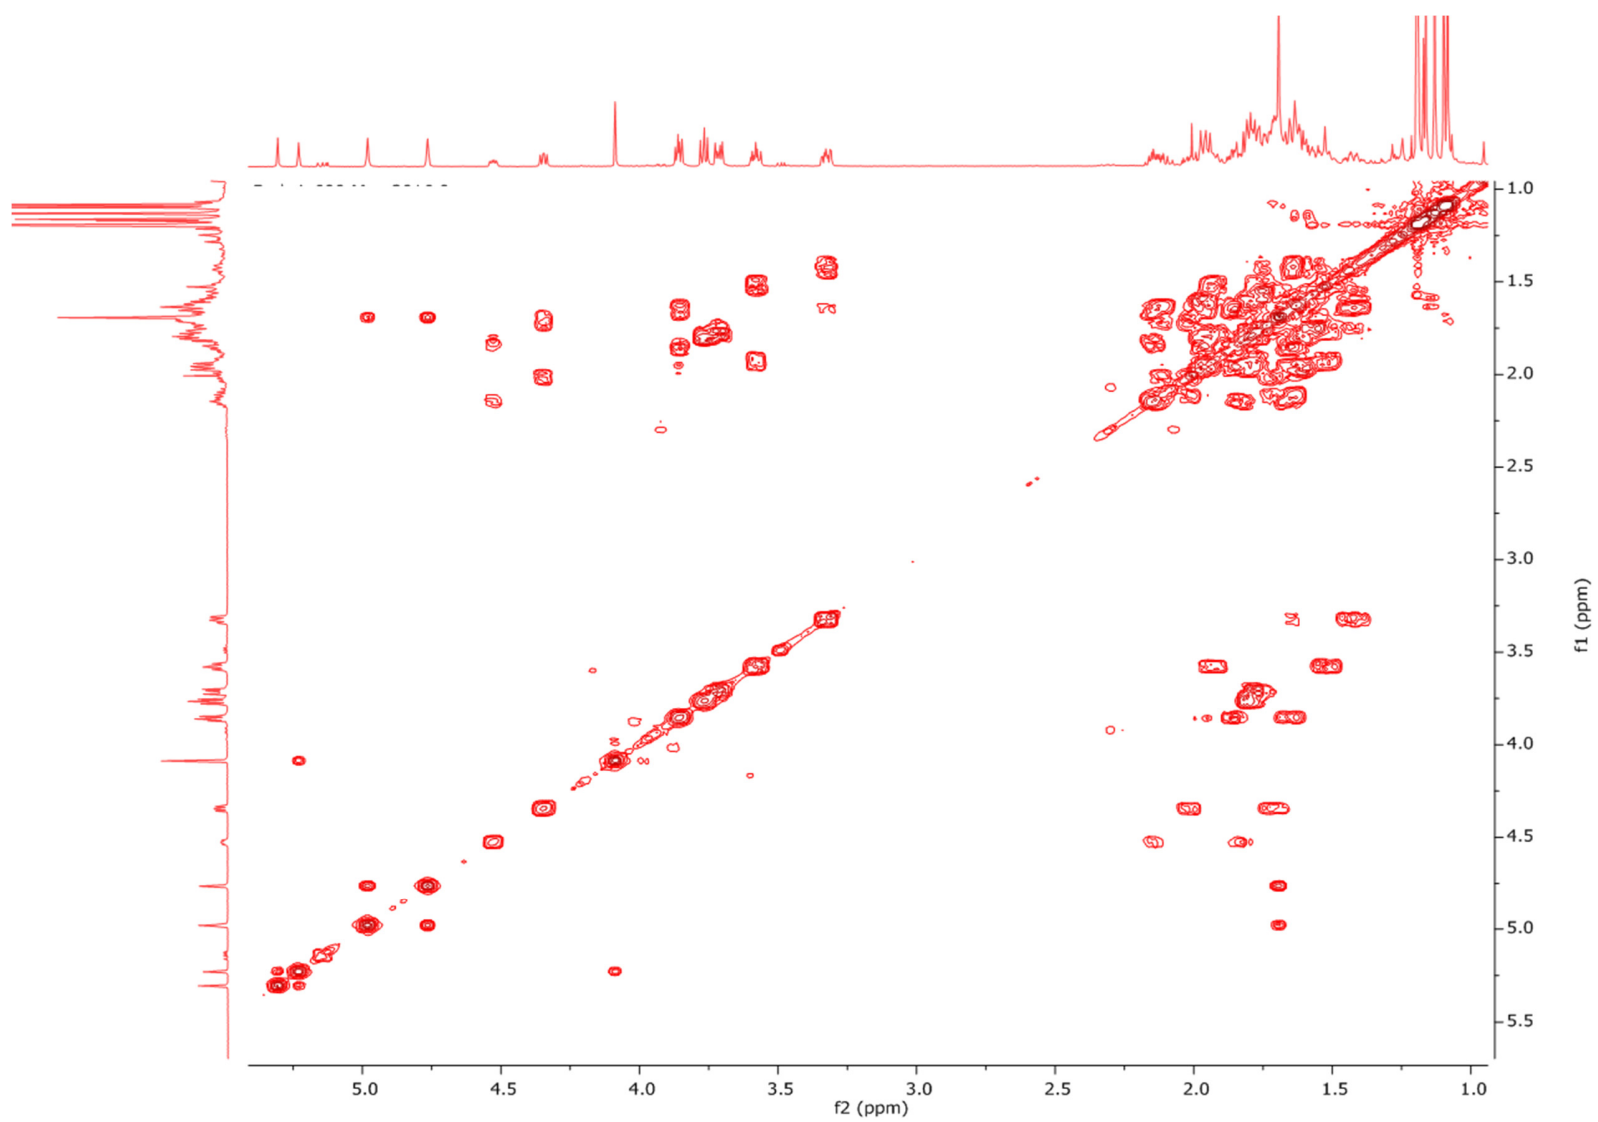

**Figure S27.** <sup>1</sup>H-<sup>1</sup>H COSY NMR spectrum (600MHz, CDCl<sub>3</sub>, 303K) of compounds **5** and **6**

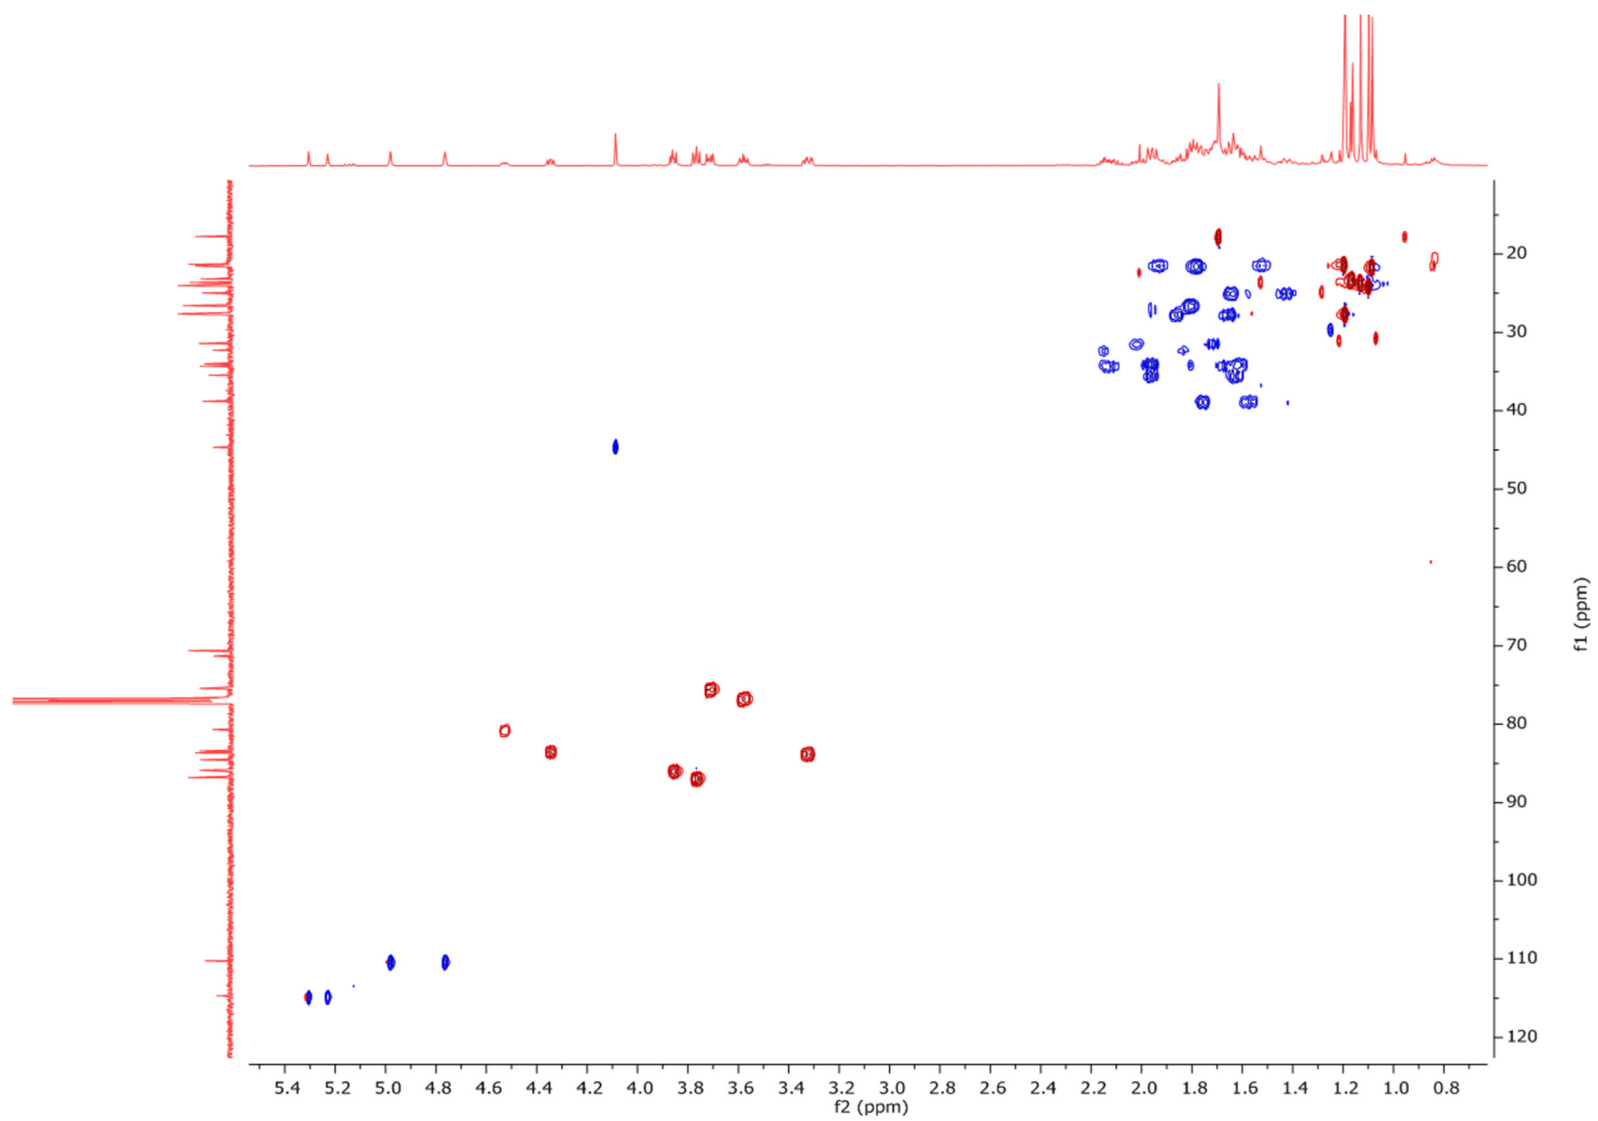

Figure S28. HSQC-DEPT NMR spectrum (600MHz, CDCl<sub>3</sub>, 303K) of compounds 5 and 6



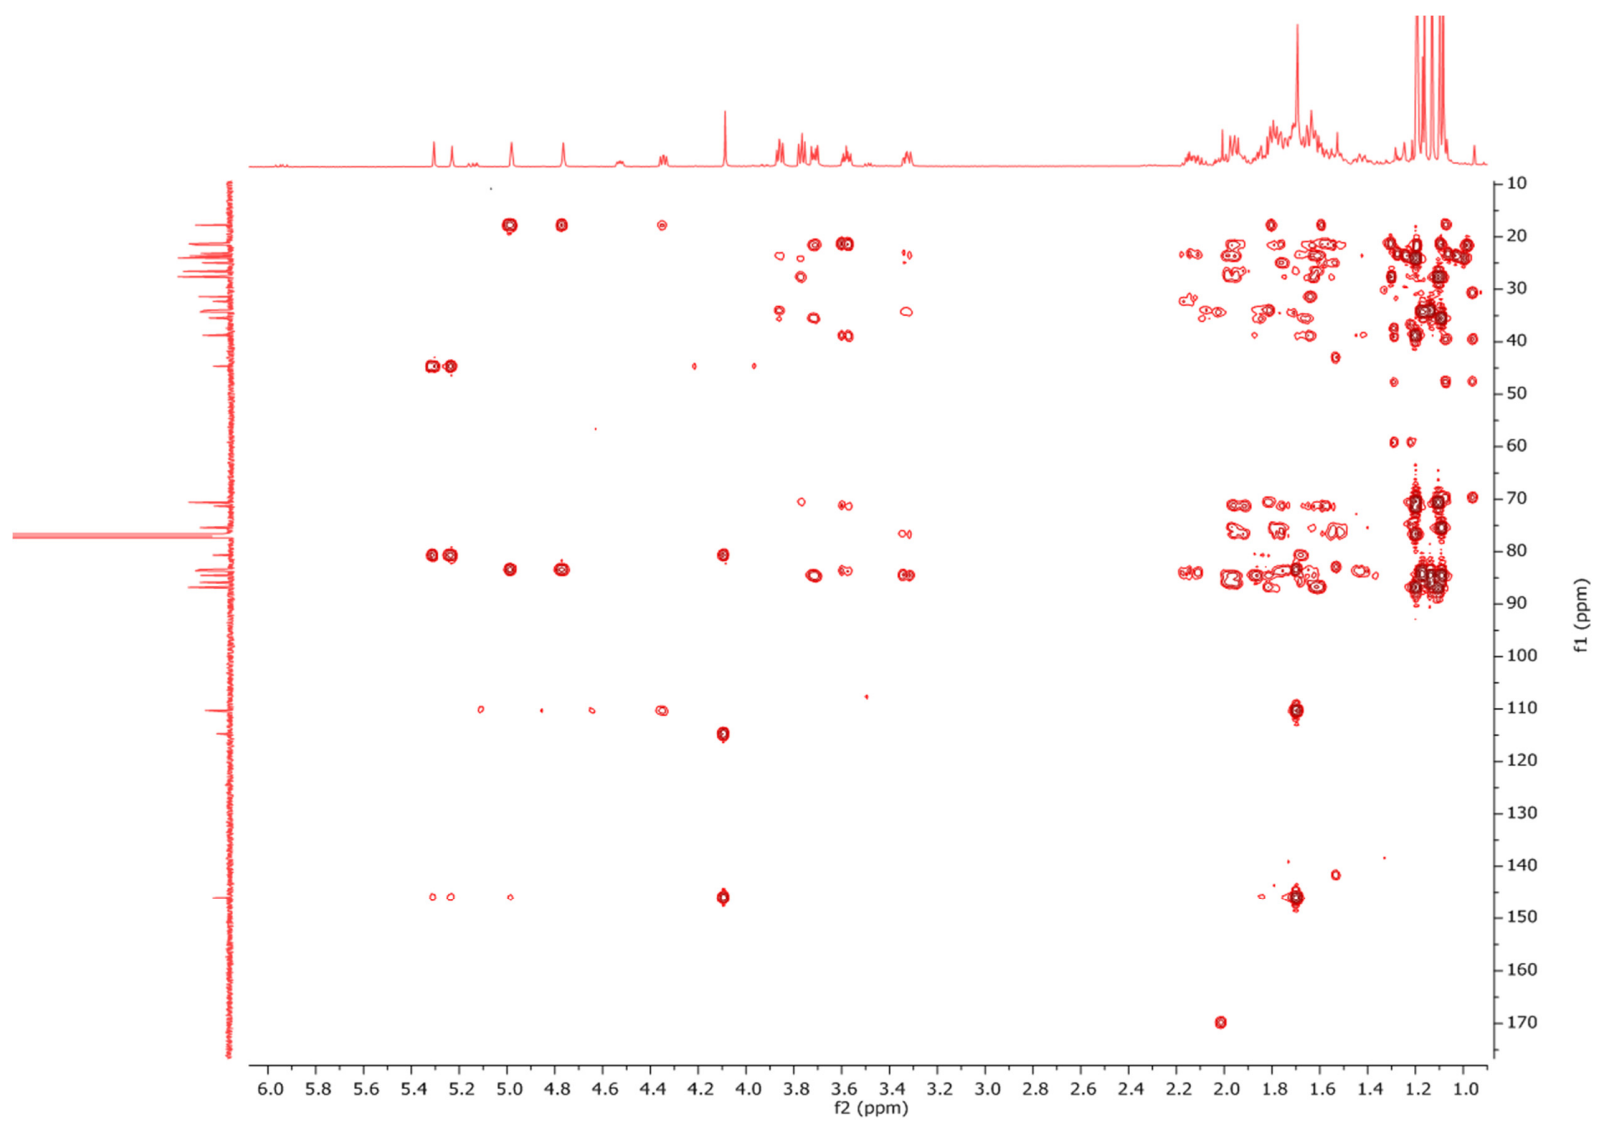

Figure S29. HMBC NMR spectrum (600MHz, CDCl<sub>3</sub>, 303K) of compounds 5 and 6

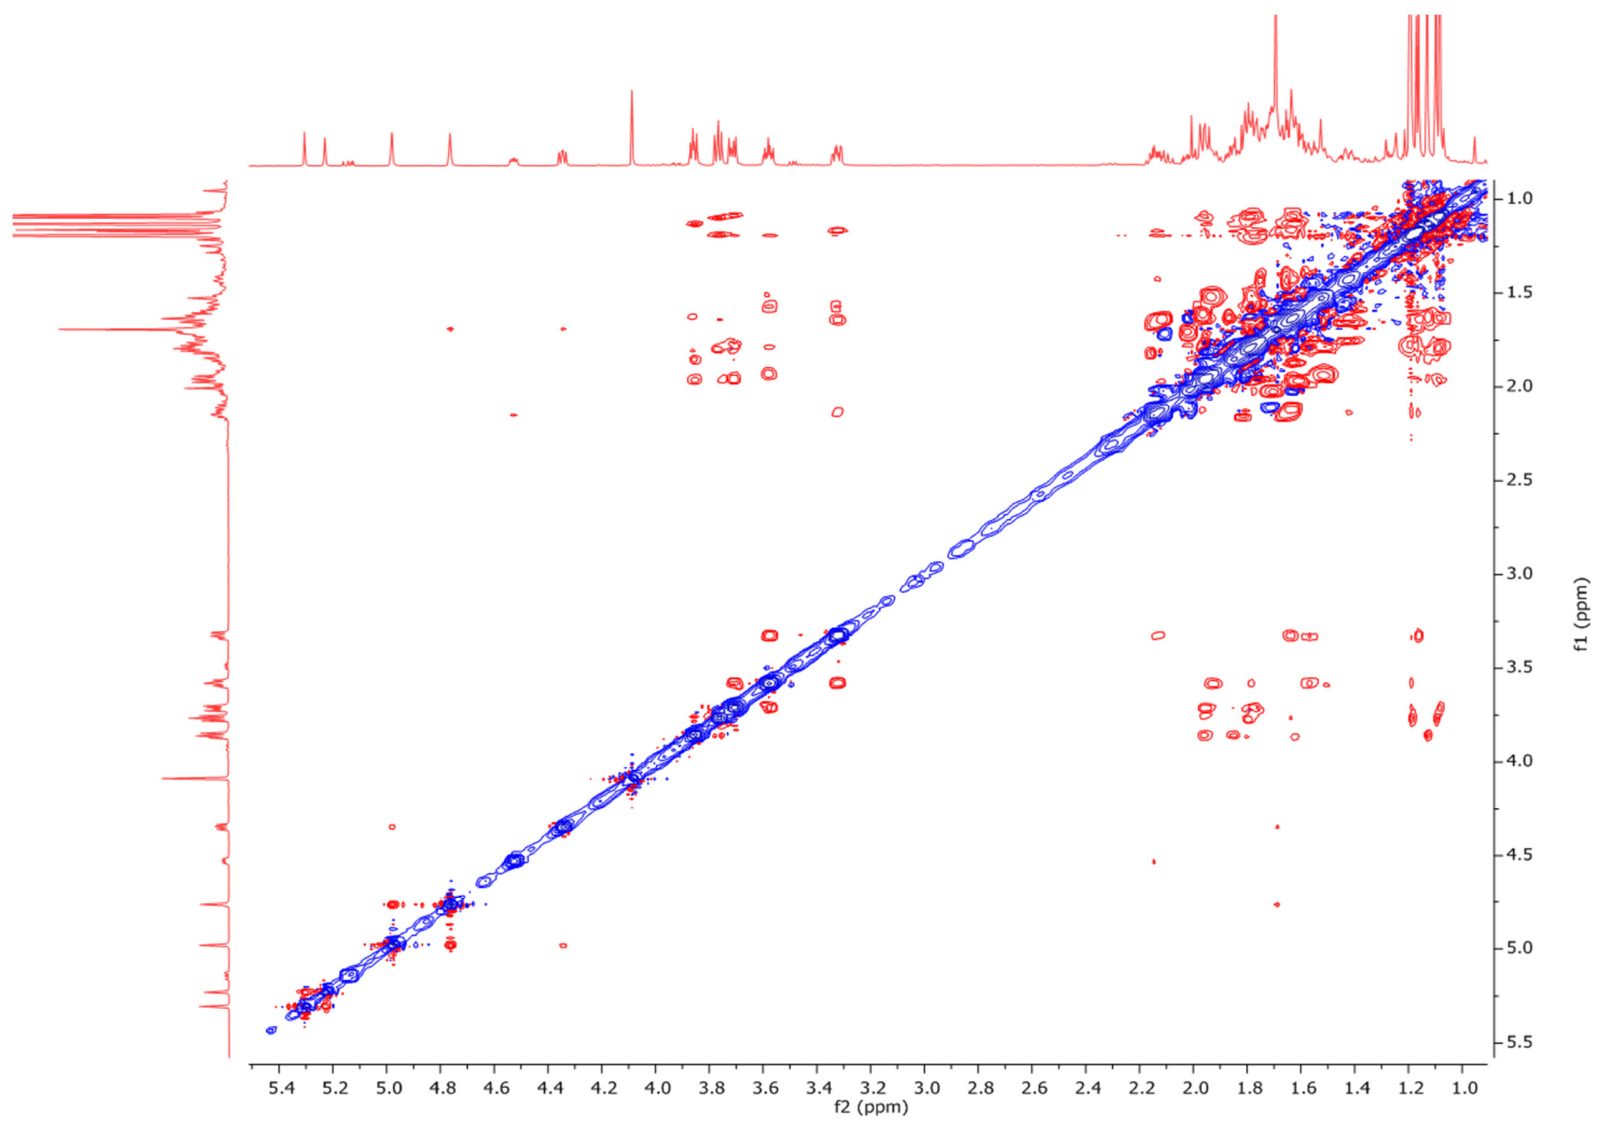

**Figure S30.** ROESY NMR spectrum (600MHz, CDCl<sub>3</sub>, 303K) of compounds **5** and **6**

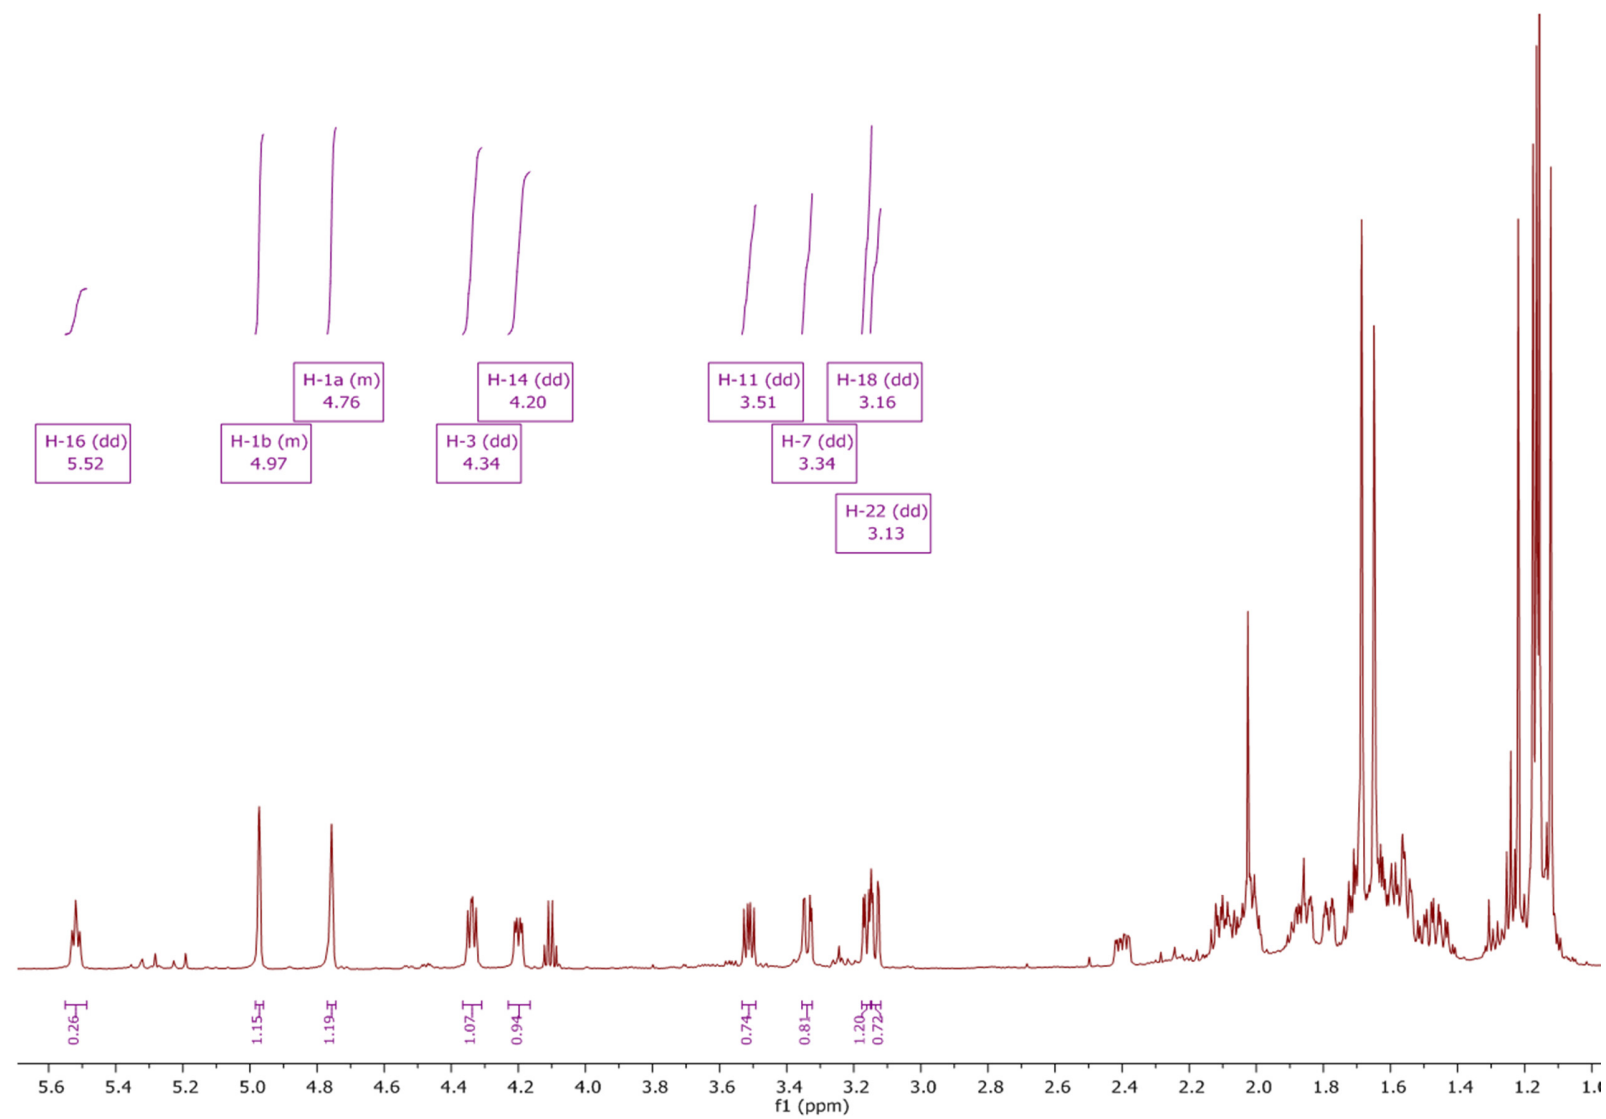

Figure S31. <sup>1</sup>H-NMR spectrum (600MHz, CDCl<sub>3</sub>, 303K) of compound 7

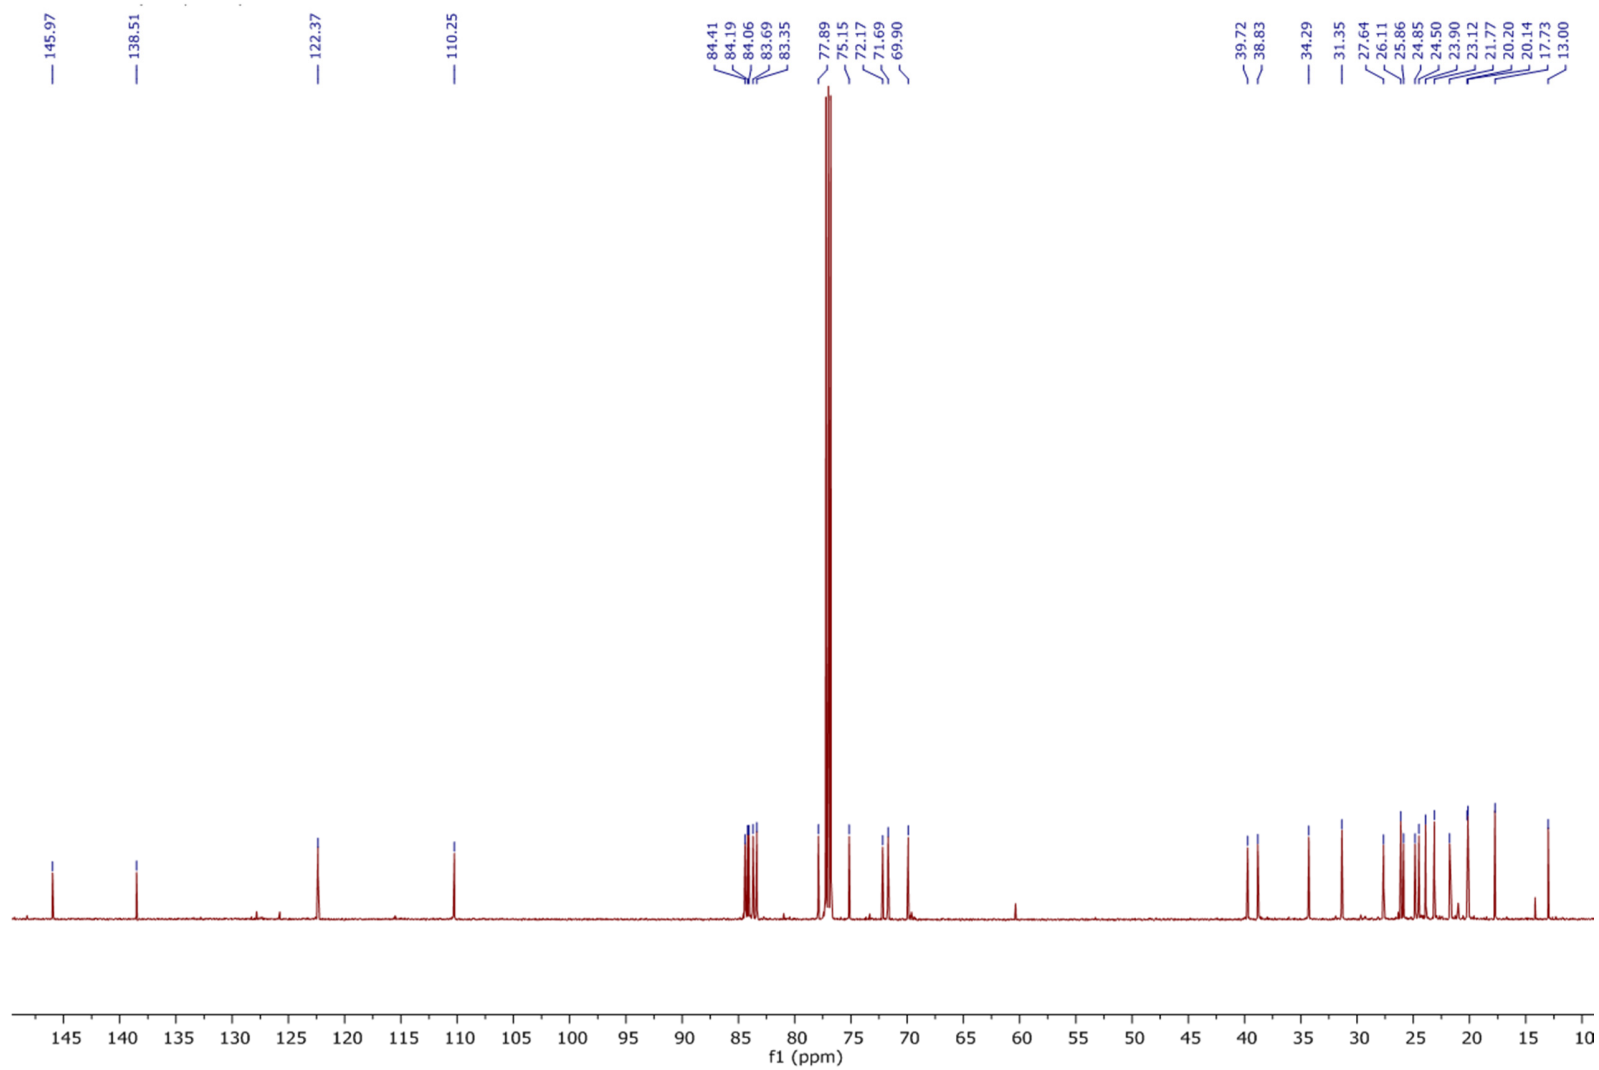

Figure S32.  $^{13}\text{C}$ -NMR spectrum (150MHz,  $\text{CDCl}_3$ , 303K) of compound 7

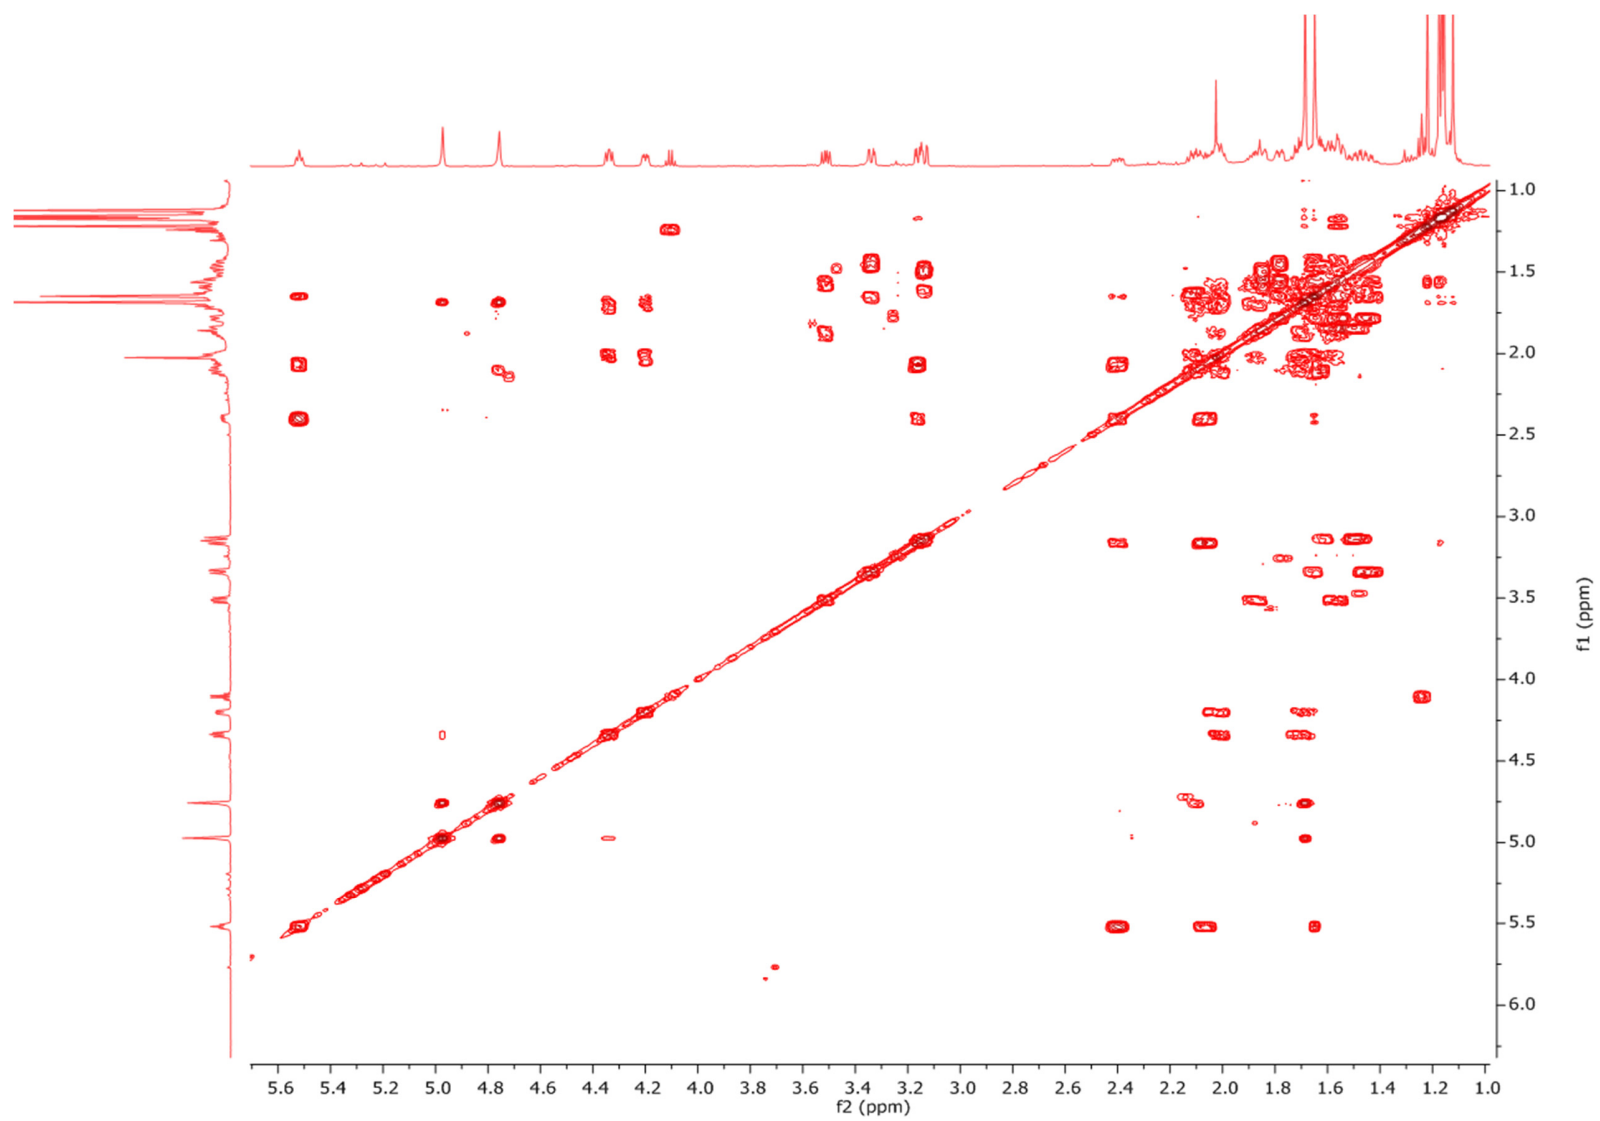

**Figure S33.**  $^1\text{H}$ - $^1\text{H}$  COSY NMR spectrum (600MHz,  $\text{CDCl}_3$ , 303K) of compound 7

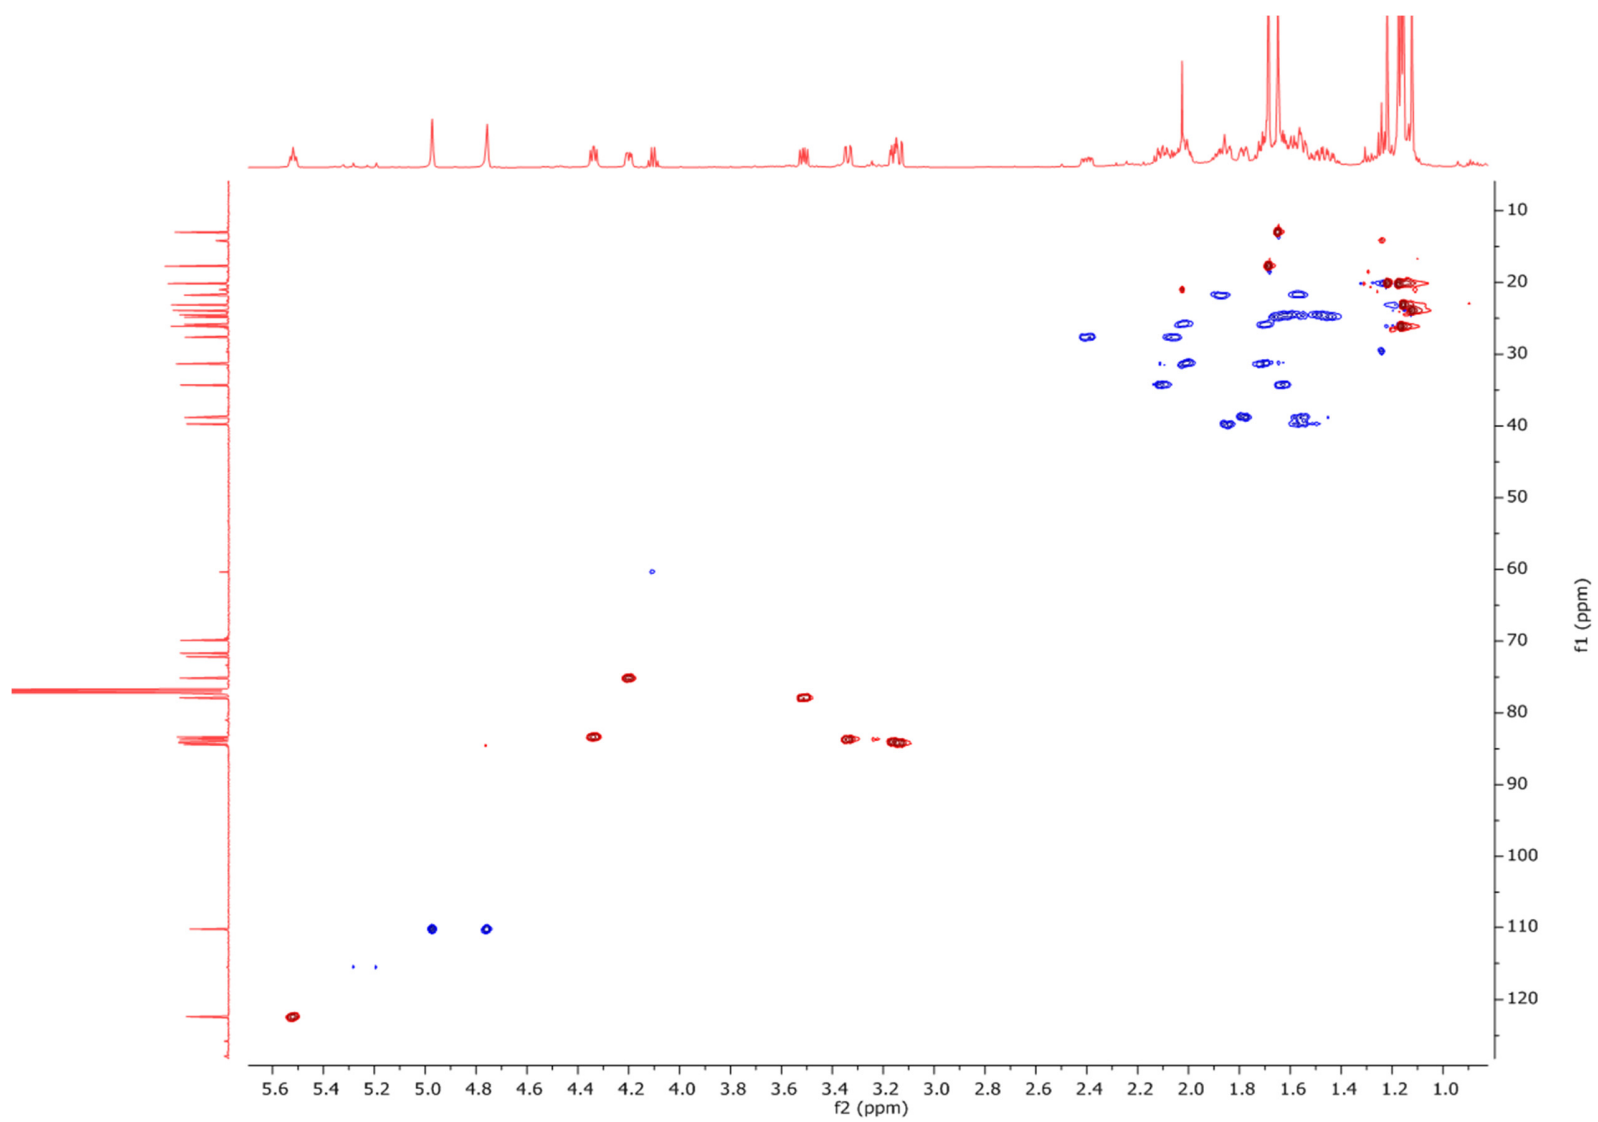

**Figure S34.** HSQC-DEPT NMR spectrum (600MHz,  $\text{CDCl}_3$ , 303K) of compound 7

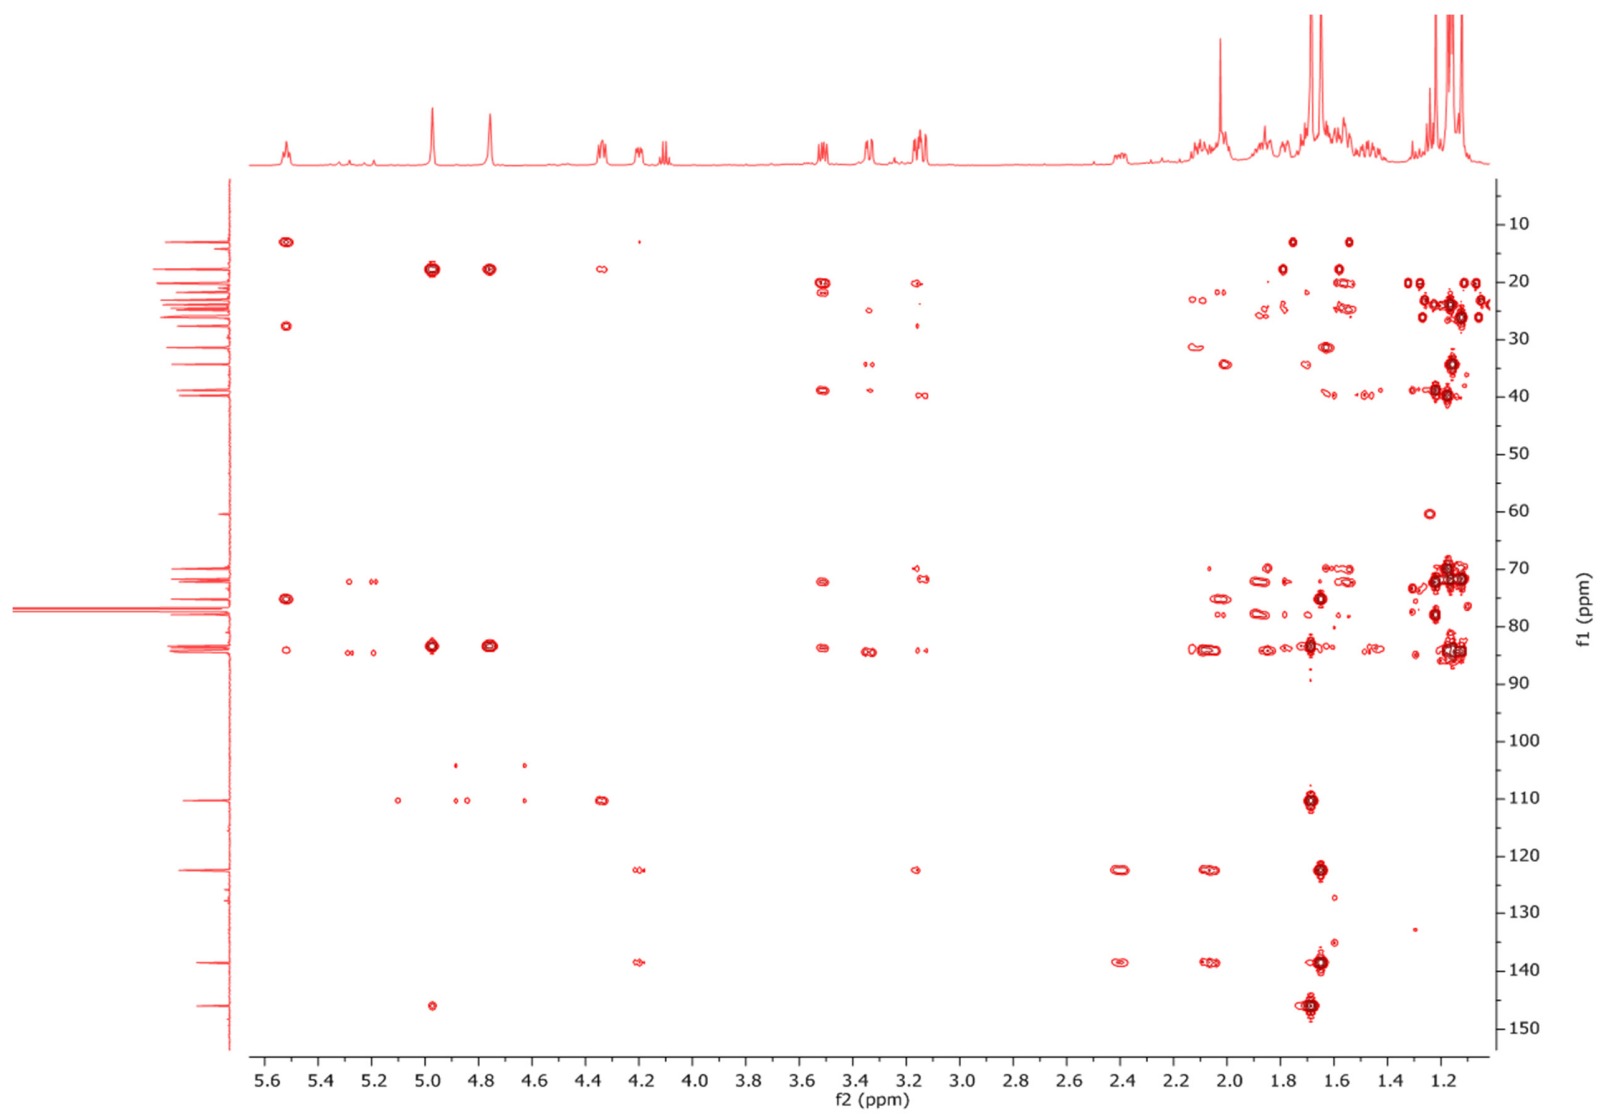

**Figure S35.** HMBC NMR spectrum (600MHz, CDCl<sub>3</sub>, 303K) of compound 7

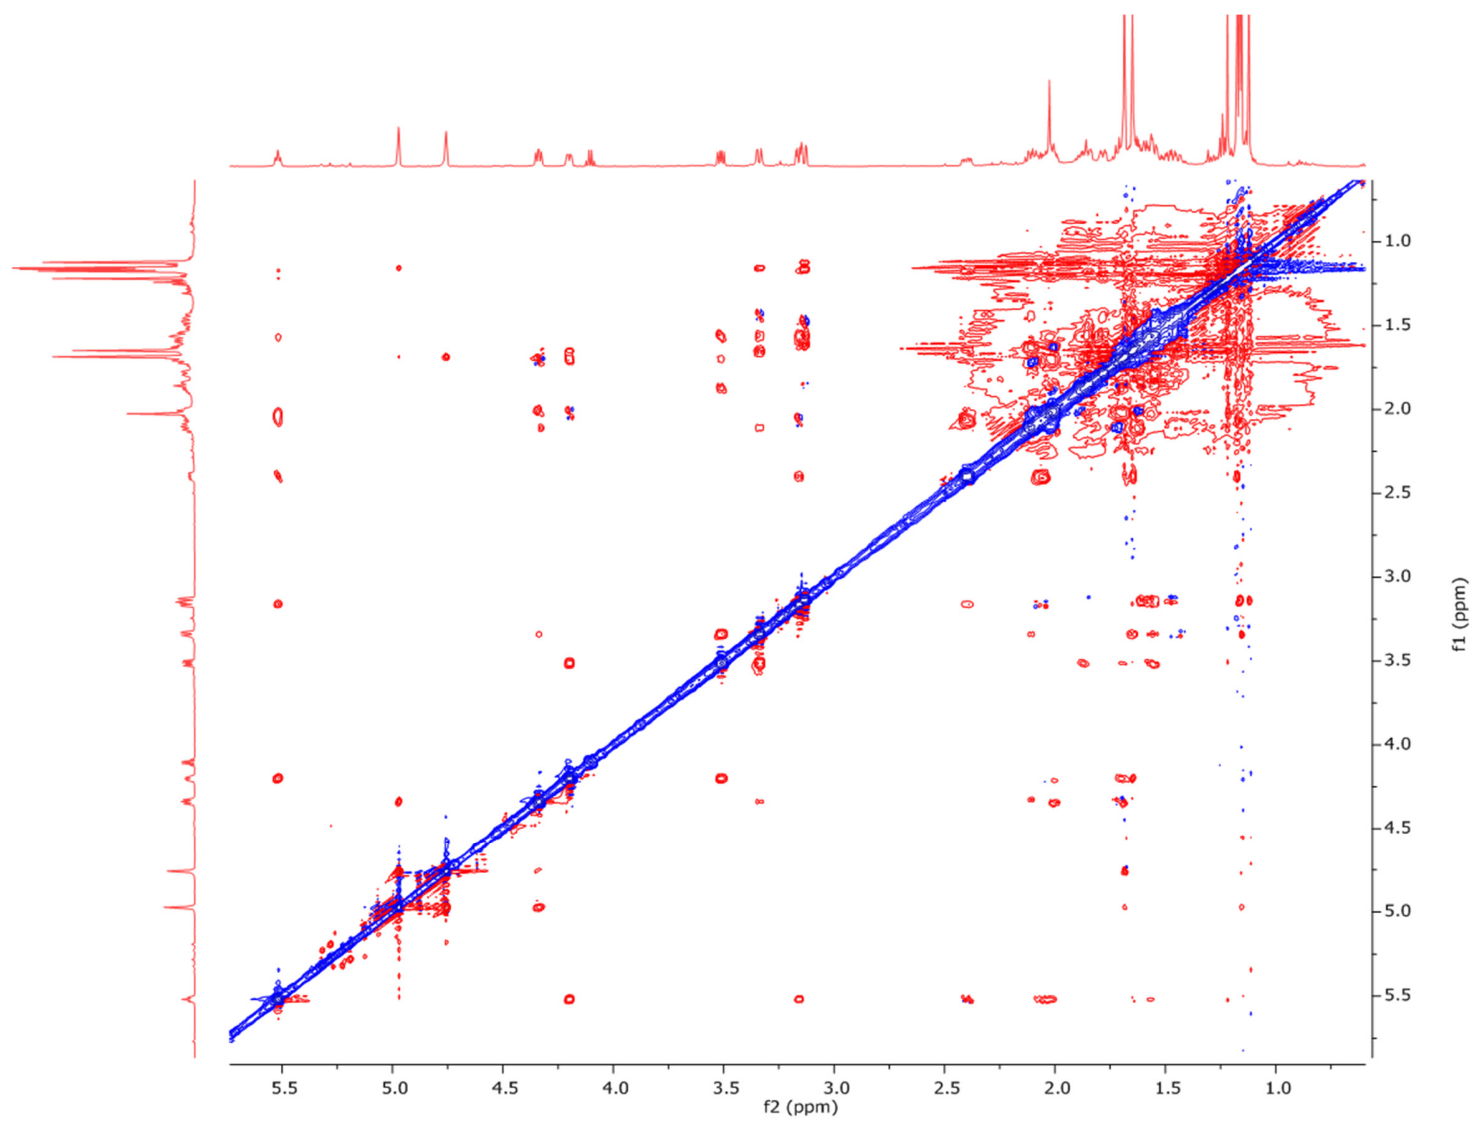

**Figure S36.** ROESY NMR spectrum (600MHz, CDCl<sub>3</sub>, 303K) of compound **7**



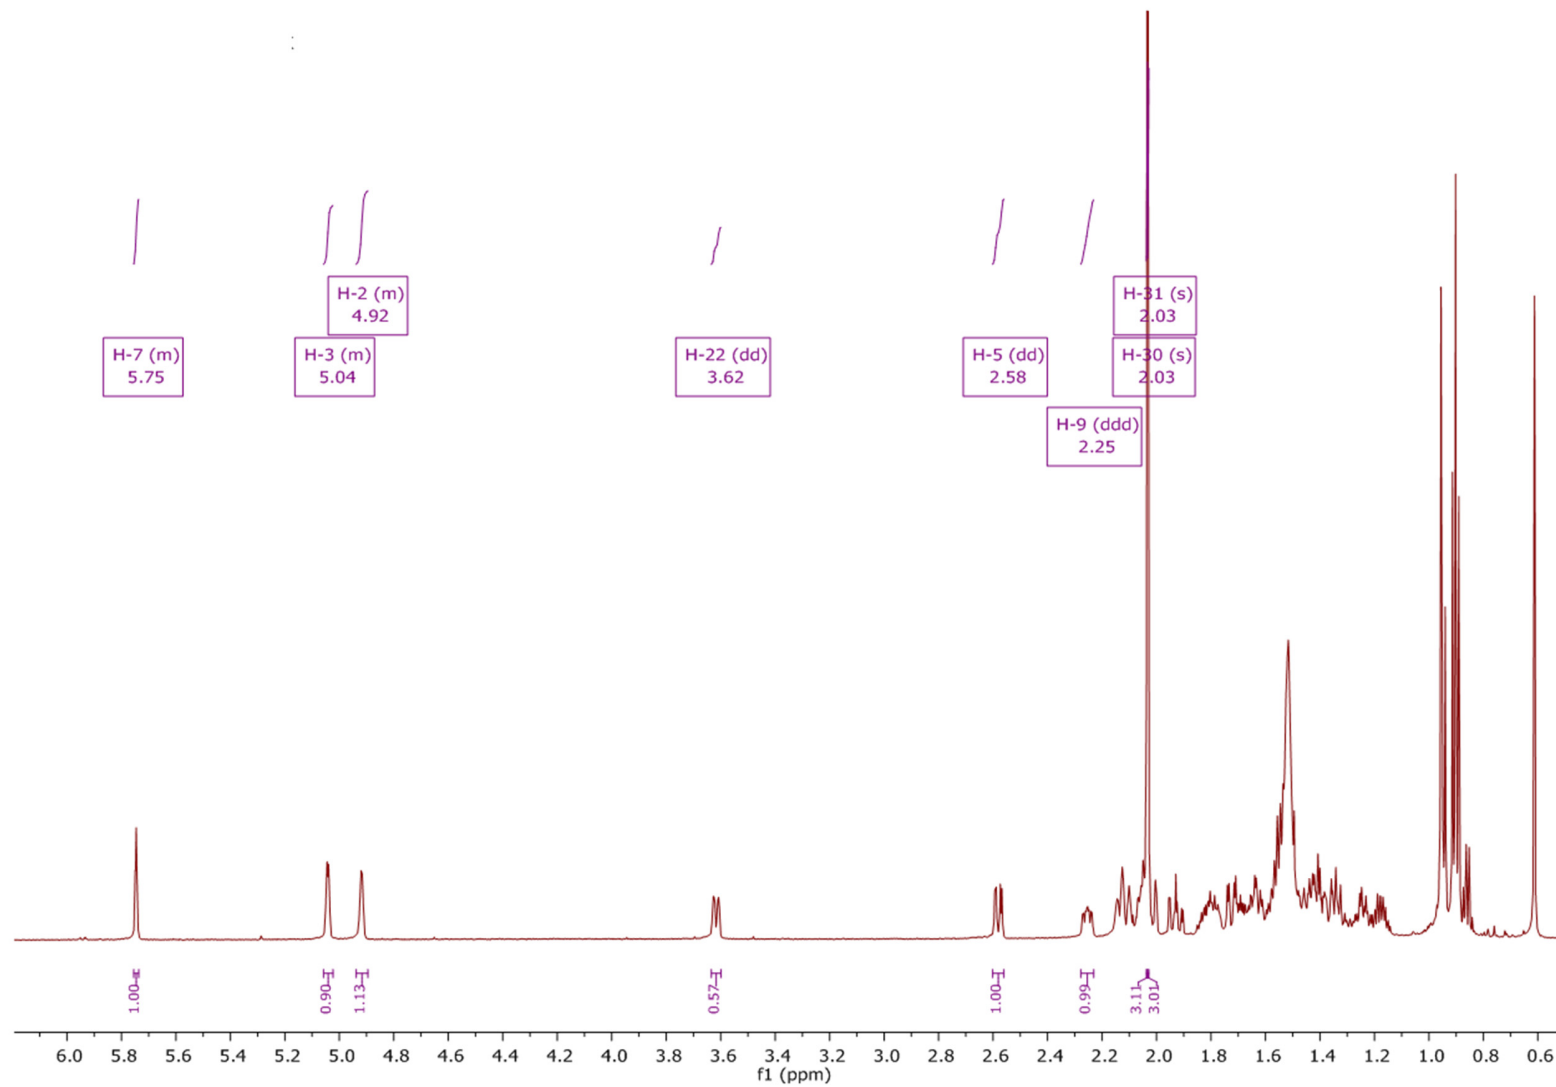

Figure S37. <sup>1</sup>H-NMR spectrum (600MHz, CDCl<sub>3</sub>, 303K) of compound 8

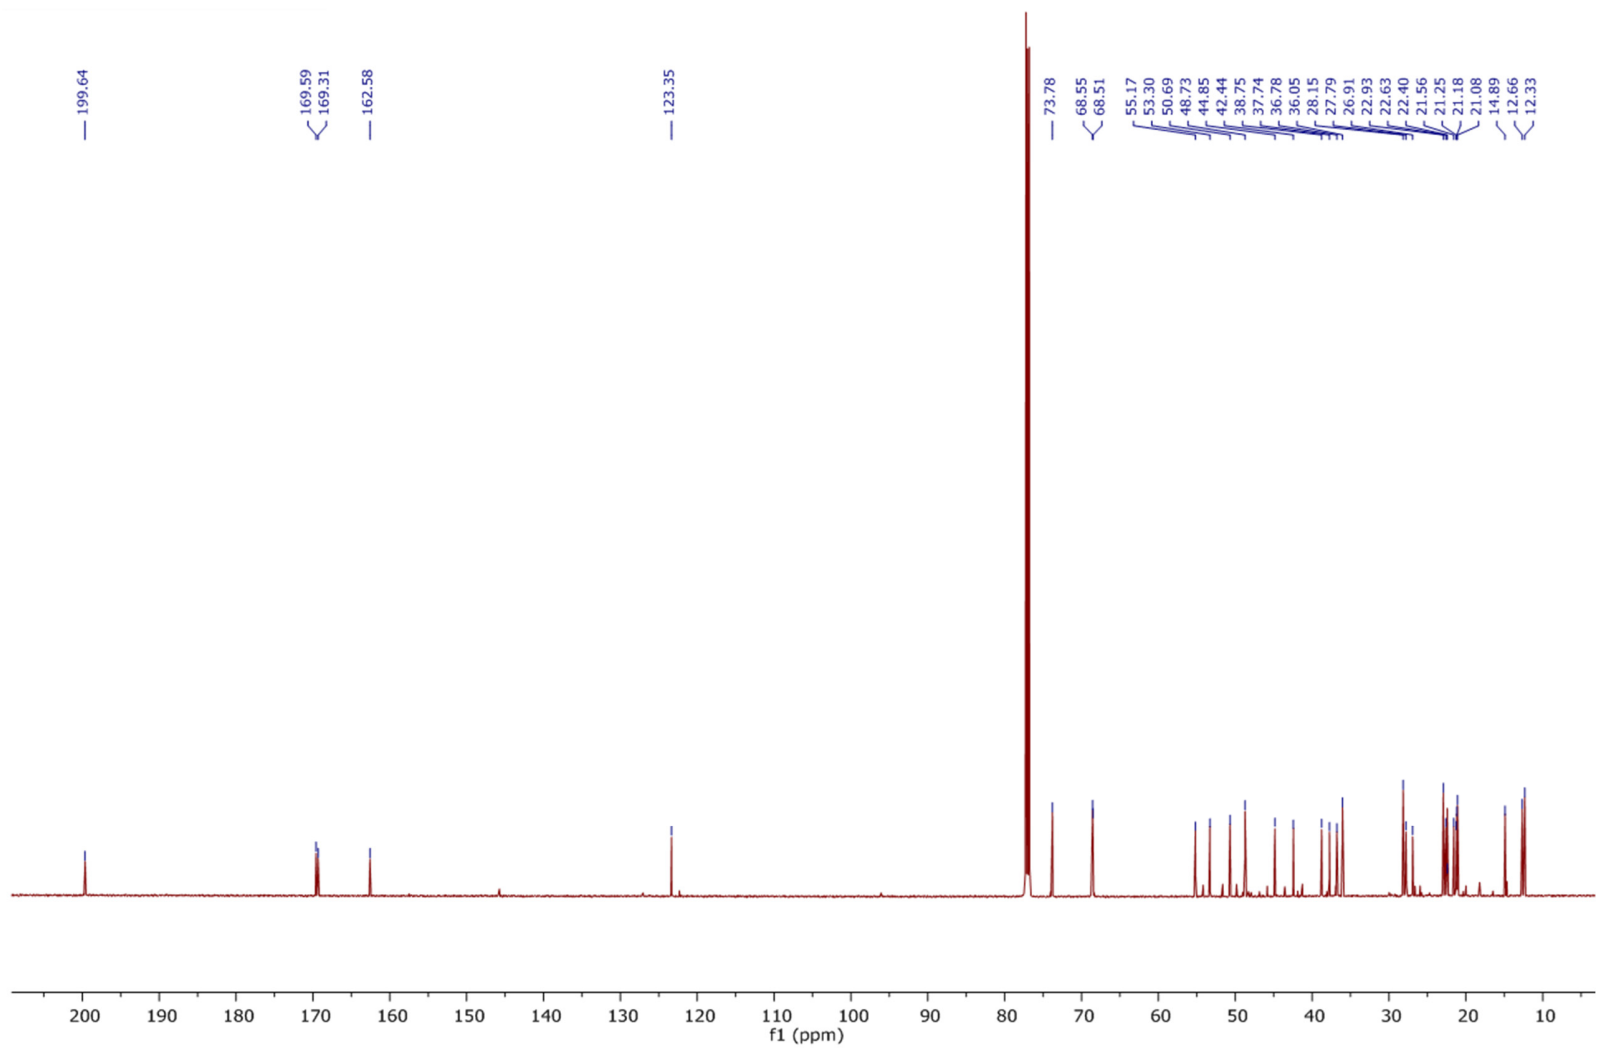

Figure S38.  $^{13}\text{C}$ -NMR spectrum (150MHz,  $\text{CDCl}_3$ , 303K) of compound 8

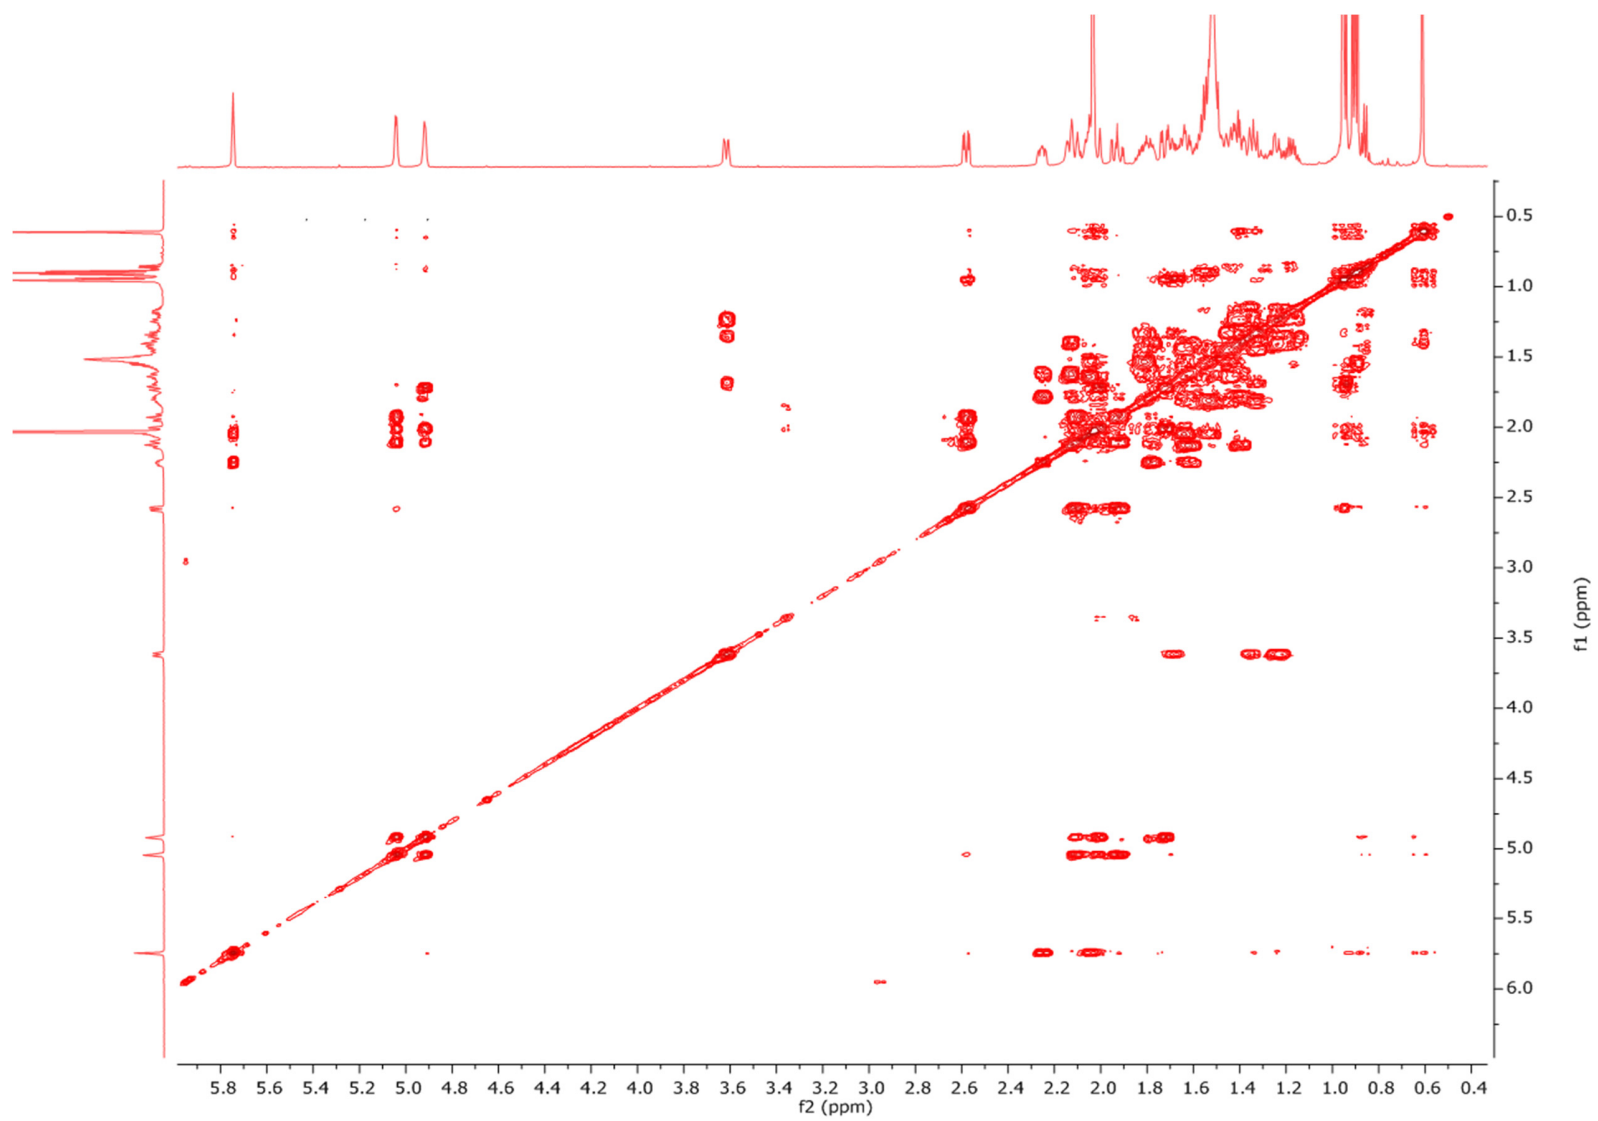

**Figure S39.**  $^1\text{H}$ - $^1\text{H}$  COSY NMR spectrum (600MHz,  $\text{CDCl}_3$ , 303K) of compound 8

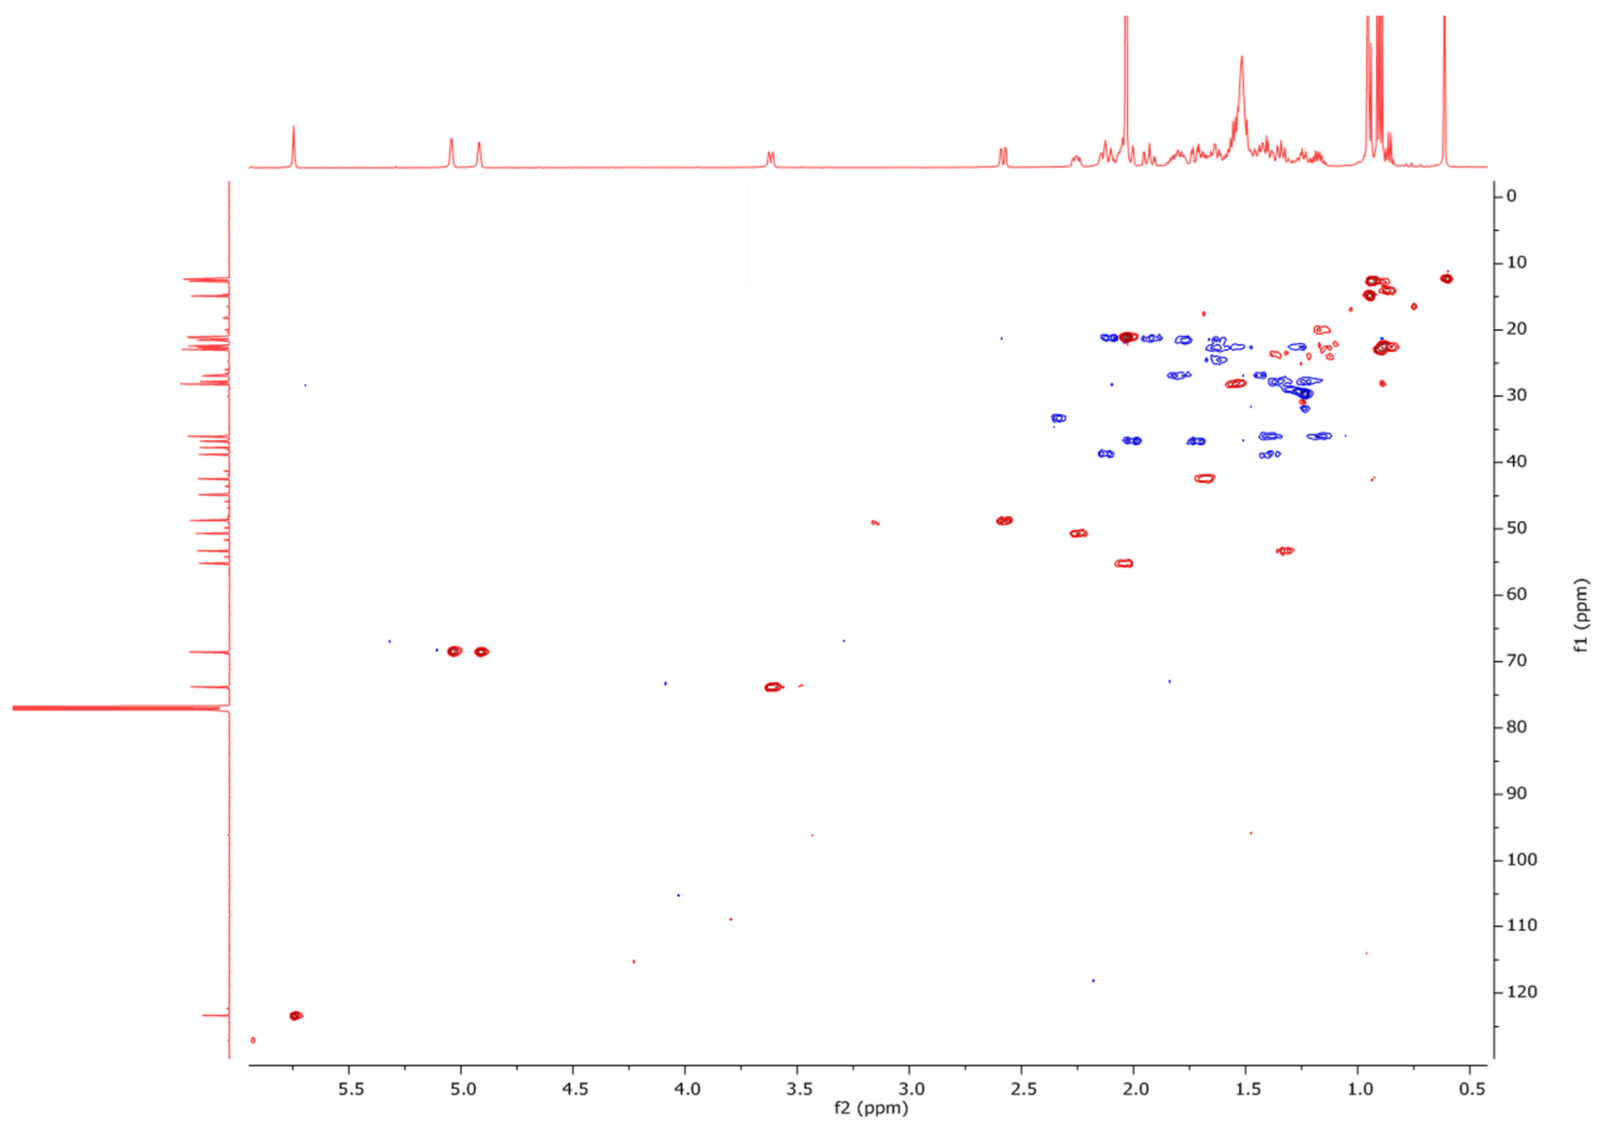

**Figure S40.** HSQC-DEPT NMR spectrum (600MHz, CDCl<sub>3</sub>, 303K) of compound **8**

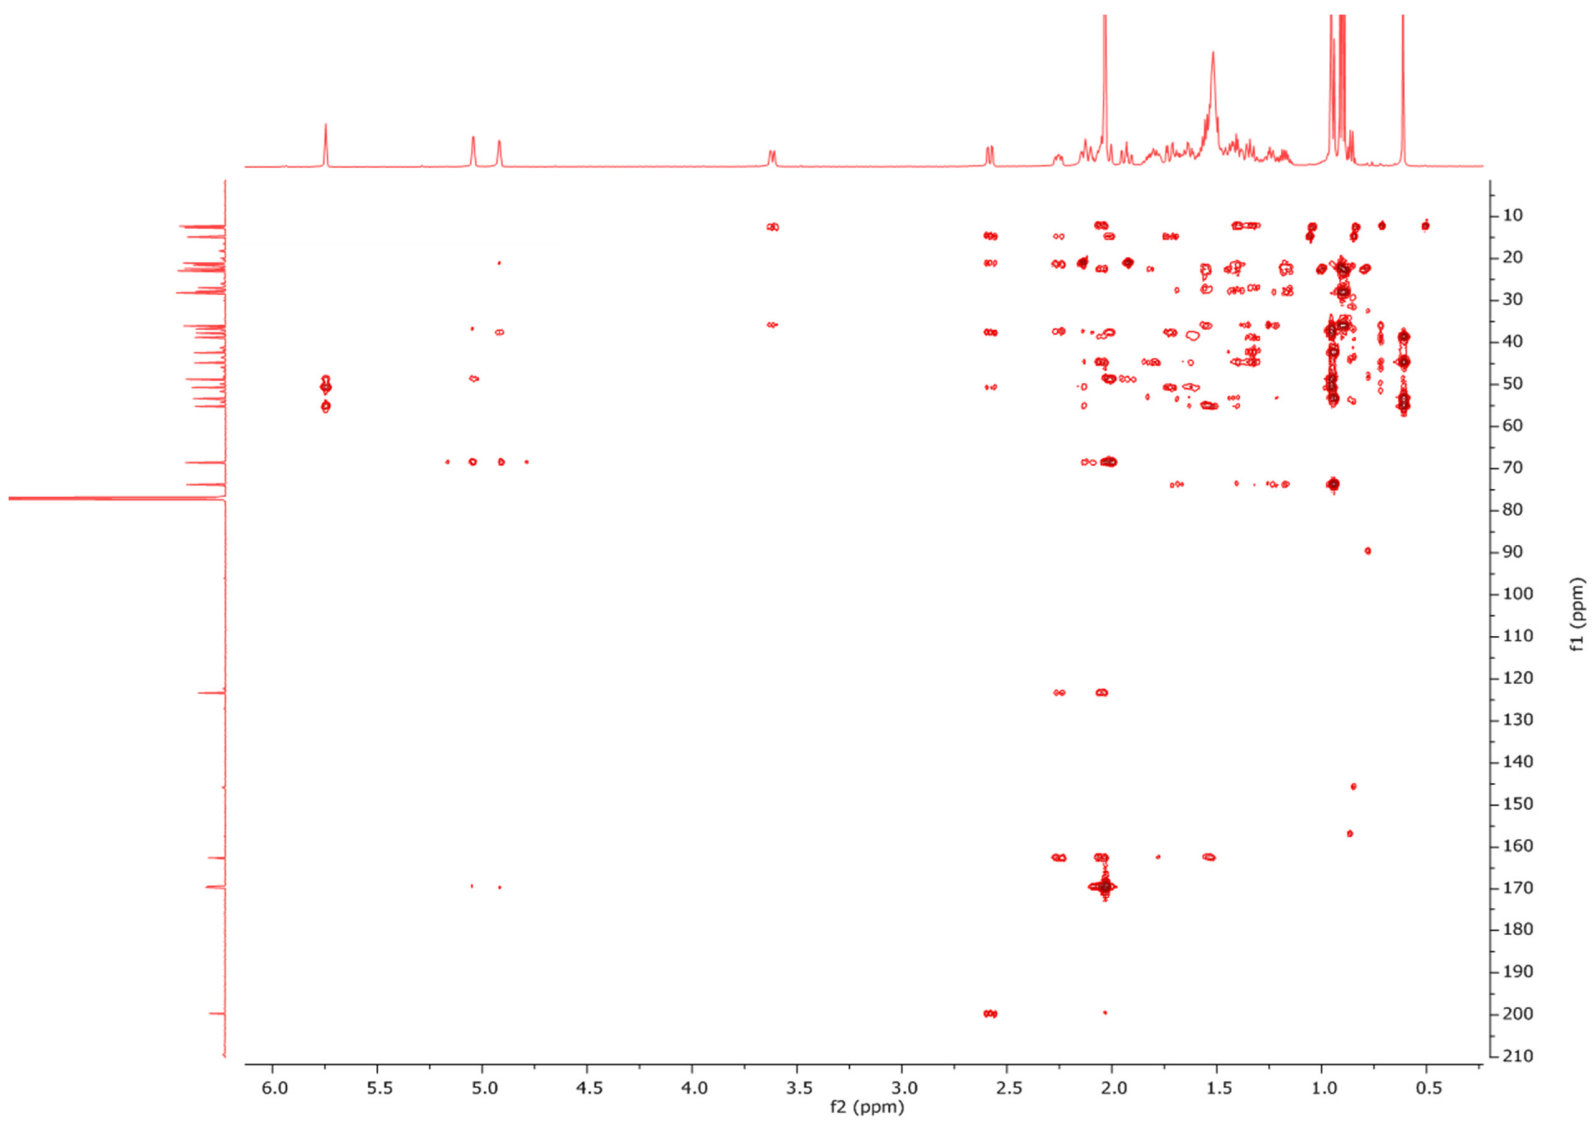

**Figure S41.** HMBC NMR spectrum (600MHz, CDCl<sub>3</sub>, 303K) of compound **8**

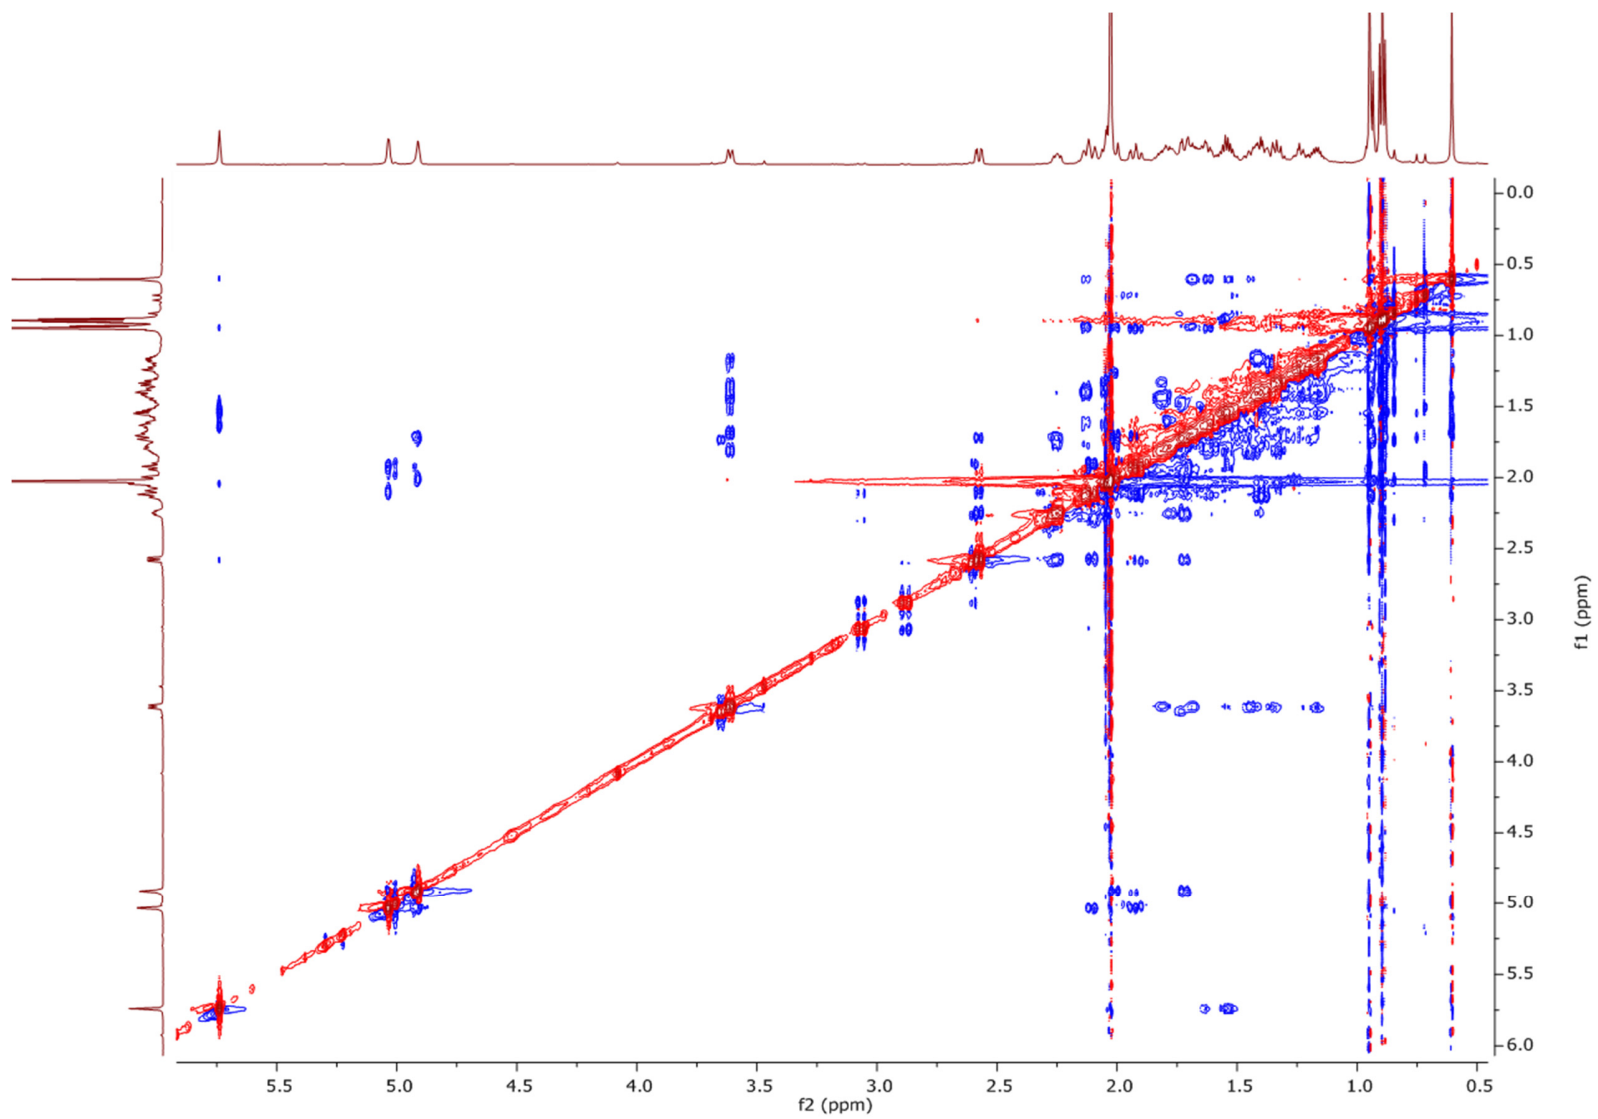

**Figure S42.** NOESY NMR spectrum (600MHz, CDCl<sub>3</sub>, 303K) of compound **8**

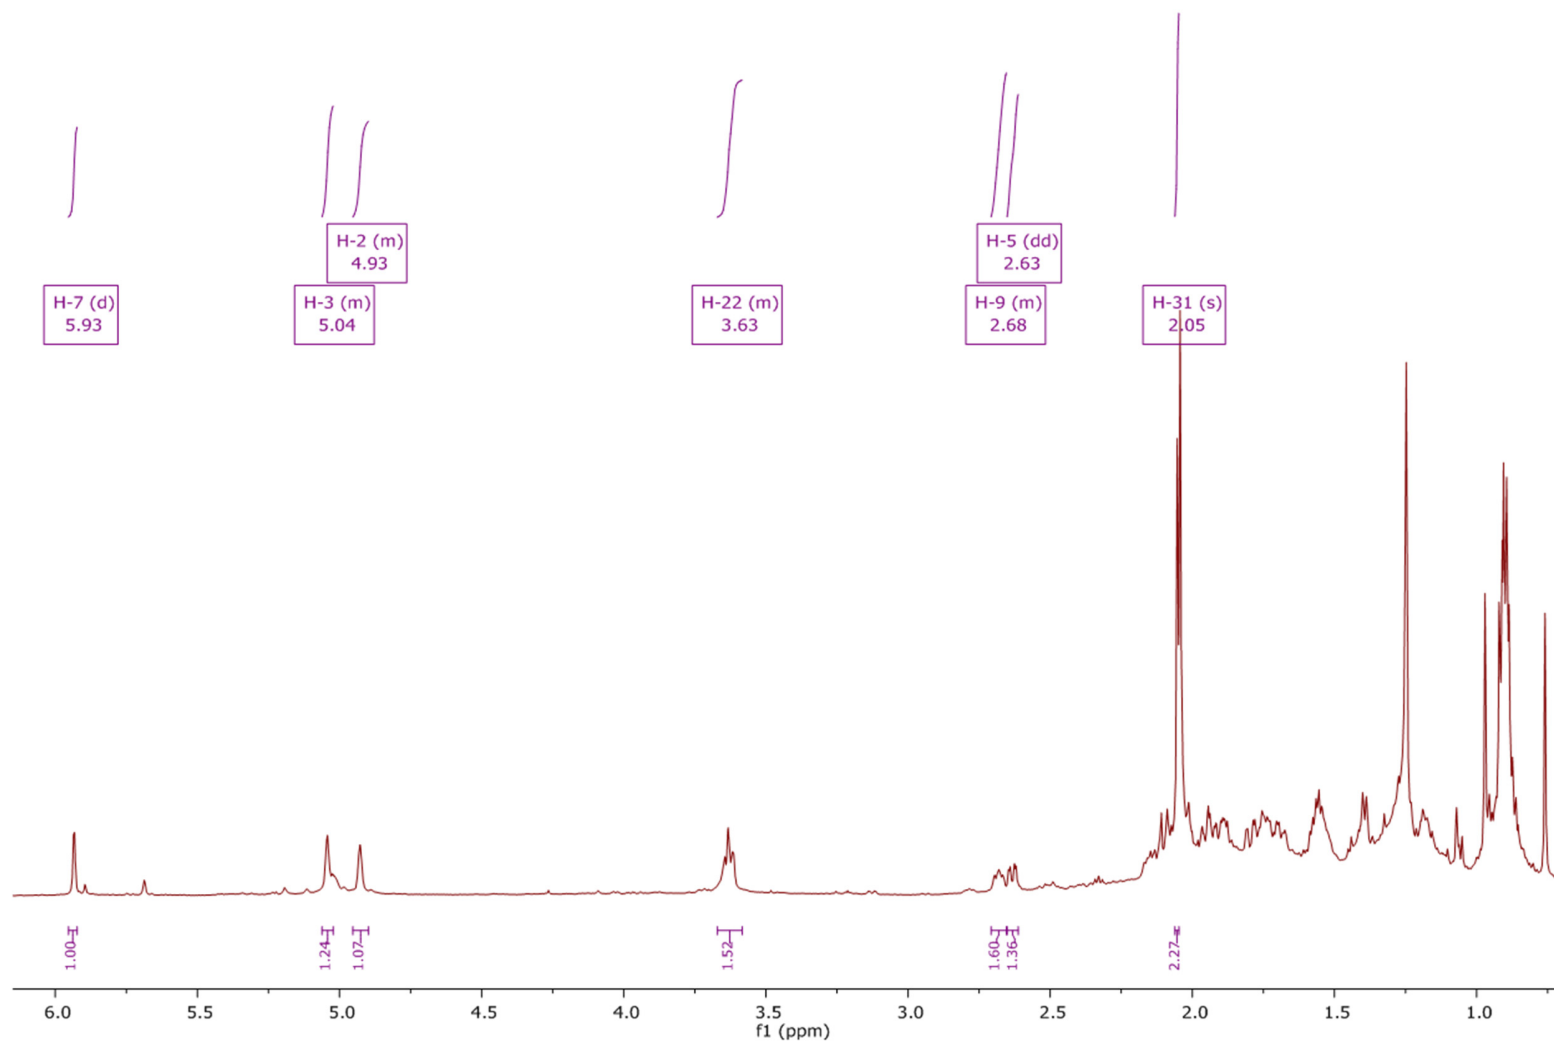

Figure S43. <sup>1</sup>H-NMR spectrum (600MHz, CDCl<sub>3</sub>, 303K) of compound 9

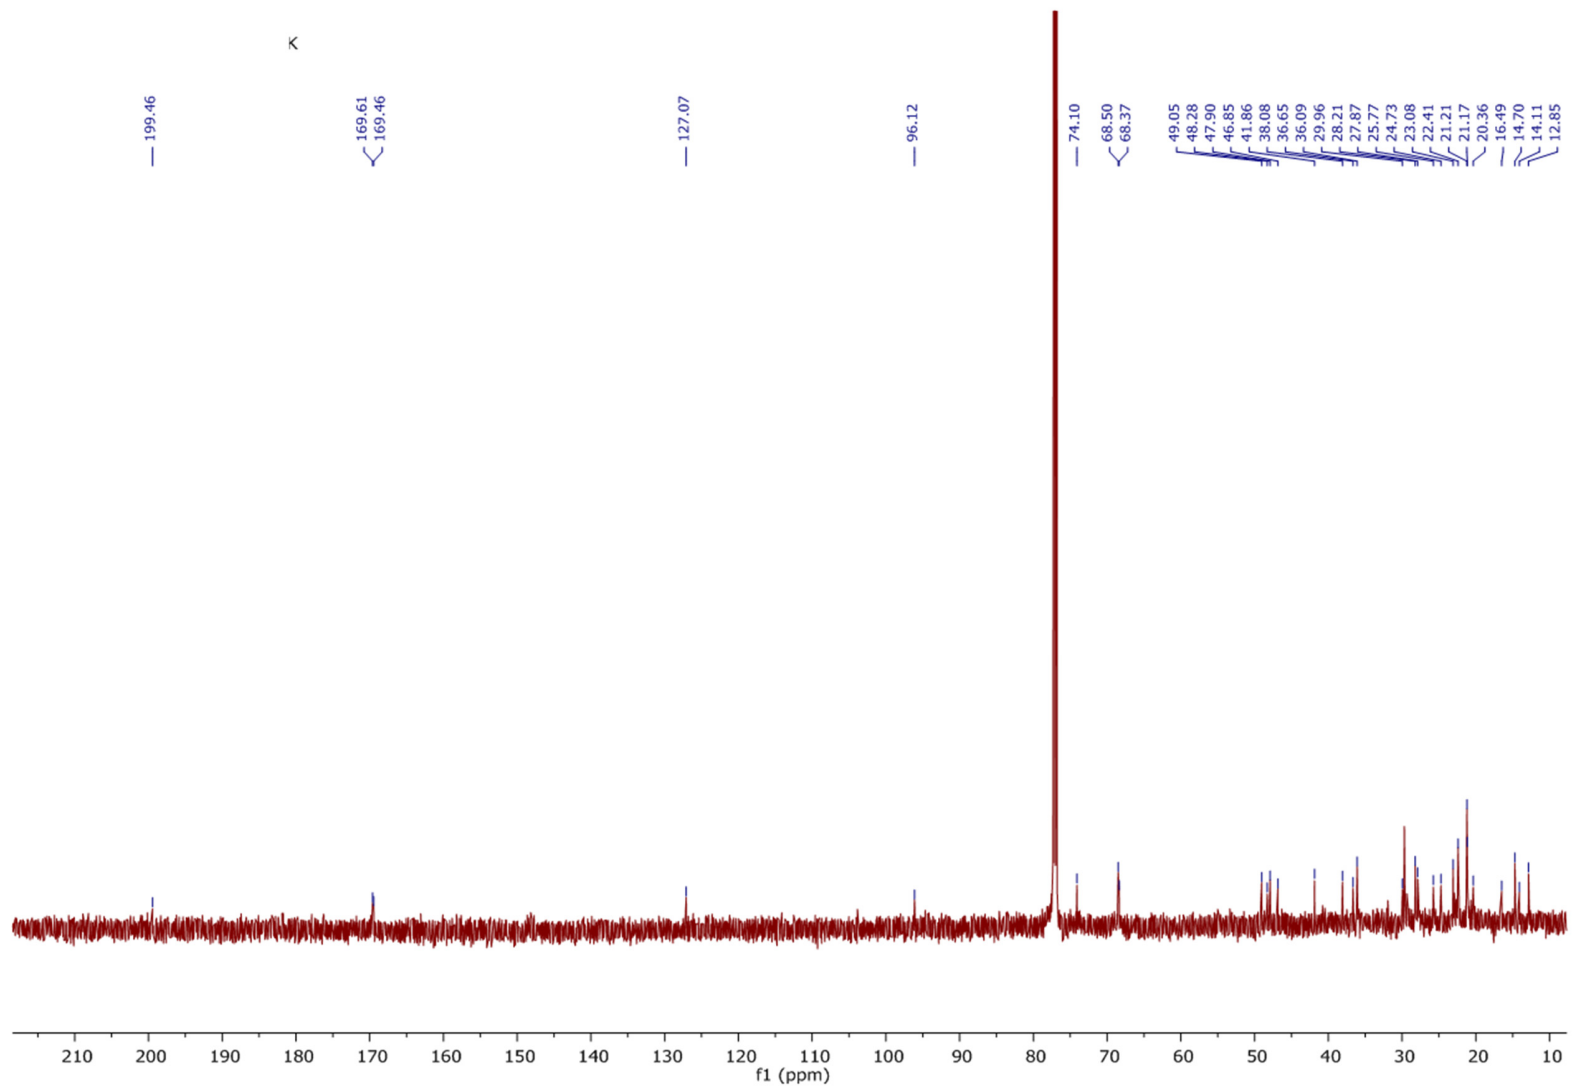

Figure S44. <sup>13</sup>C-NMR spectrum (150MHz, CDCl<sub>3</sub>, 303K) of compound 9



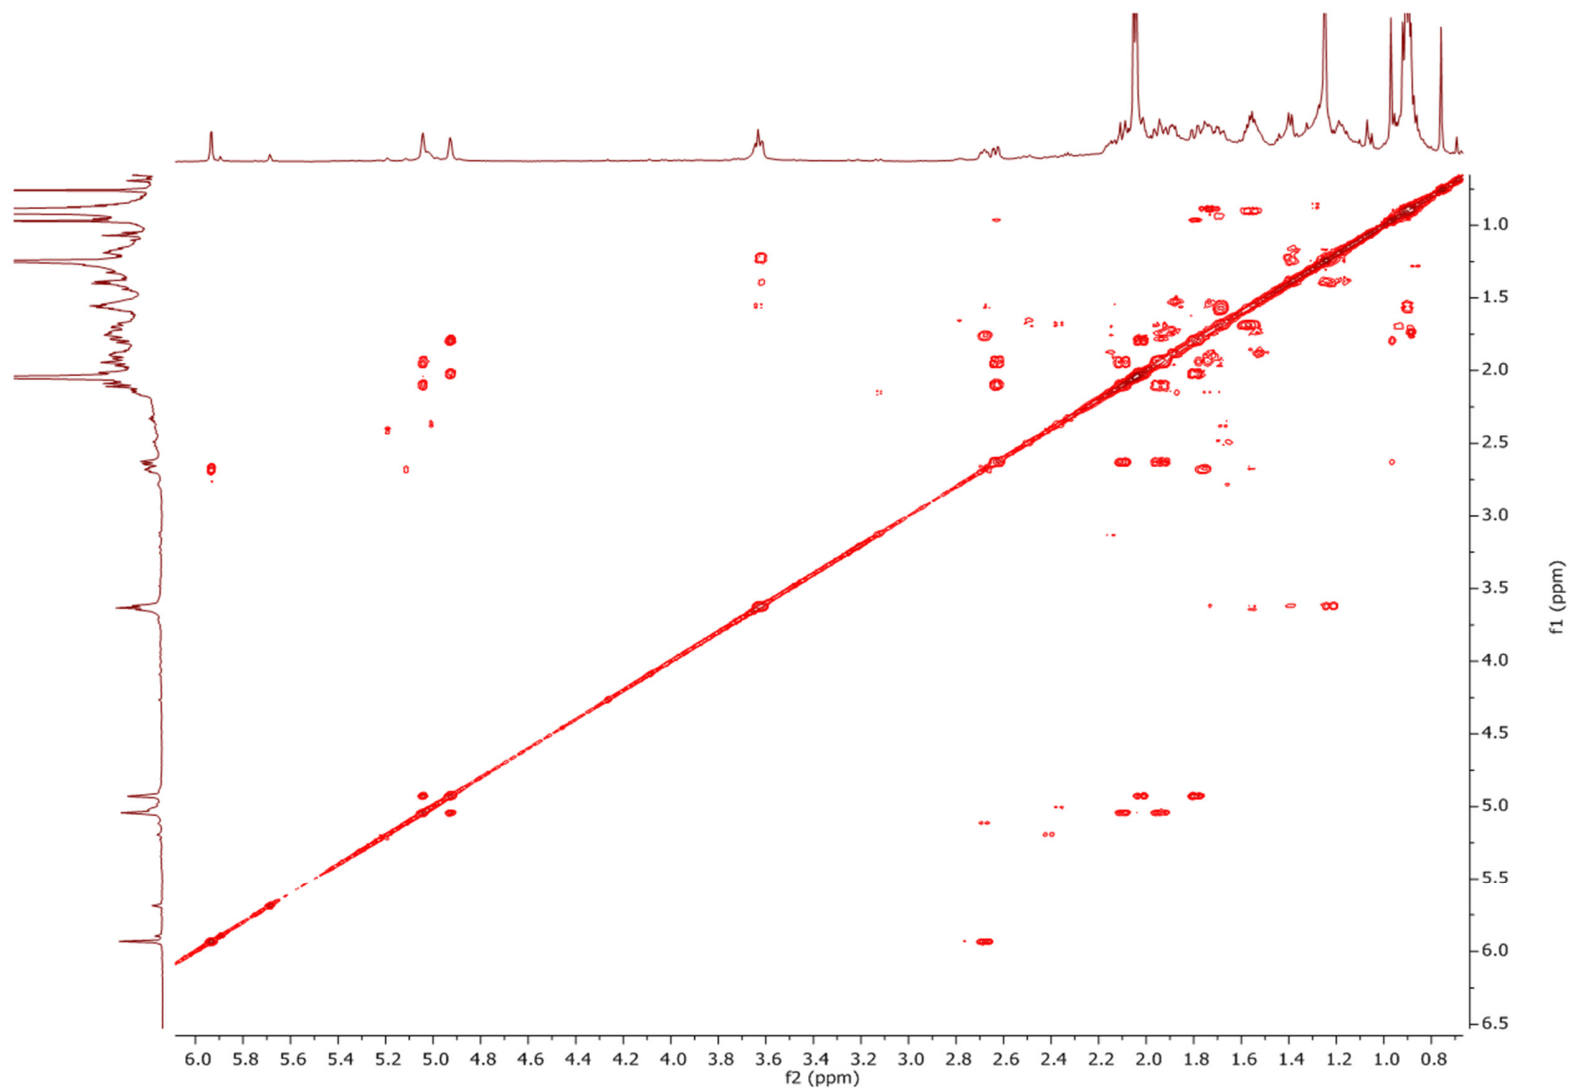

**Figure S45.**  $^1\text{H}$ - $^1\text{H}$  COSY NMR spectrum (600MHz,  $\text{CDCl}_3$ , 303K) of compound **9**

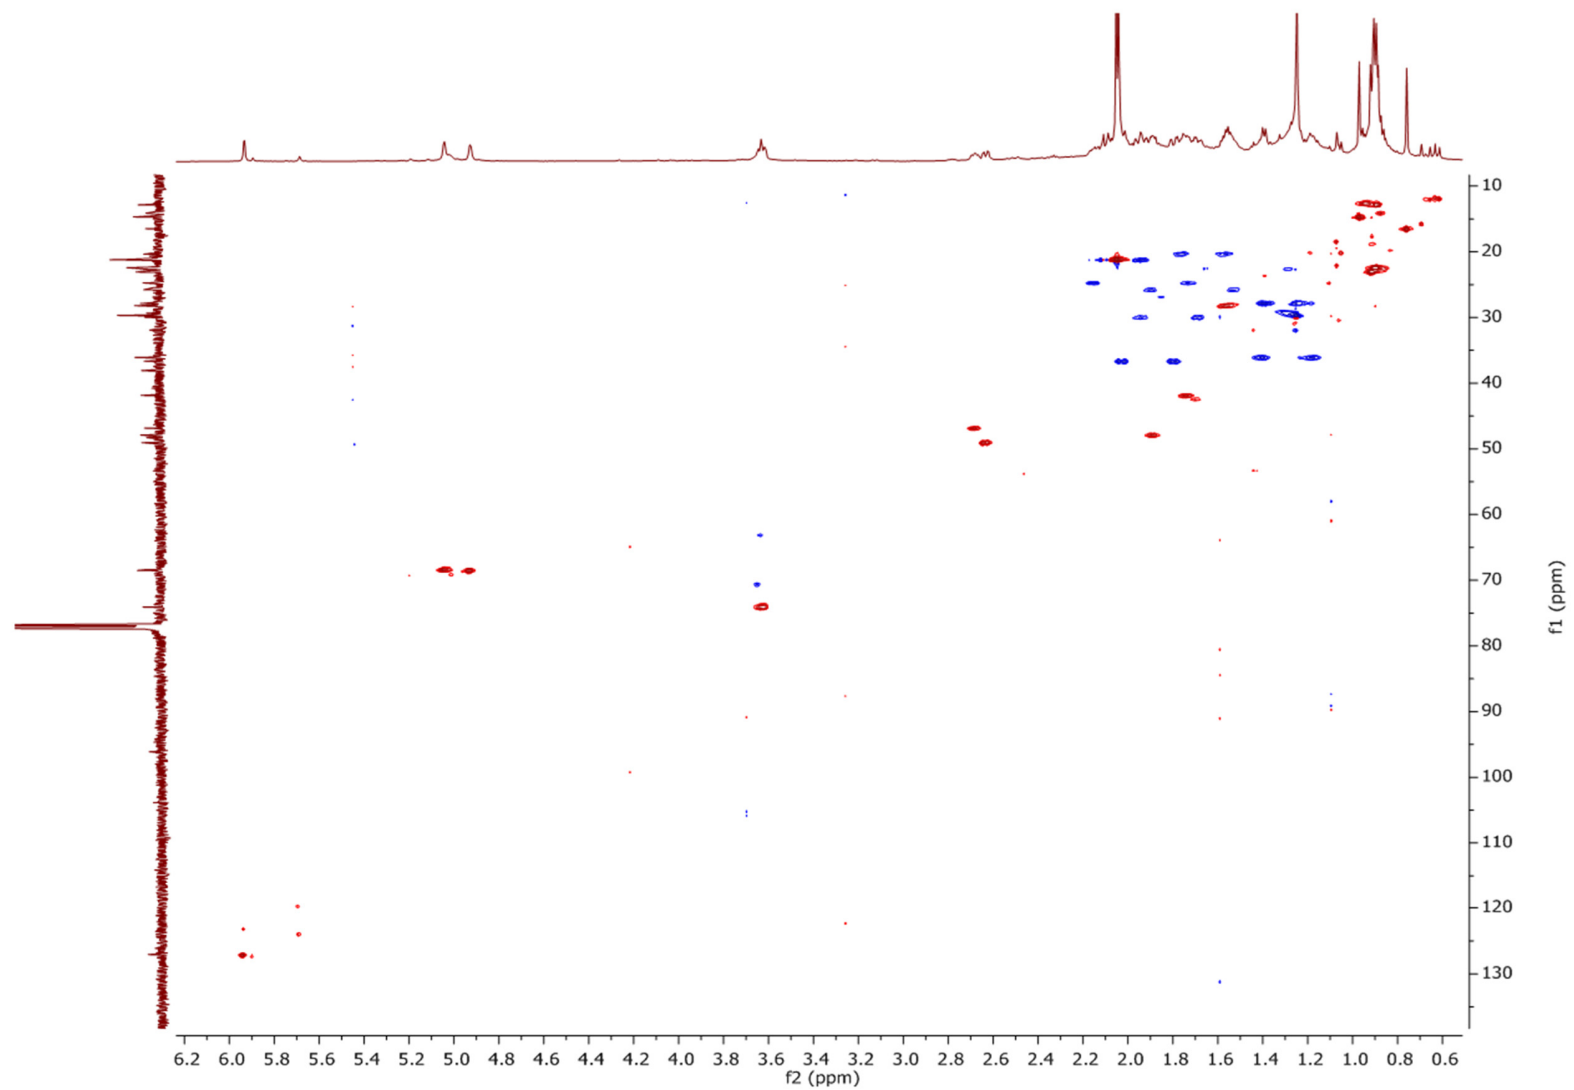

Figure S46. HSQC-DEPT NMR spectrum (600MHz, CDCl<sub>3</sub>, 303K) of compound 9

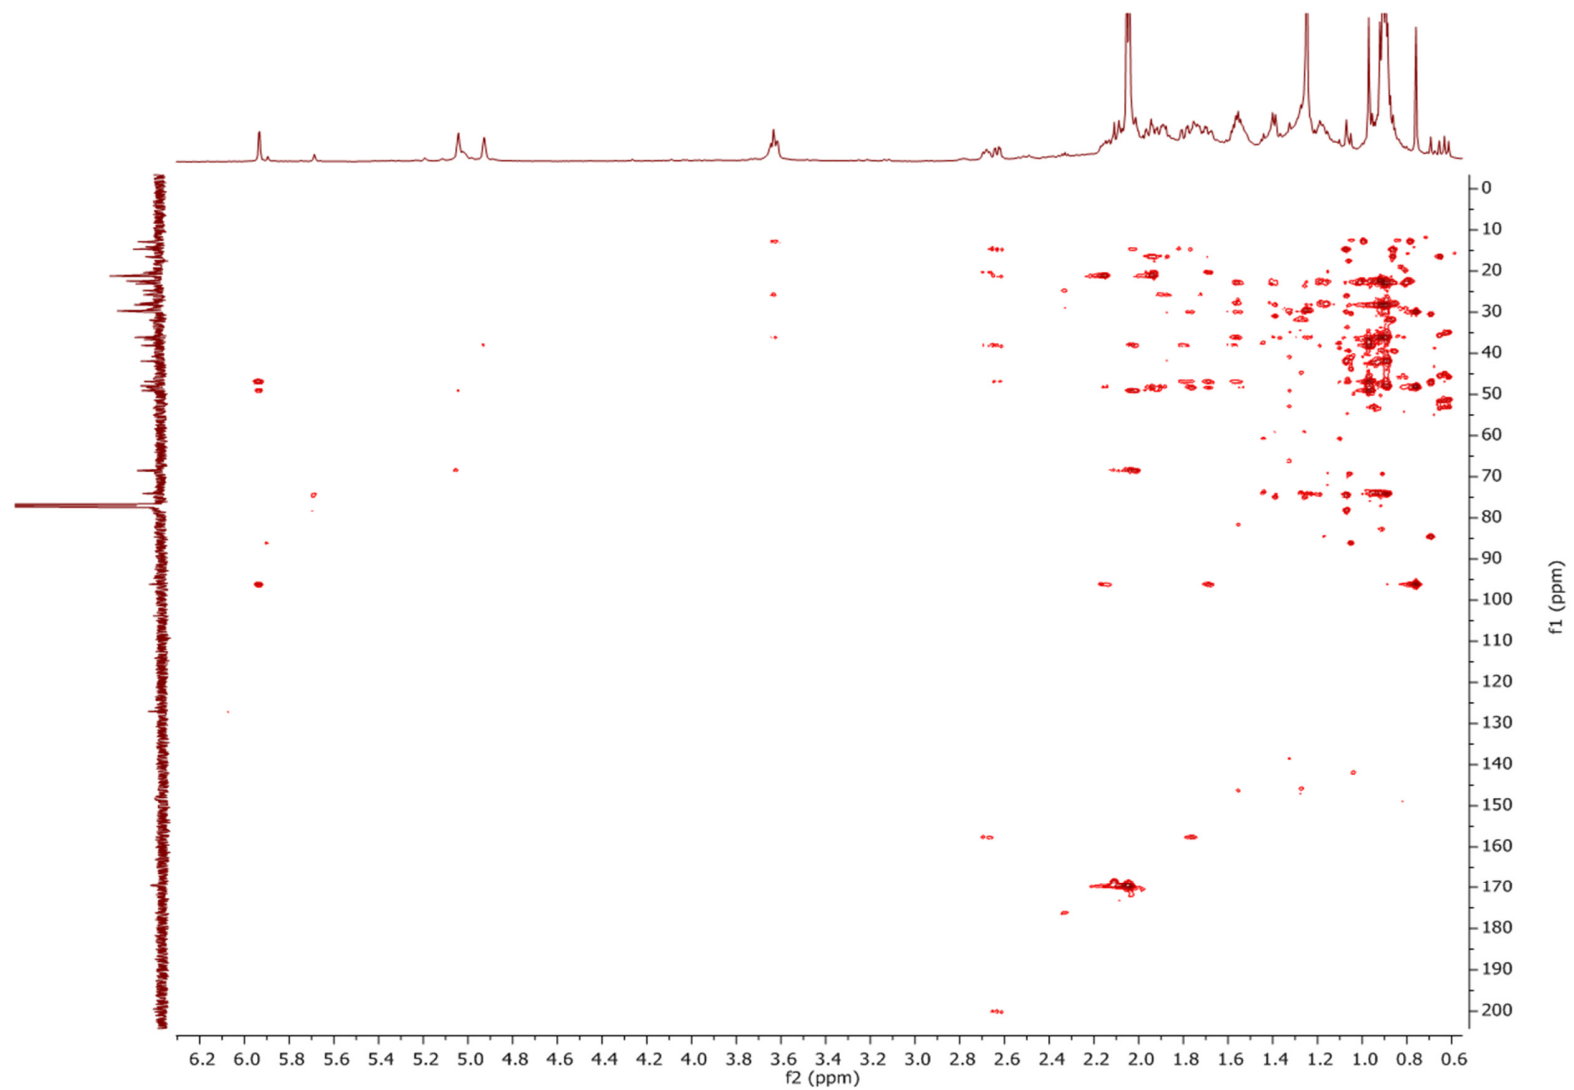

Figure S47. HMBC NMR spectrum (600MHz, CDCl<sub>3</sub>, 303K) of compound 9

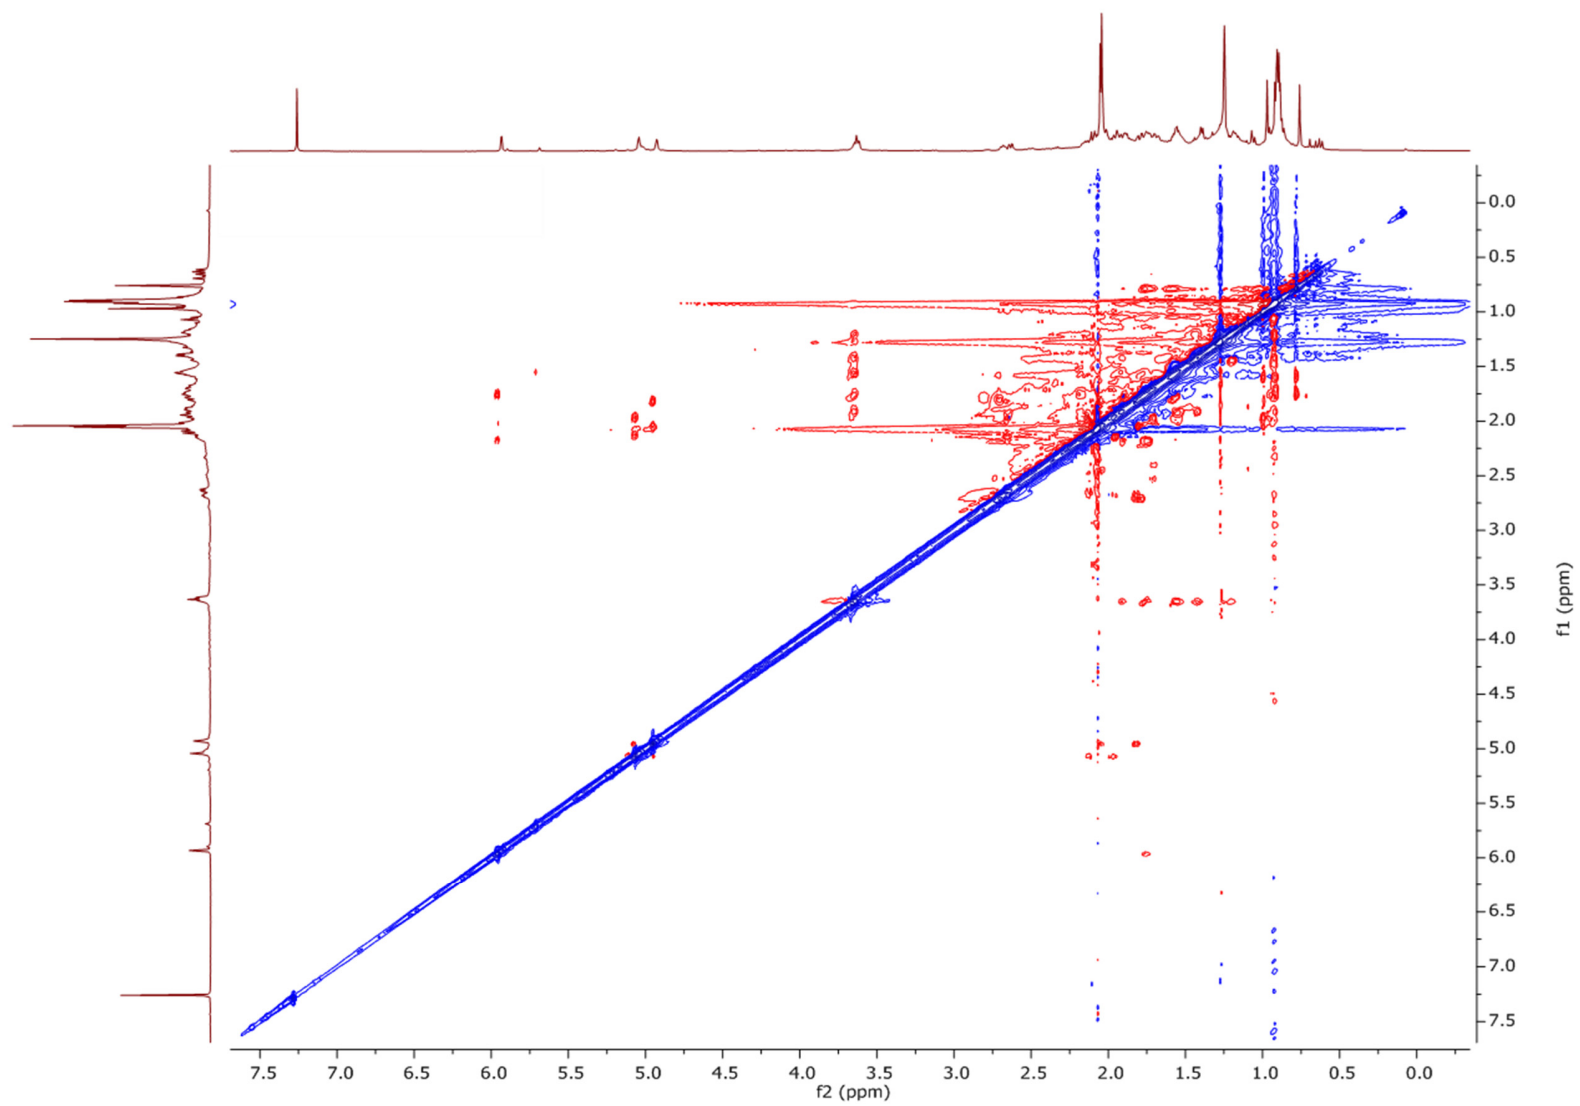

**Figure S48.** ROESY NMR spectrum (600MHz, CDCl<sub>3</sub>, 303K) of compound **9**

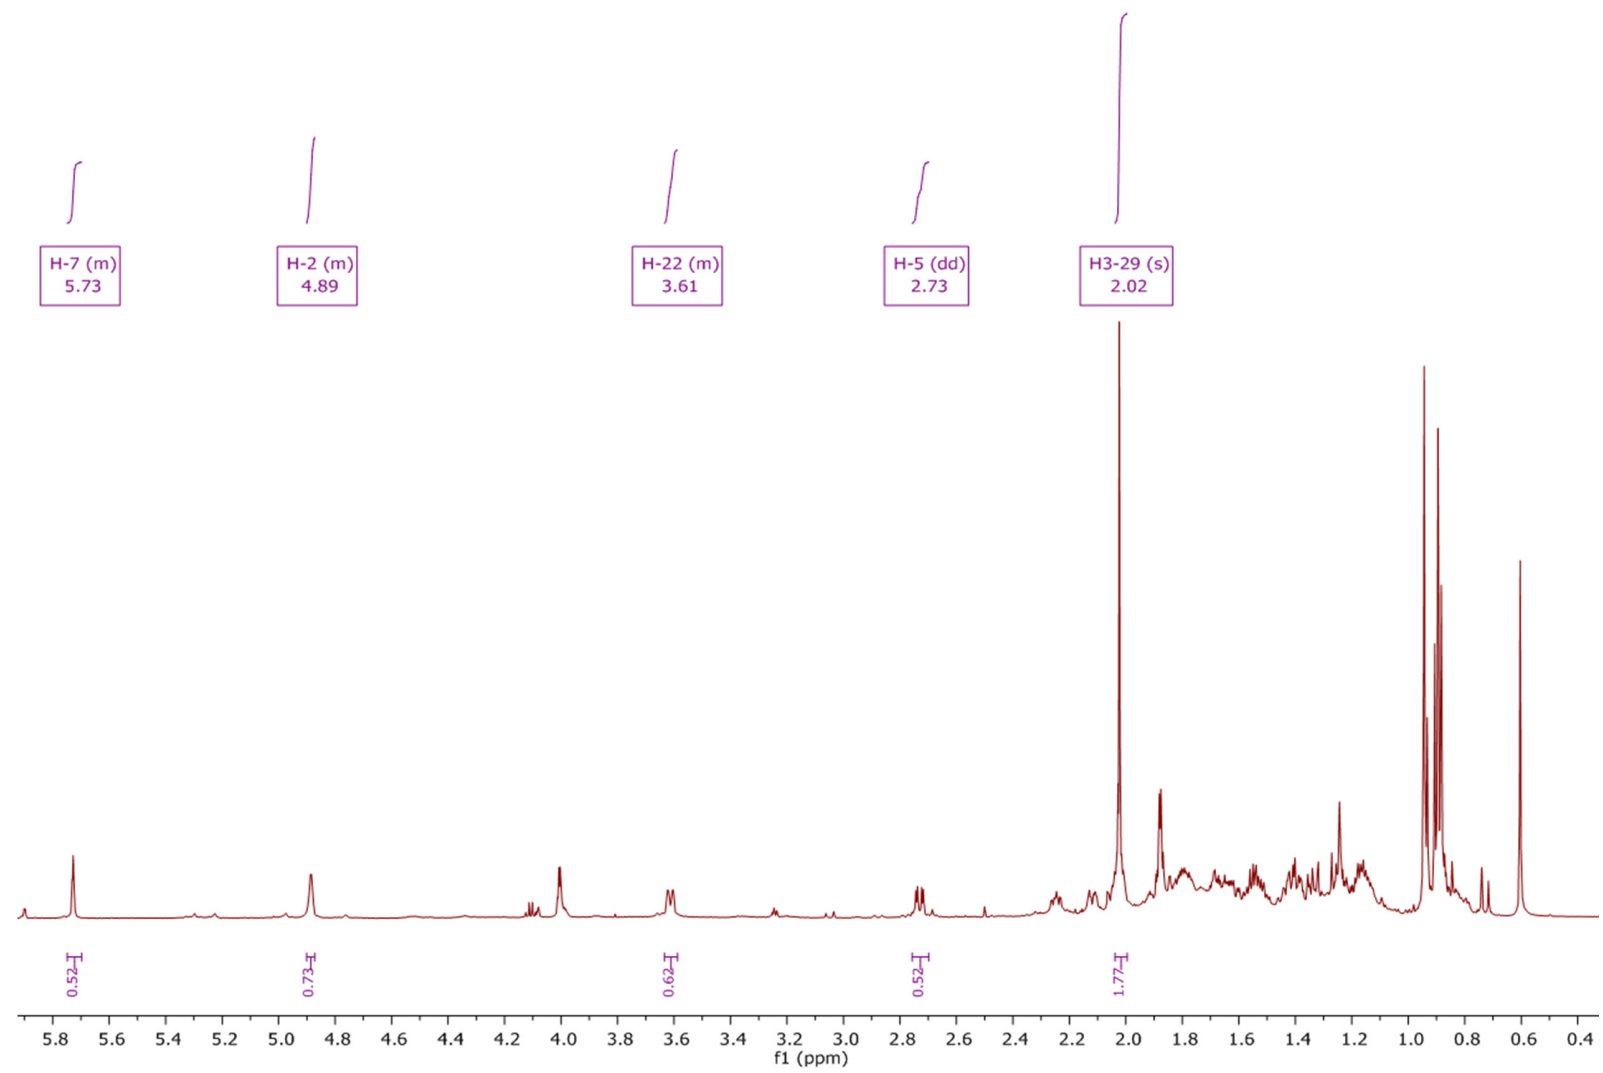

Figure S49. <sup>1</sup>H-NMR spectrum (600MHz, CDCl<sub>3</sub>, 303K) of compound 10

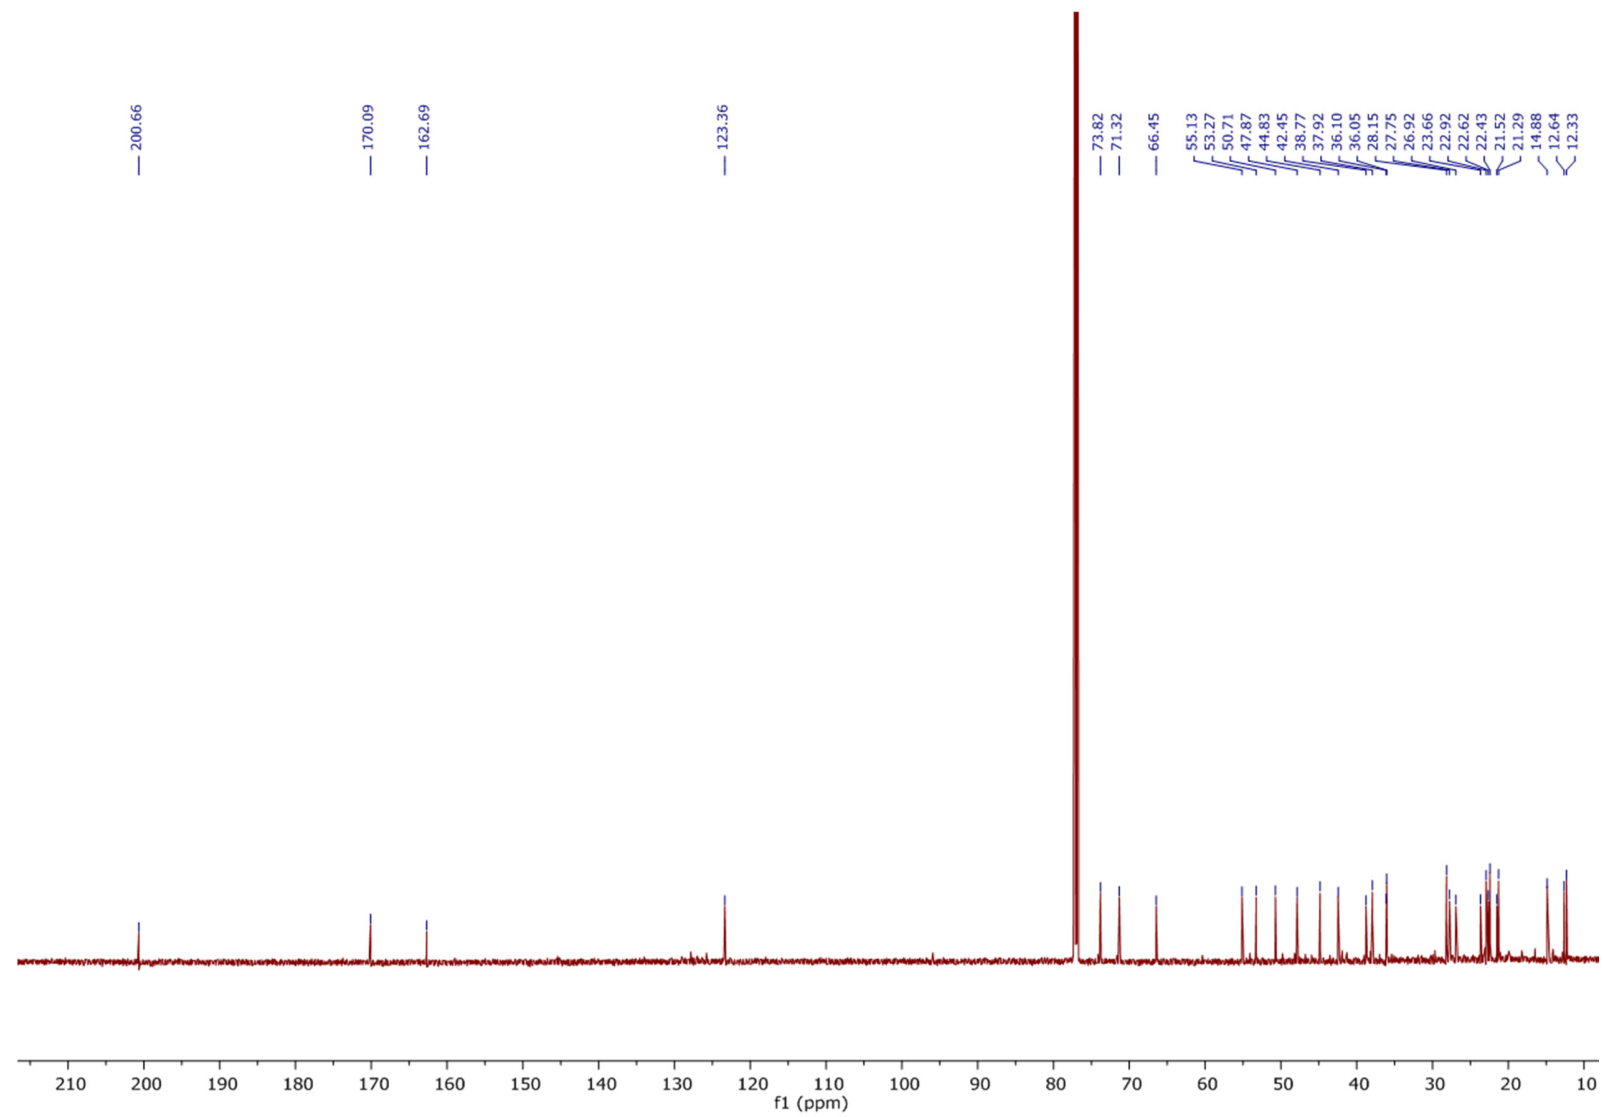

Figure S50.  $^{13}\text{C}$ -NMR spectrum (150MHz,  $\text{CDCl}_3$ , 303K) of compound 10

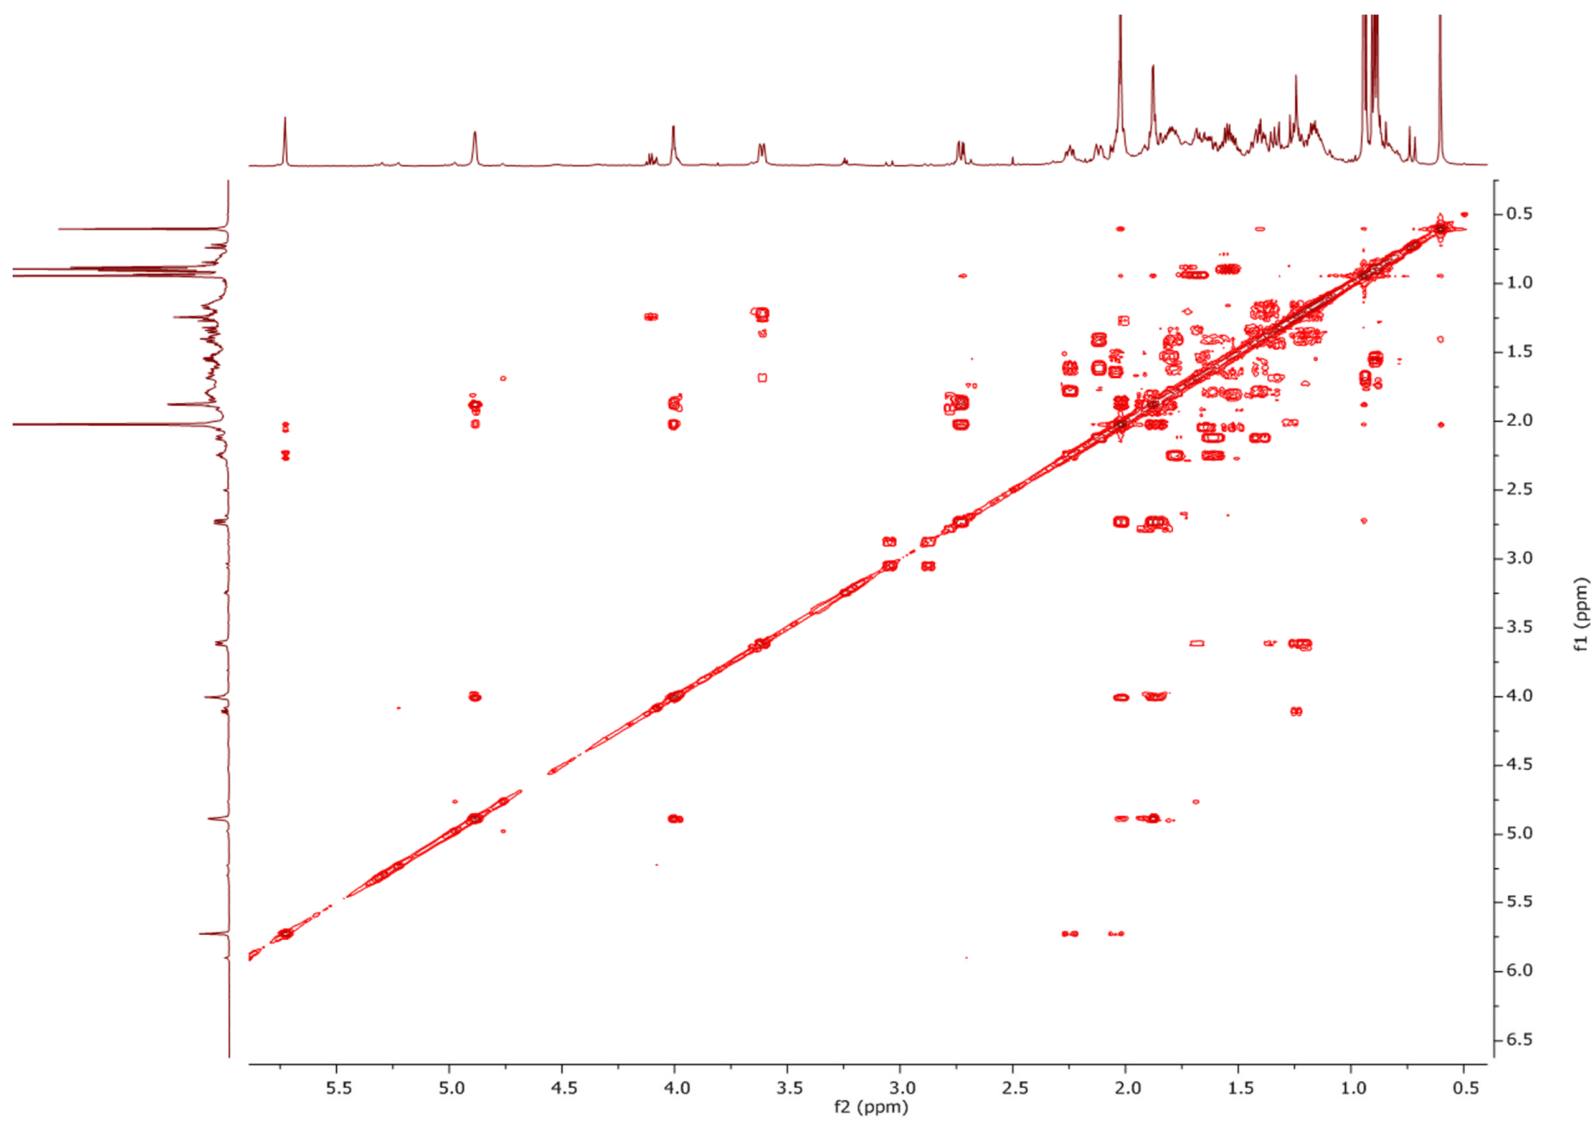

**Figure S51.**  $^1\text{H}$ - $^1\text{H}$  COSY NMR spectrum (600MHz,  $\text{CDCl}_3$ , 303K) of compound **10**

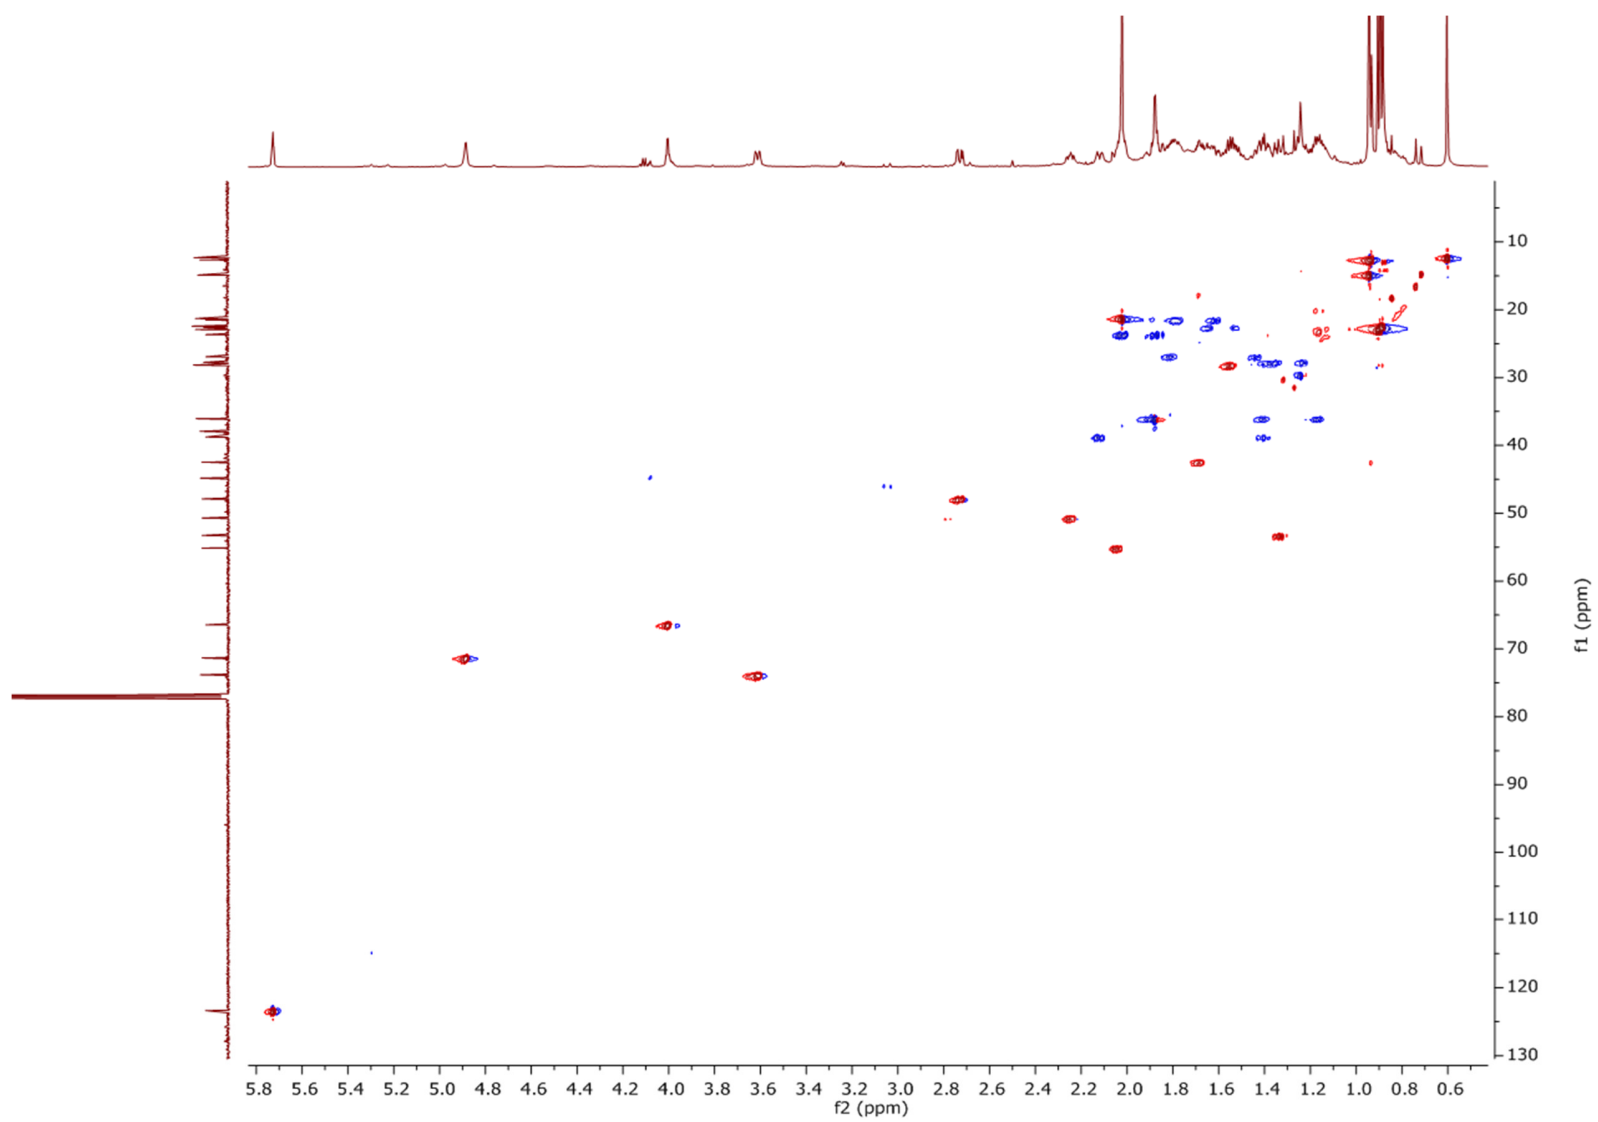

Figure S52. HSQC-DEPT NMR spectrum (600MHz, CDCl<sub>3</sub>, 303K) of compound 10



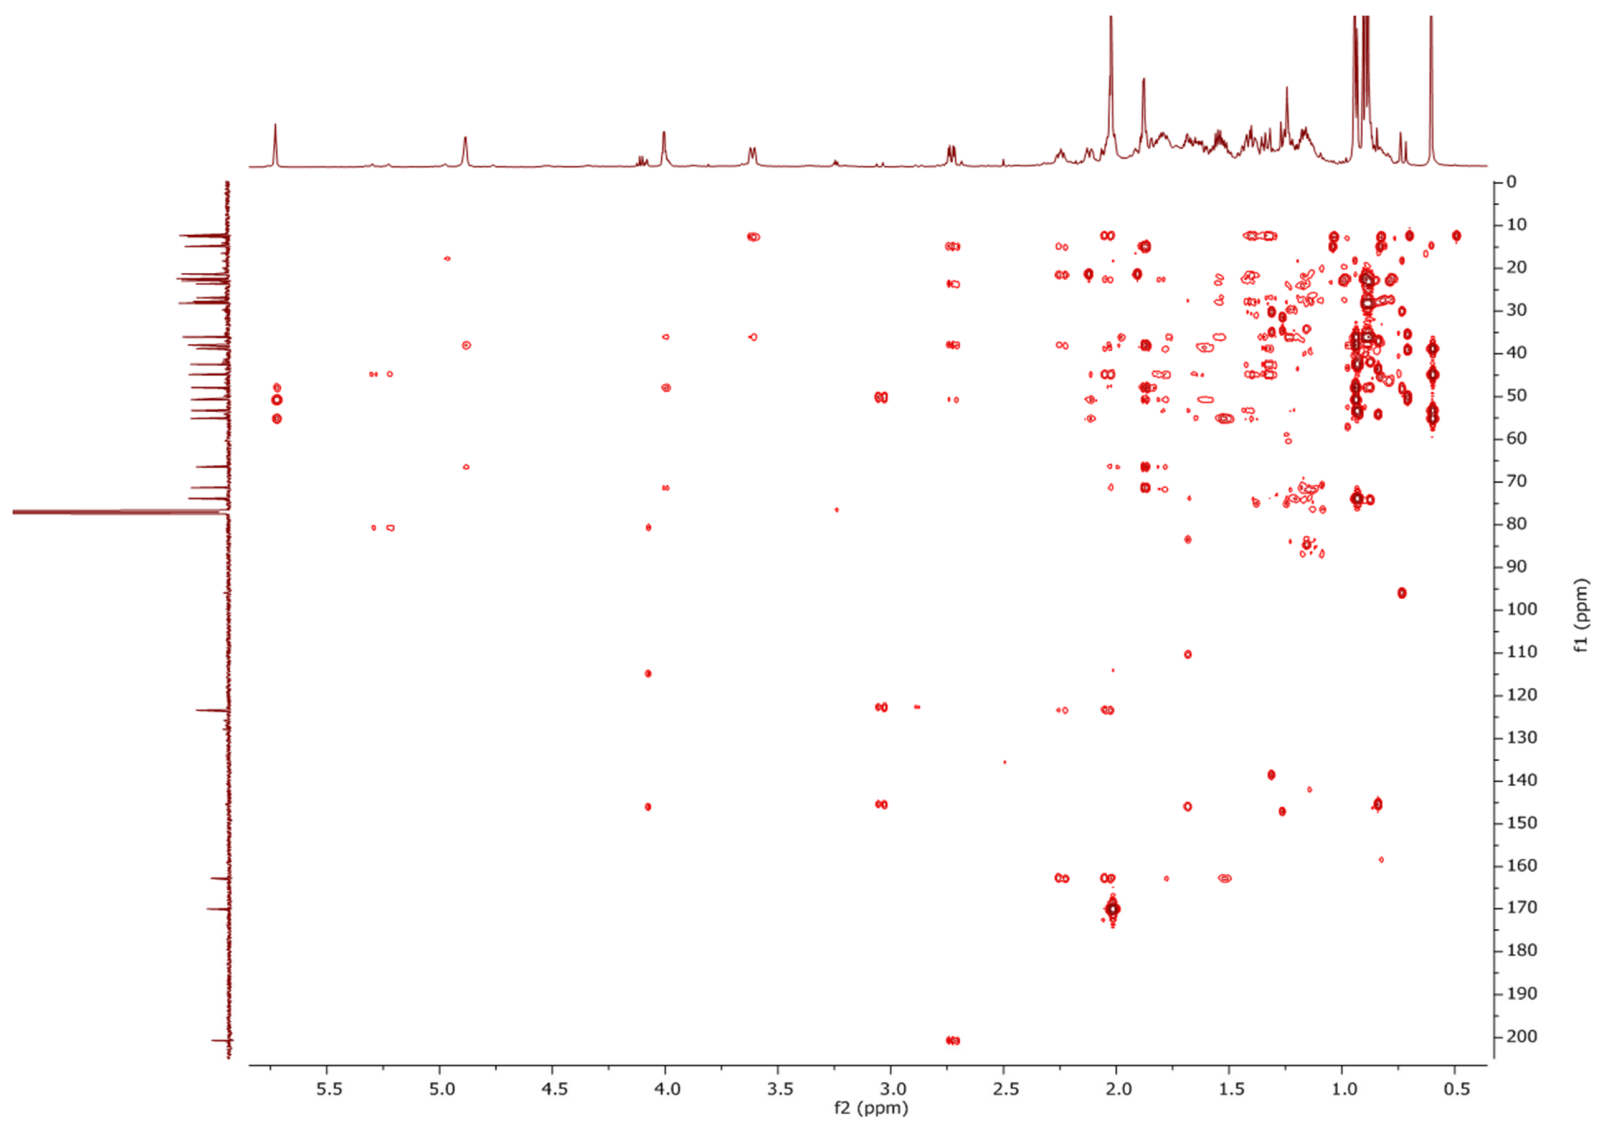

Figure S53. HMBC NMR spectrum (600MHz, CDCl<sub>3</sub>, 303K) of compound 10

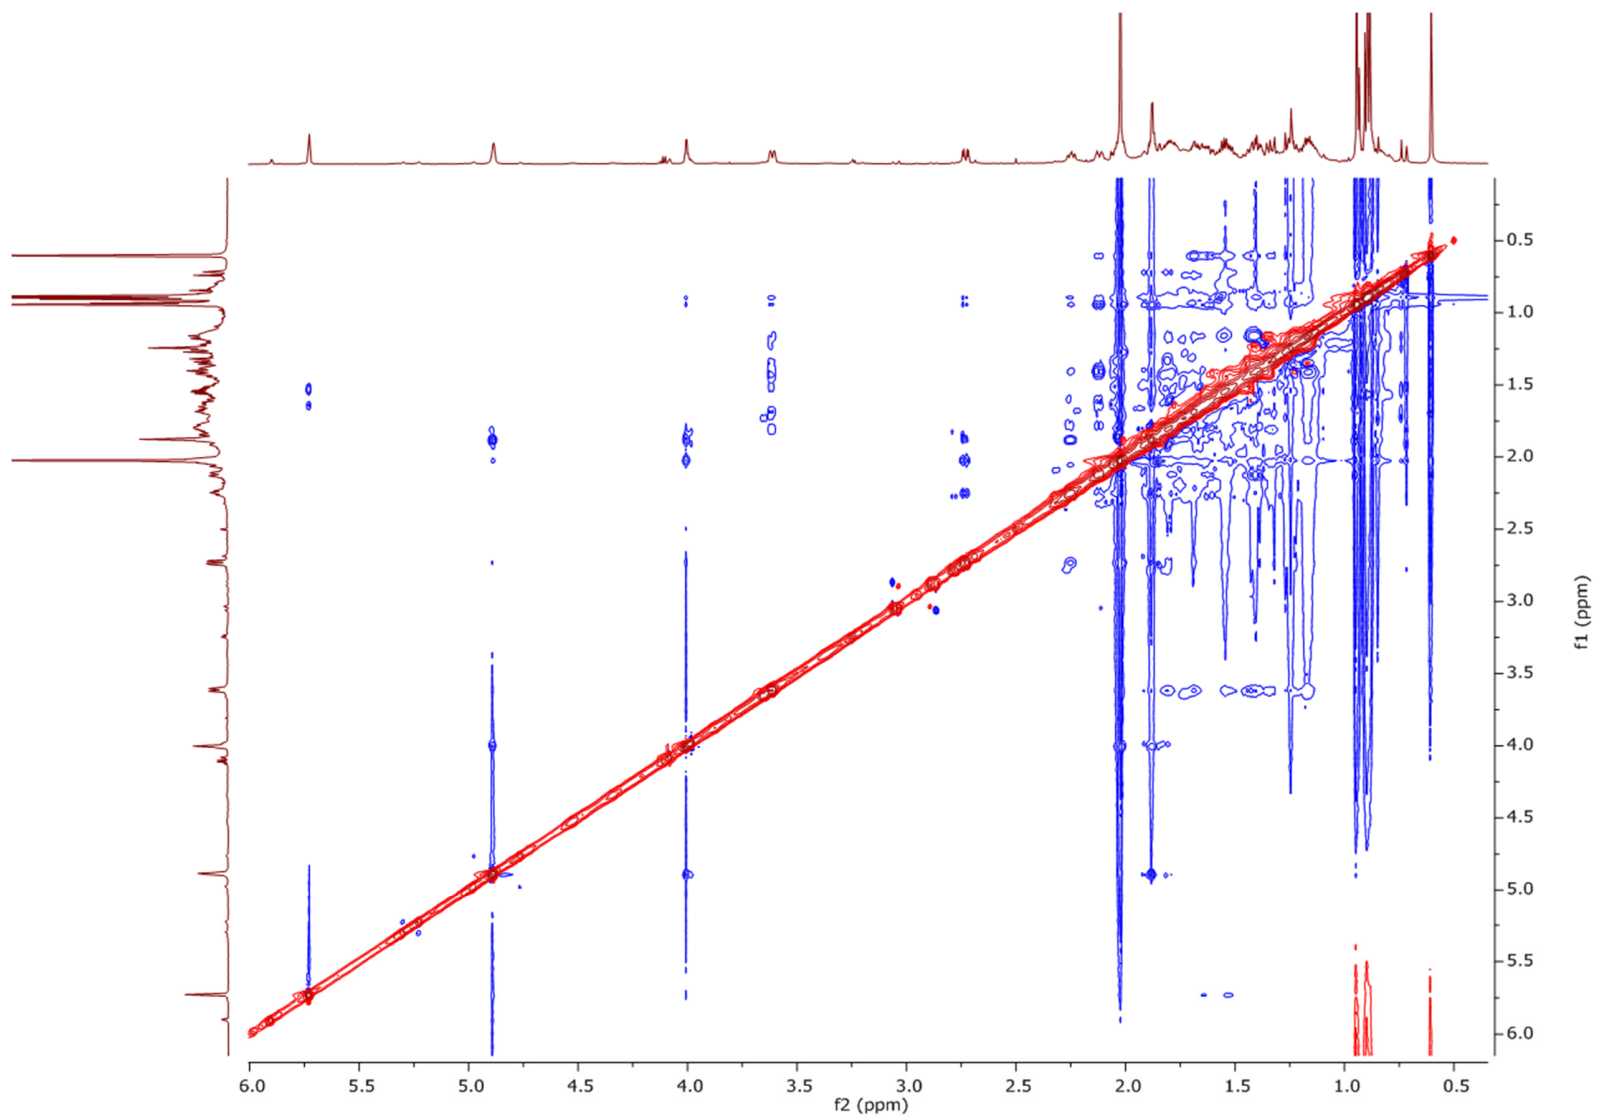

Figure S54. ROESY NMR spectrum (600MHz, CDCl<sub>3</sub>, 303K) of compound 10

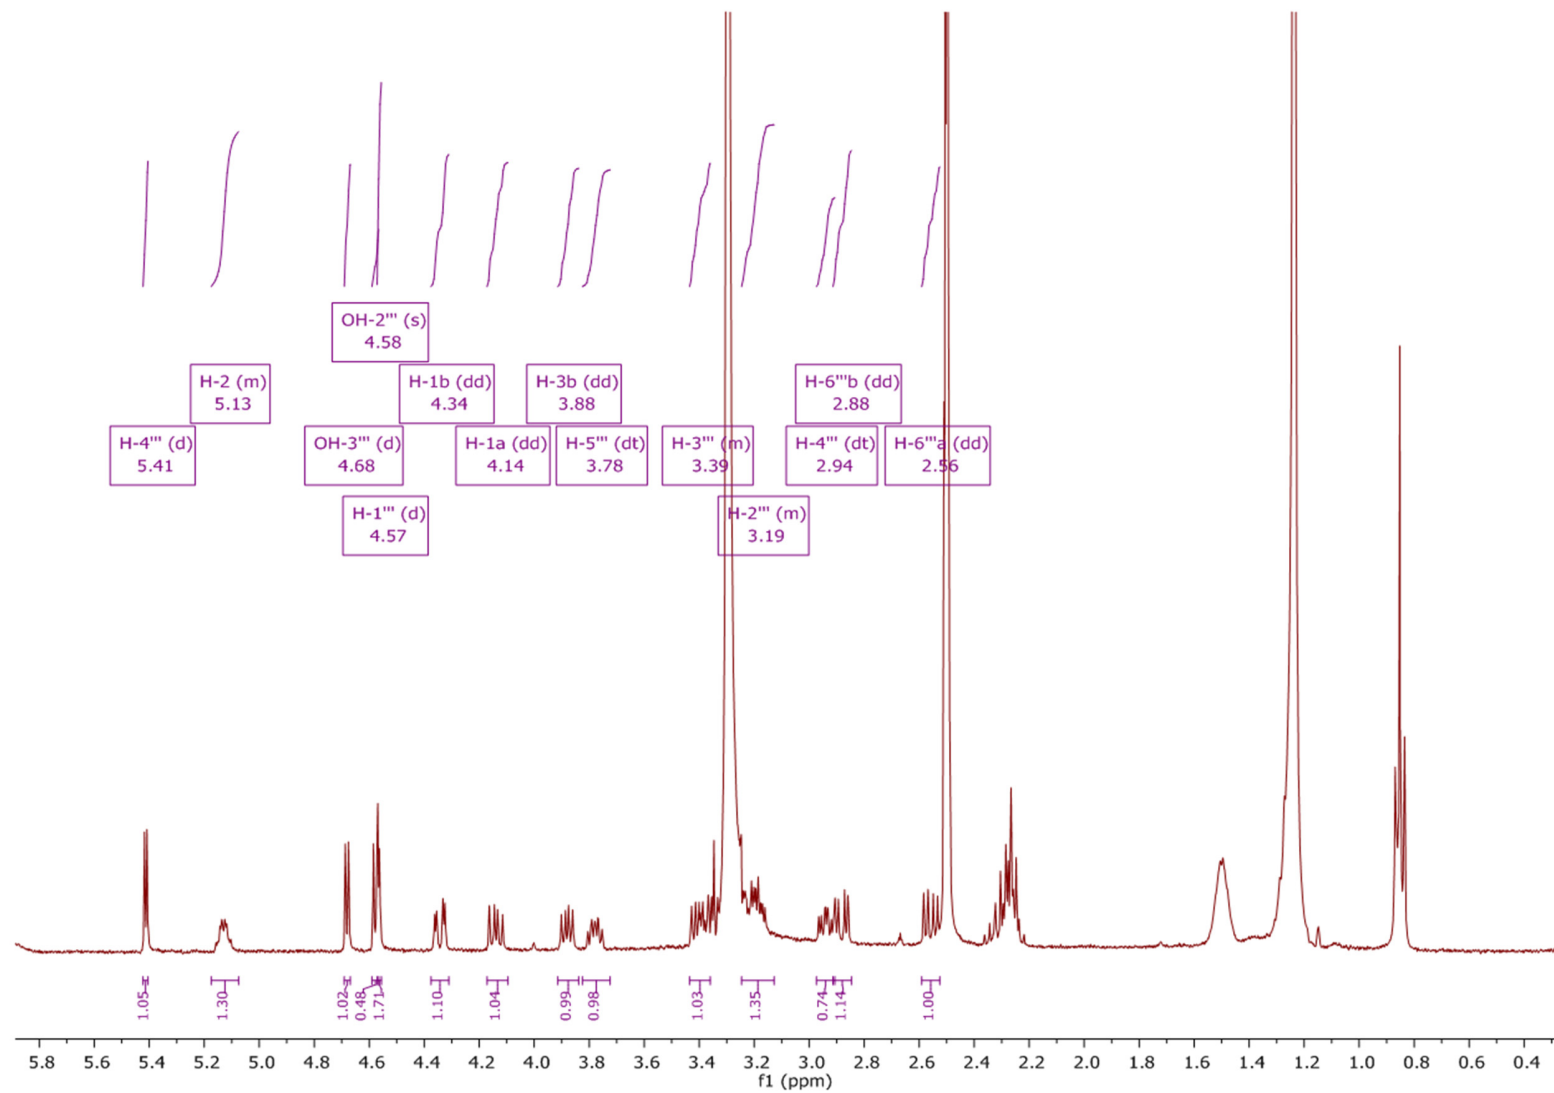

Figure S55. <sup>1</sup>H-NMR spectrum (600MHz, DMSO-d<sub>6</sub>, 303K) of compound 11

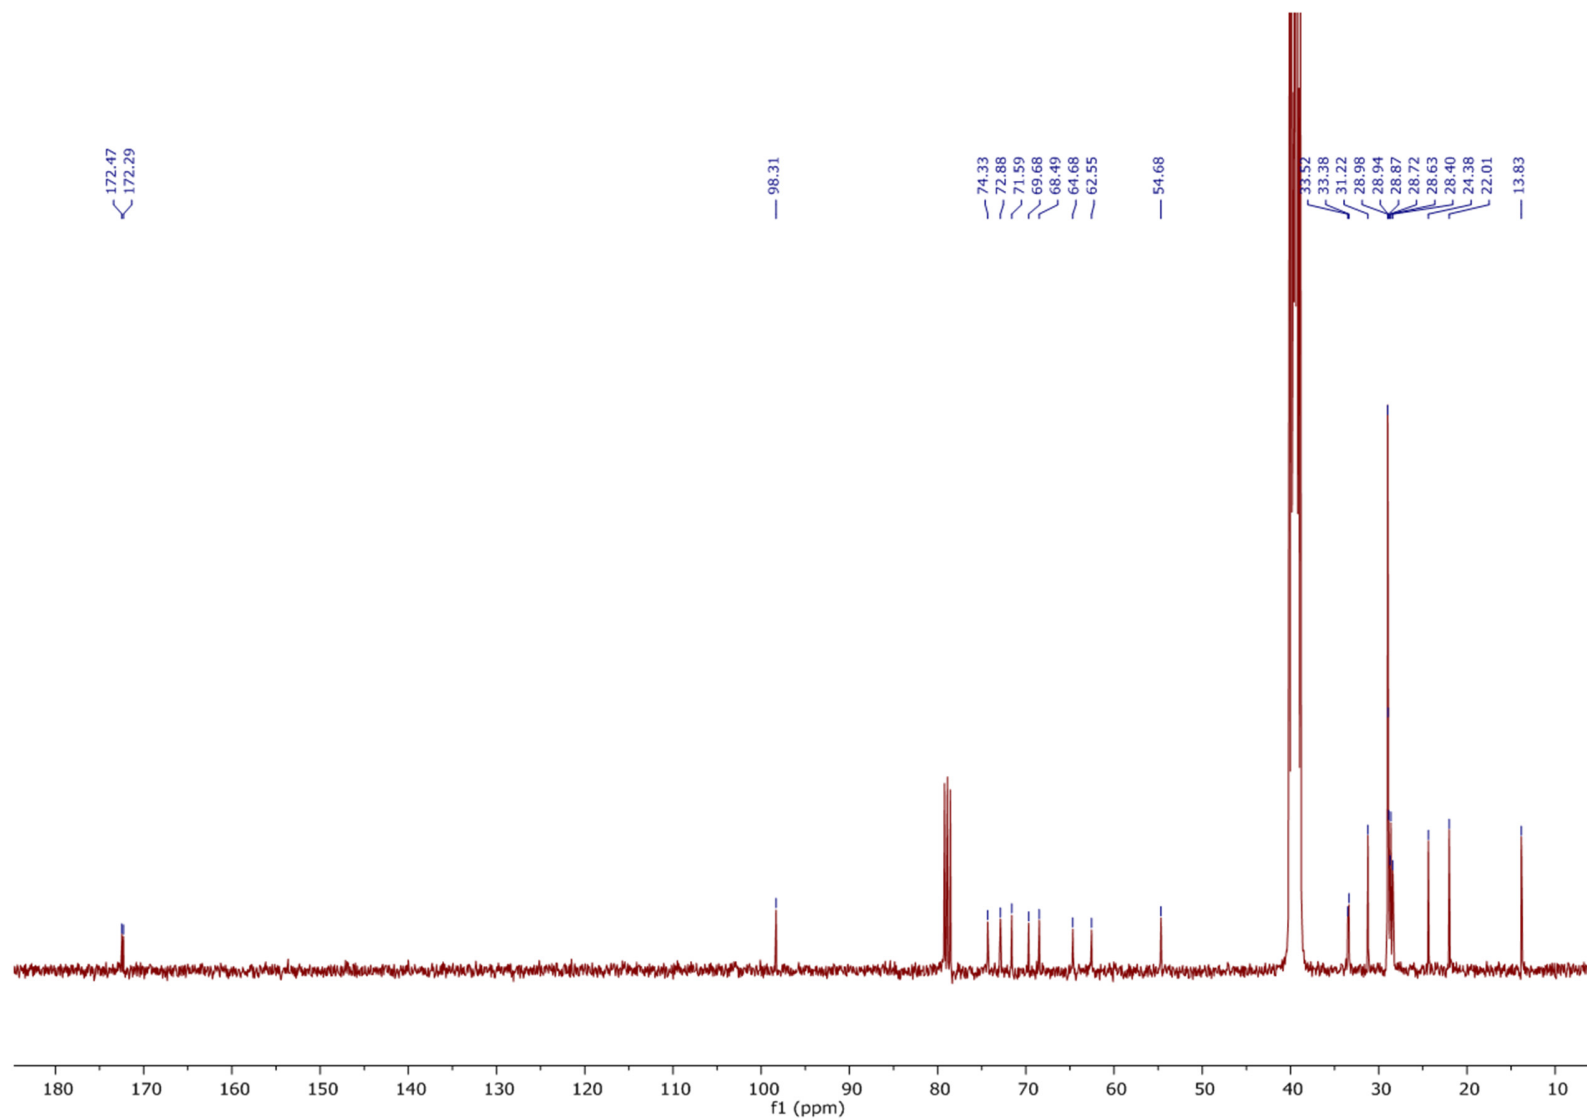

Figure S56.  $^{13}\text{C}$ -NMR spectrum (150MHz, DMSO- $d_6$ , 303K) of compound 11

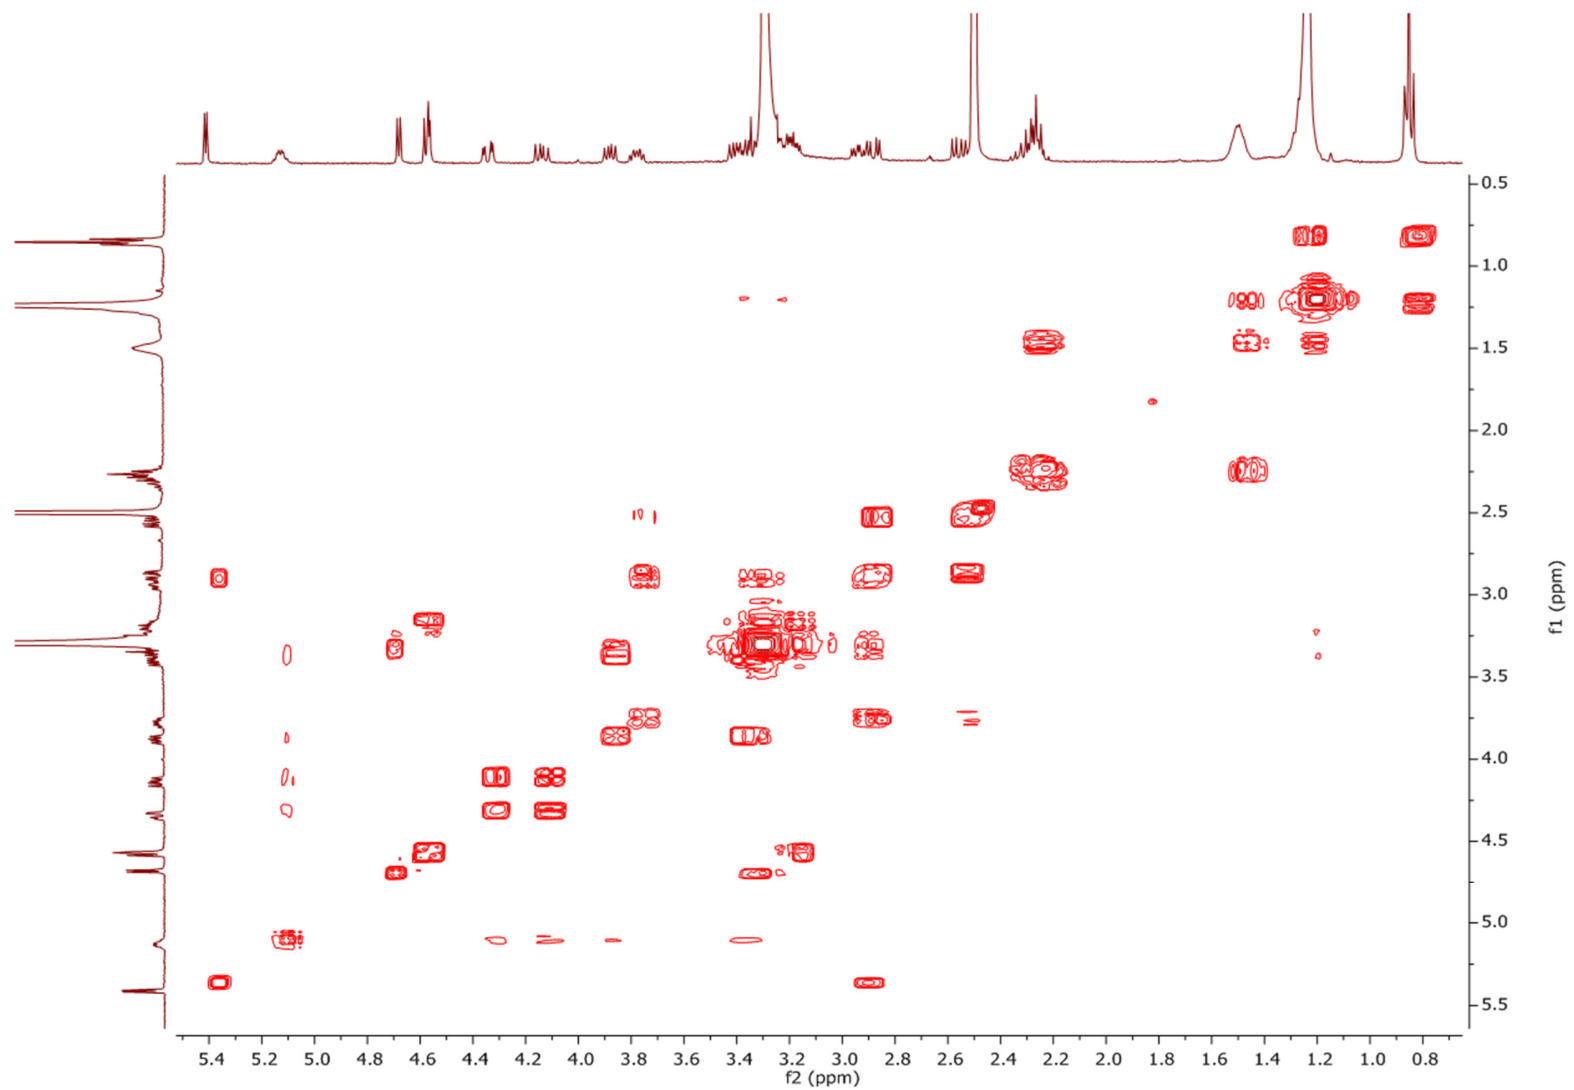

**Figure S57.**  $^1\text{H}$ - $^1\text{H}$  COSY NMR spectrum (600MHz, DMSO- $d_6$ , 303K) of compound 11

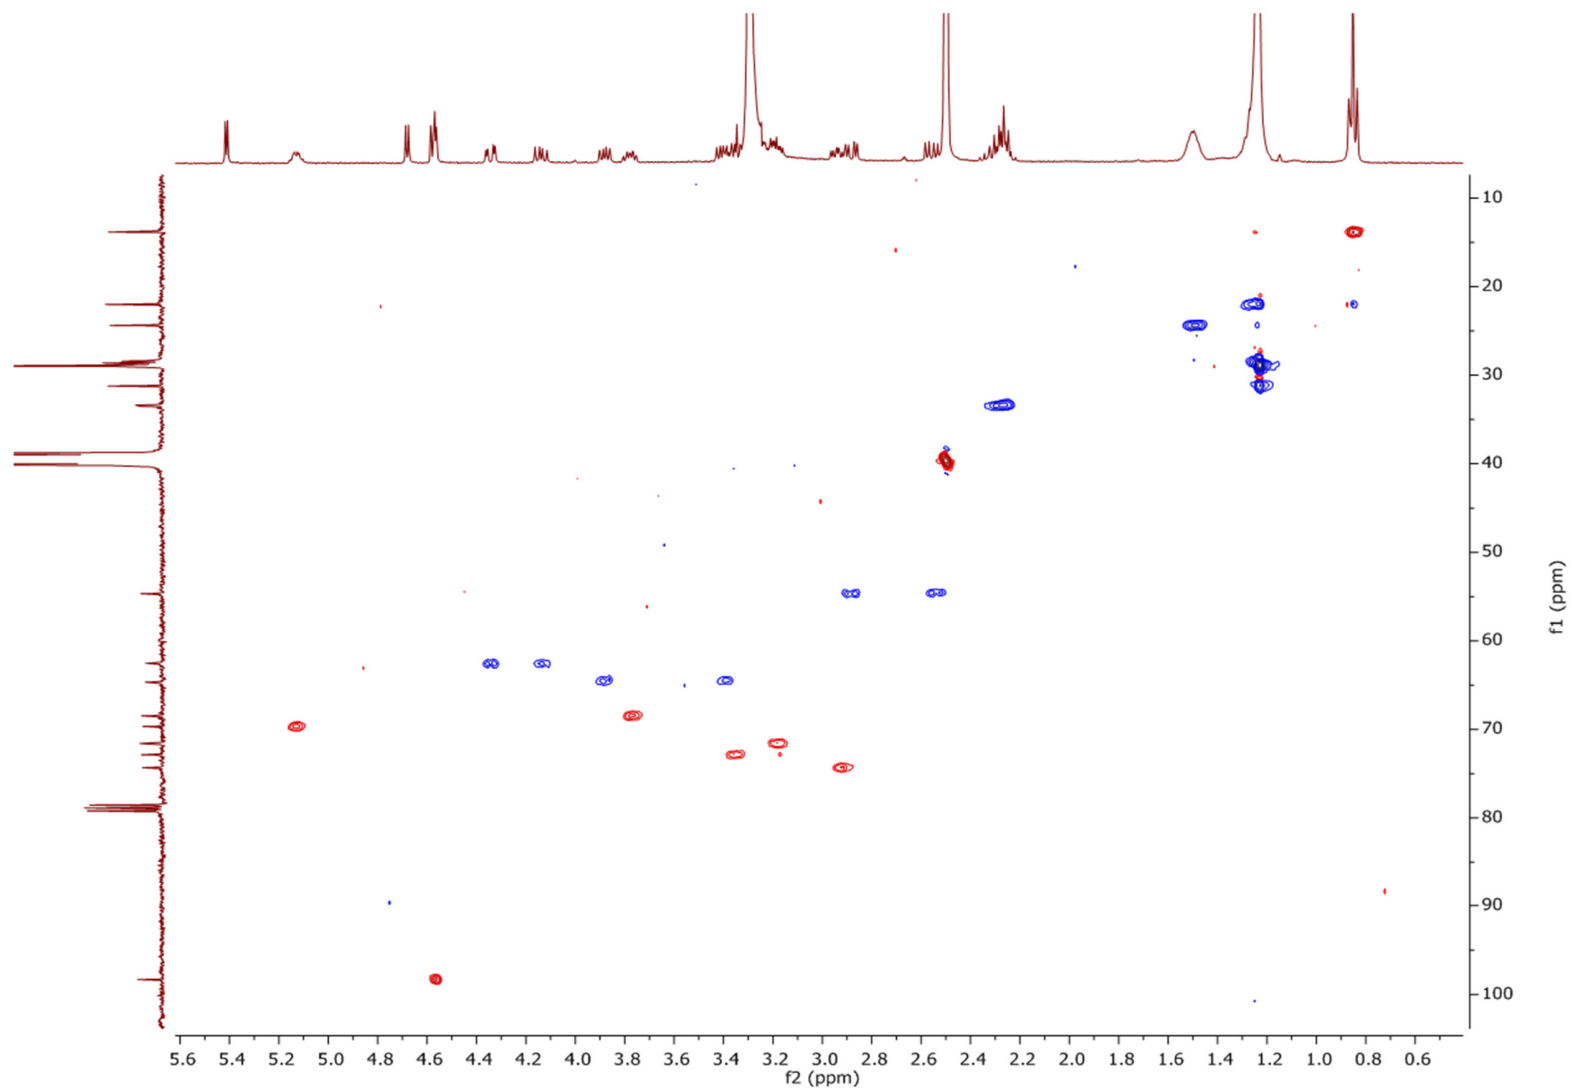

**Figure S58.** HSQC-DEPT NMR spectrum (600MHz, DMSO-d<sub>6</sub>, 303K) of compound **11**

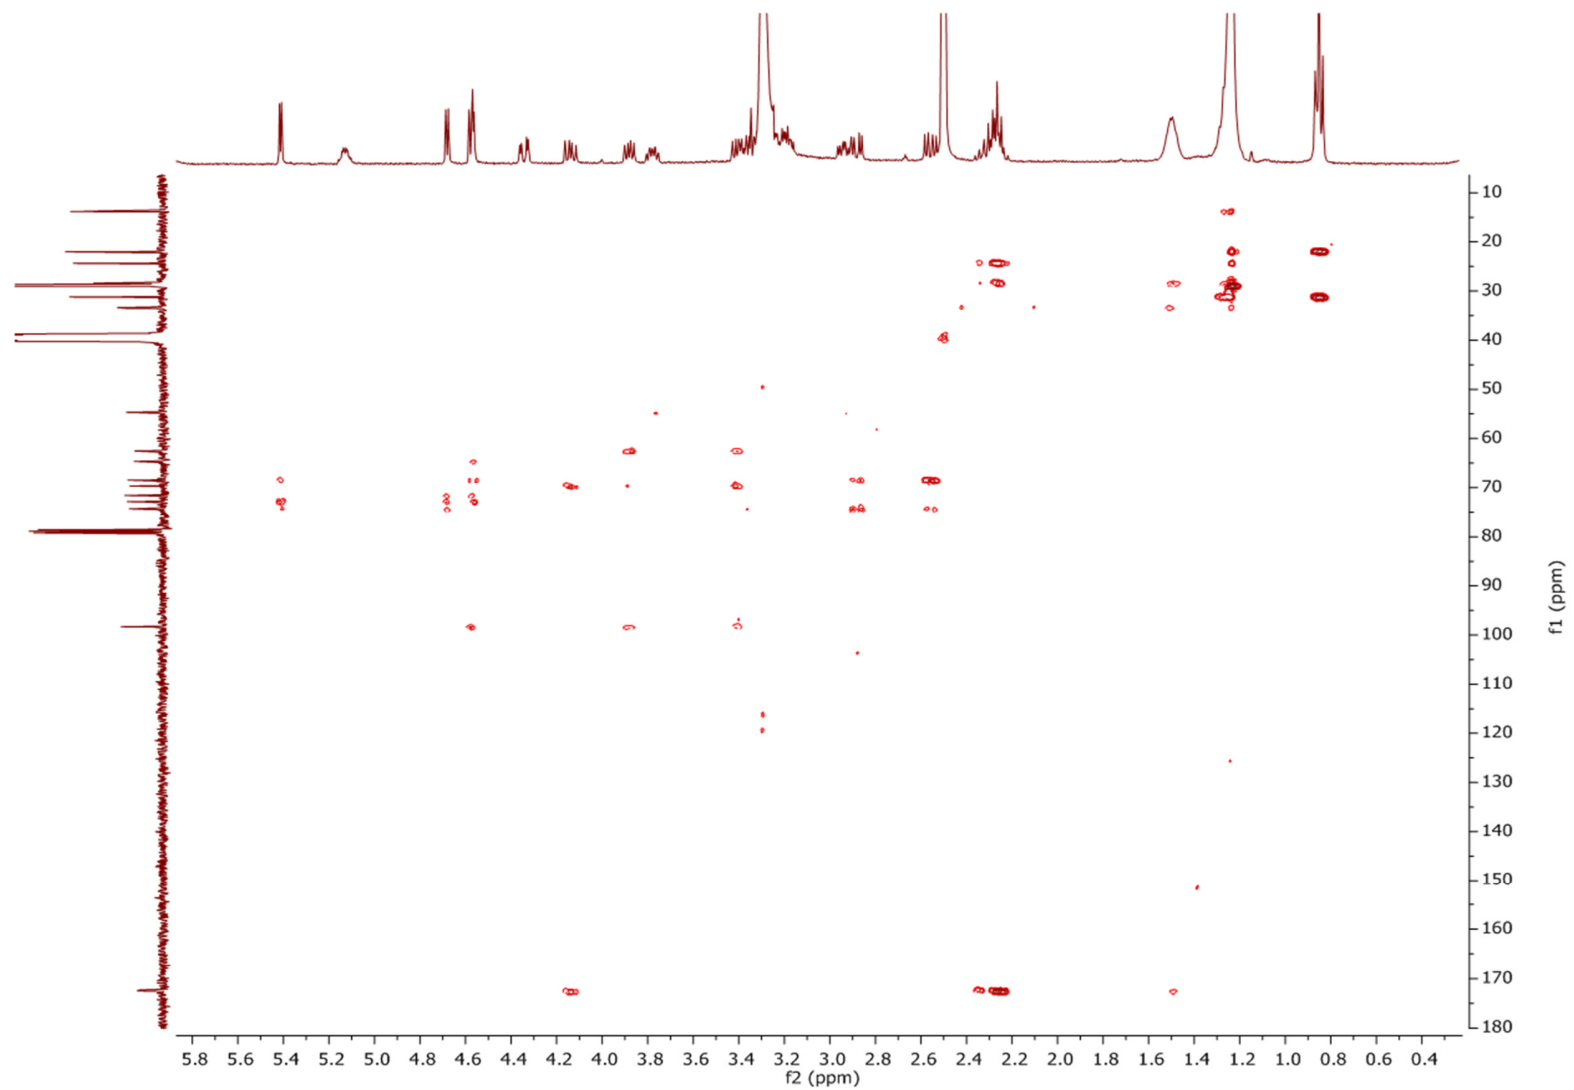

Figure S59. HMBC NMR spectrum (600MHz, DMSO-d<sub>6</sub>, 303K) of compound **11**

1: TOF MS ES+  
2.51e4

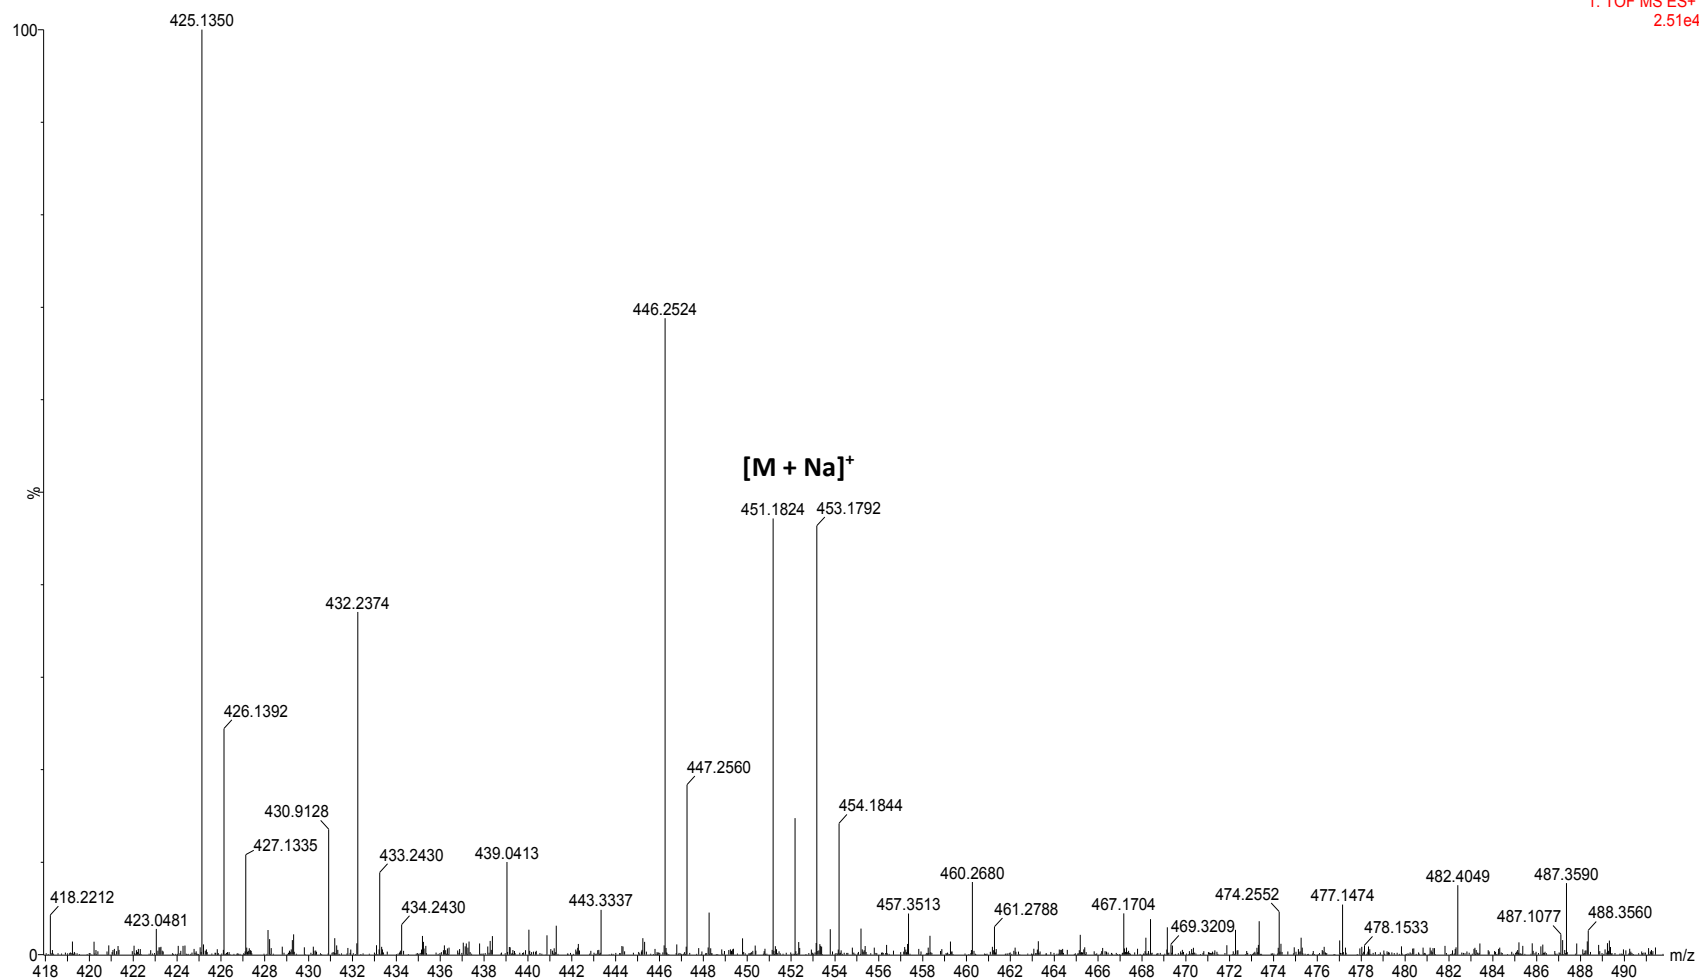

Figure S60. HR-ESI-MS spectrum of compound 1



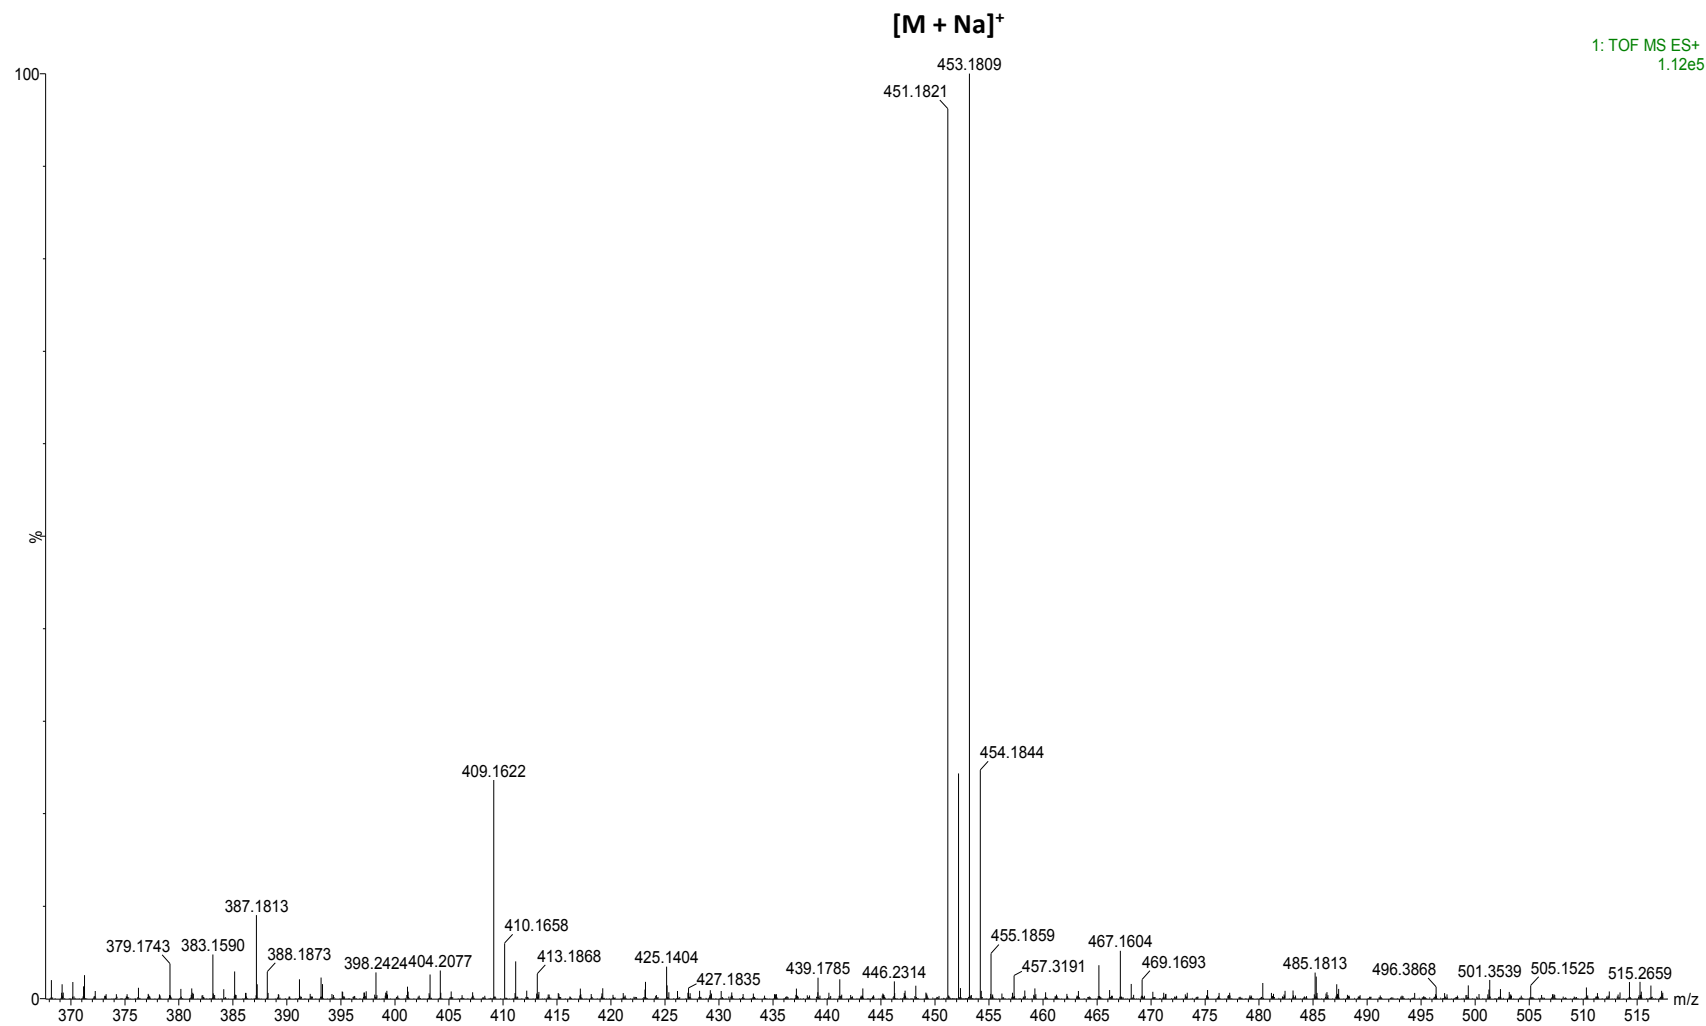

Figure S61. HR-ESI-MS spectrum of compound 2

1: TOF MS ES+  
1.12e5

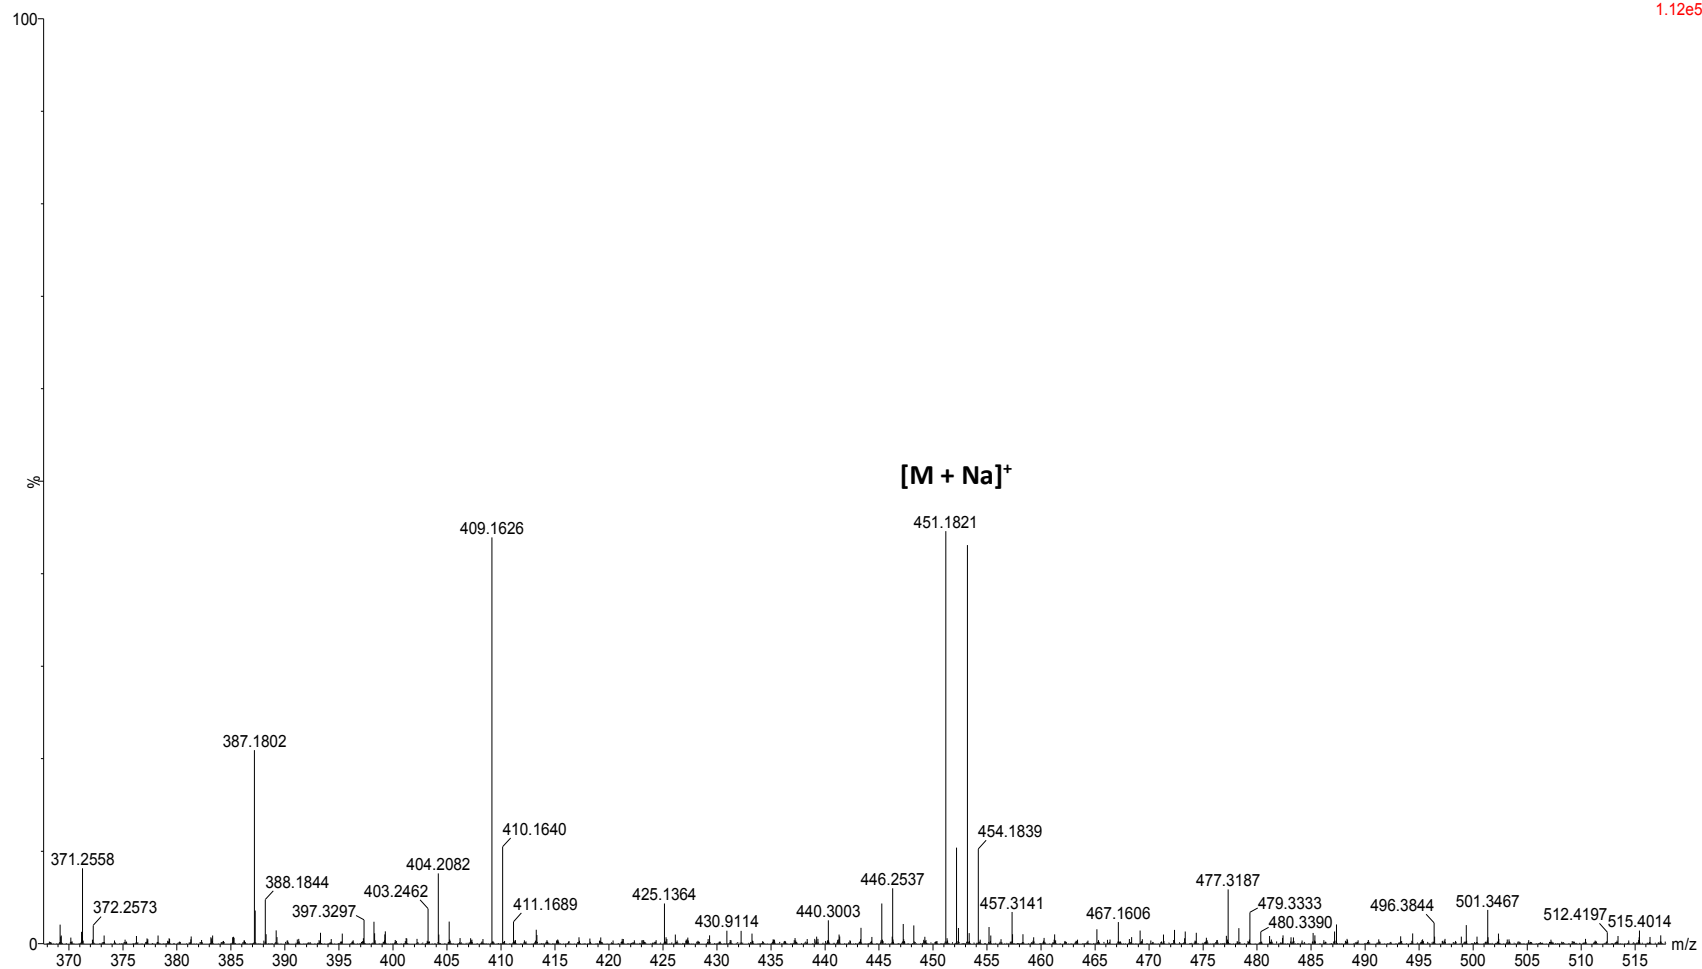

Figure S62. HR-ESI-MS spectrum of compound 3

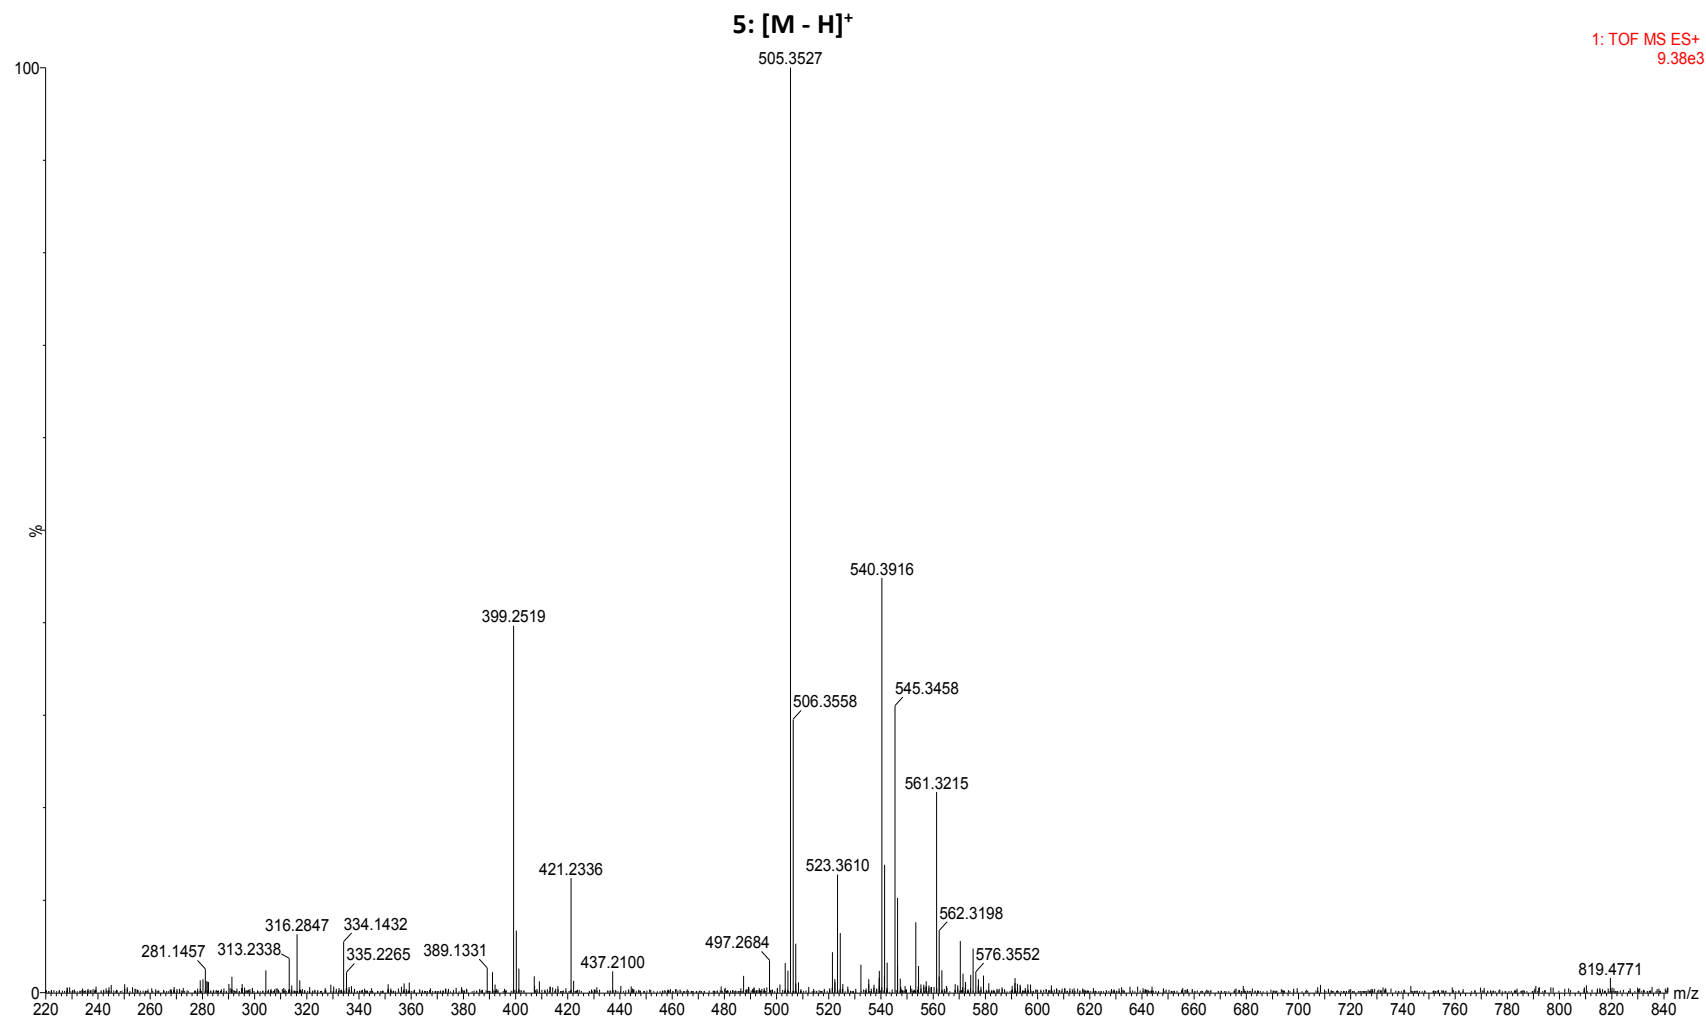

Figure S63. HR-ESI-MS spectrum of compound 5

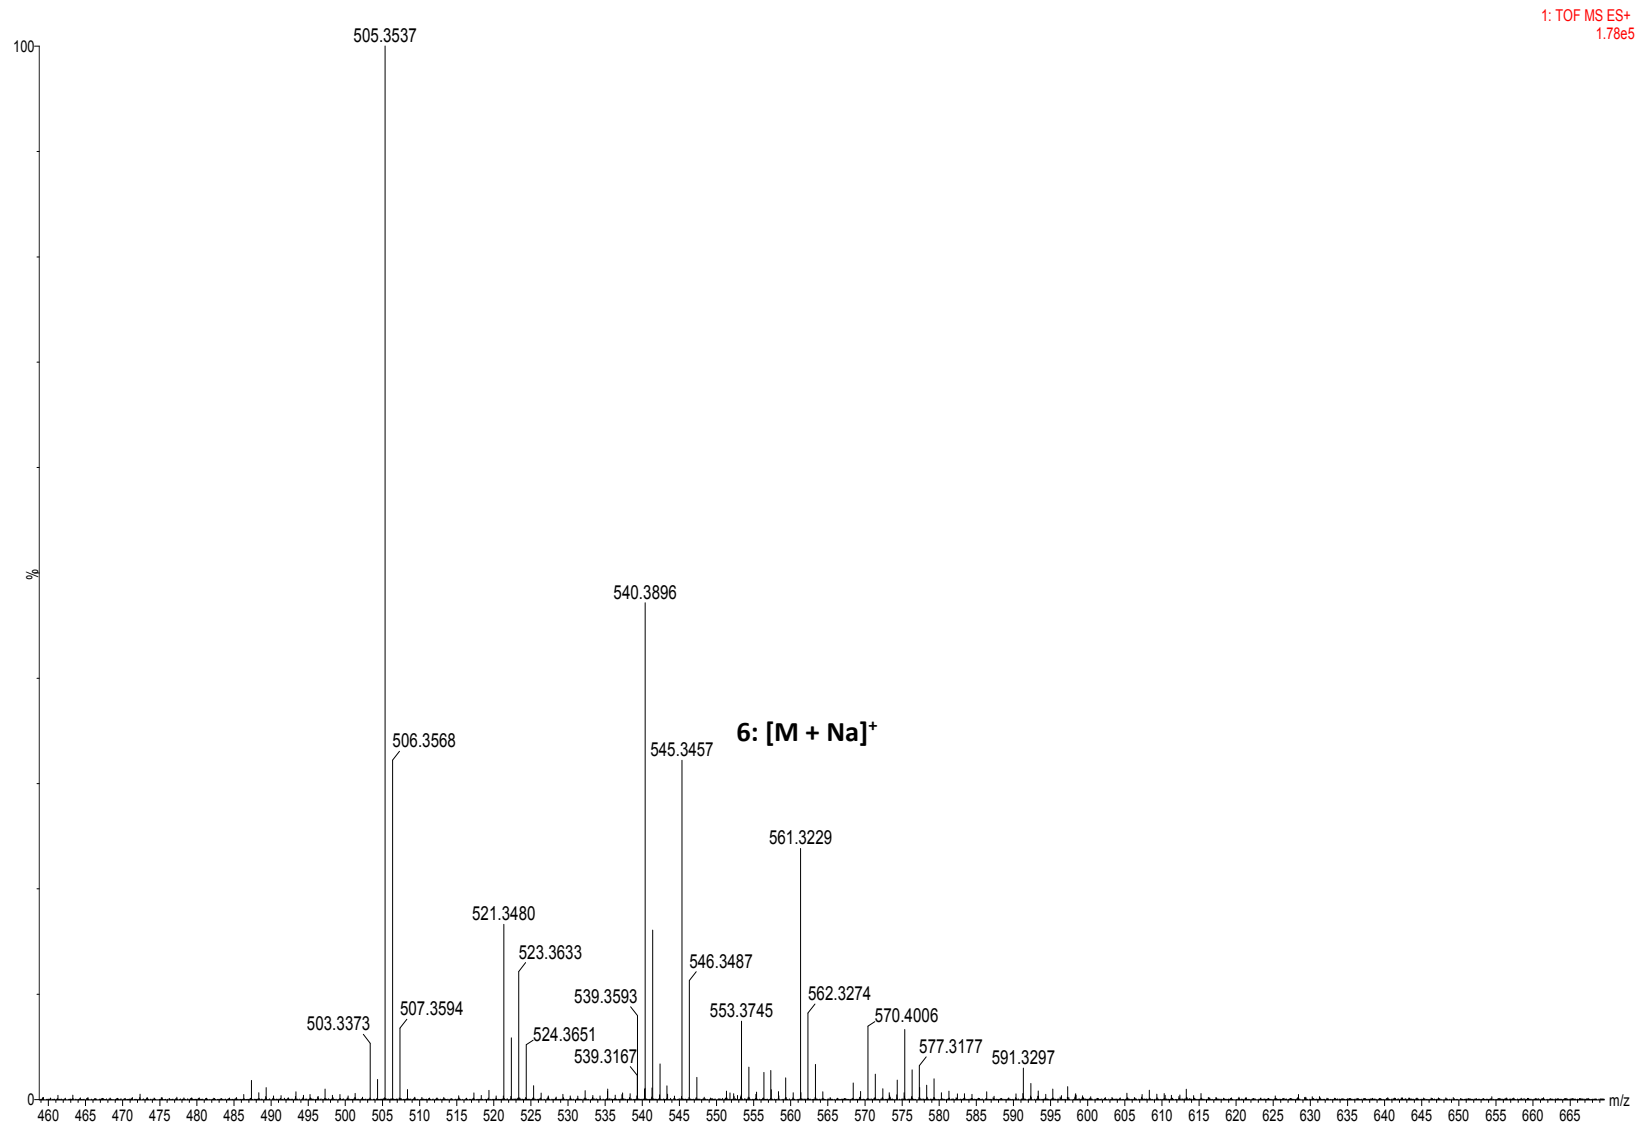

Figure S64. HR-ESI-MS spectrum of compound 6

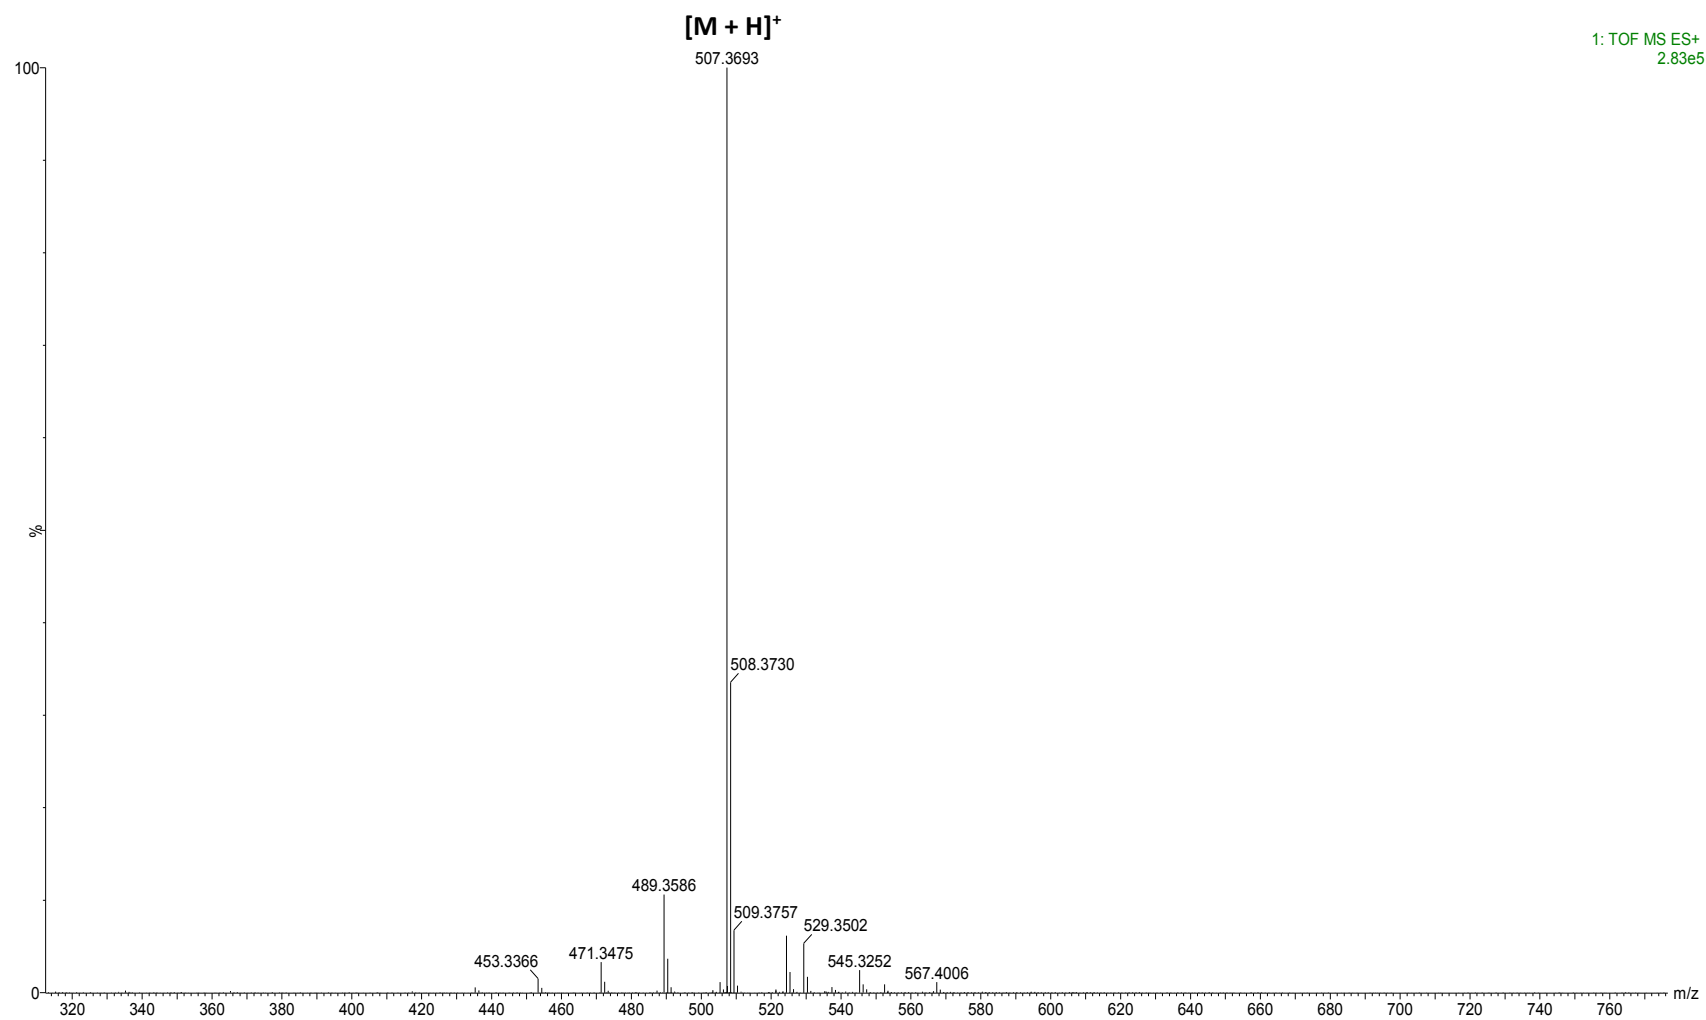

Figure S65. HR-ESI-MS spectrum of compound 7

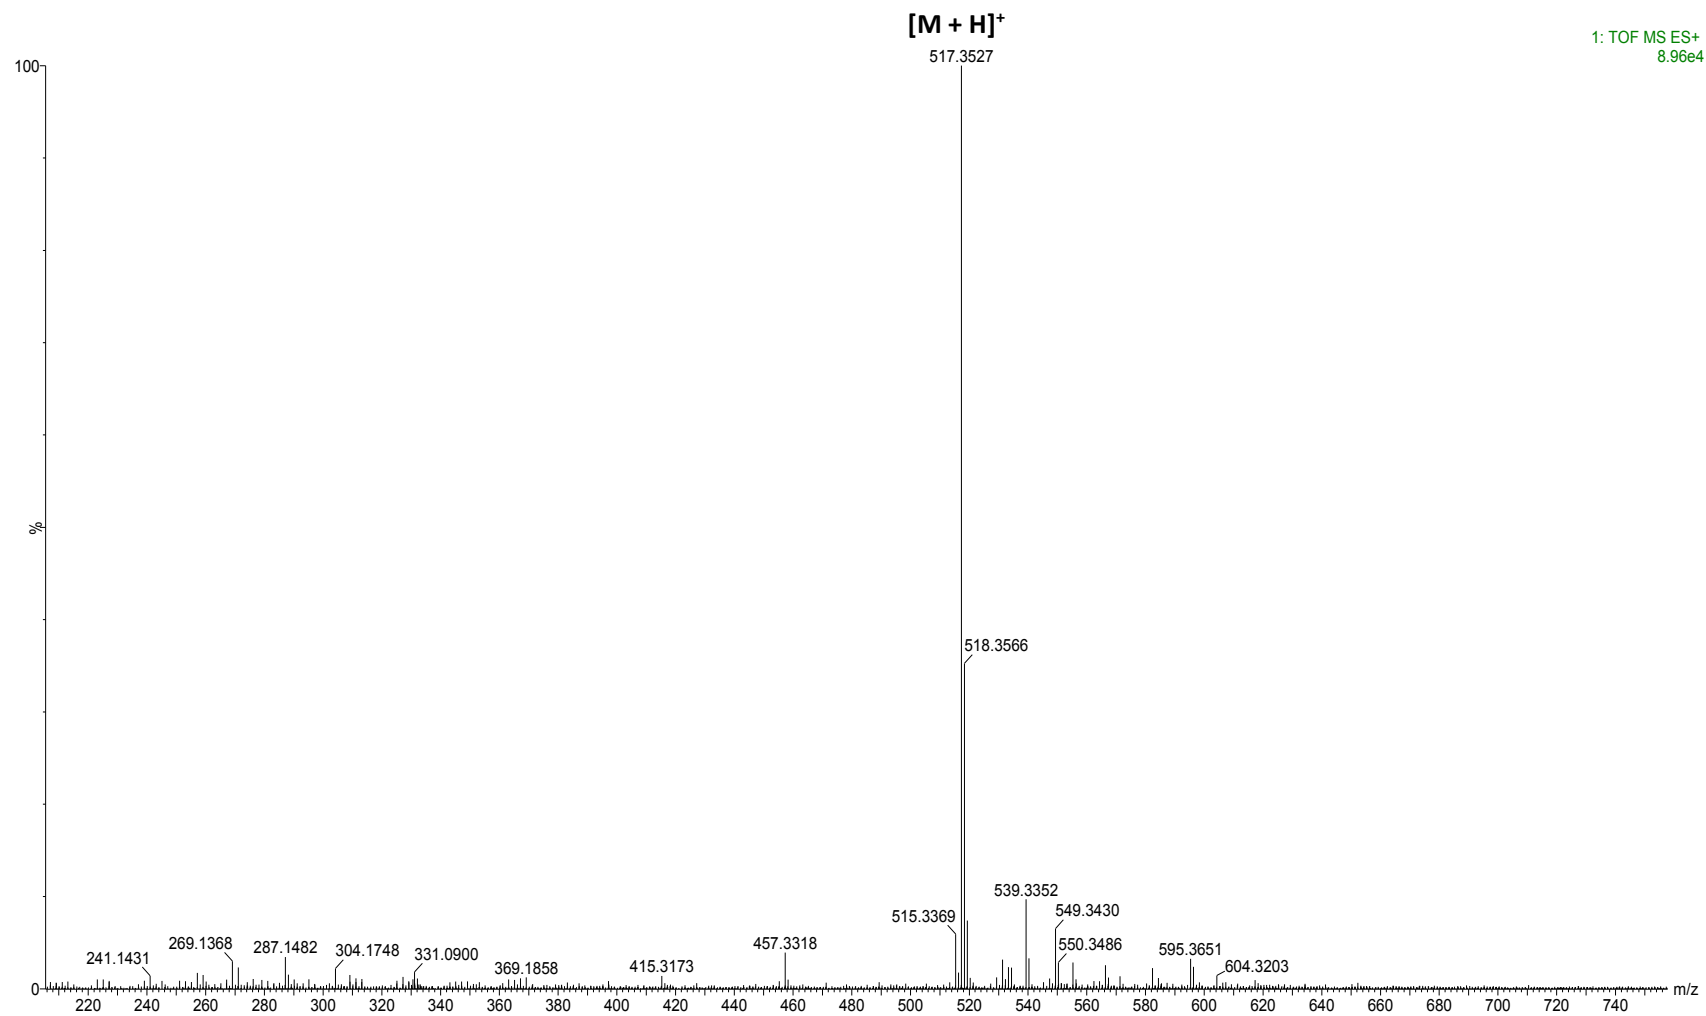

Figure S66. HR-ESI-MS spectrum of compound 8

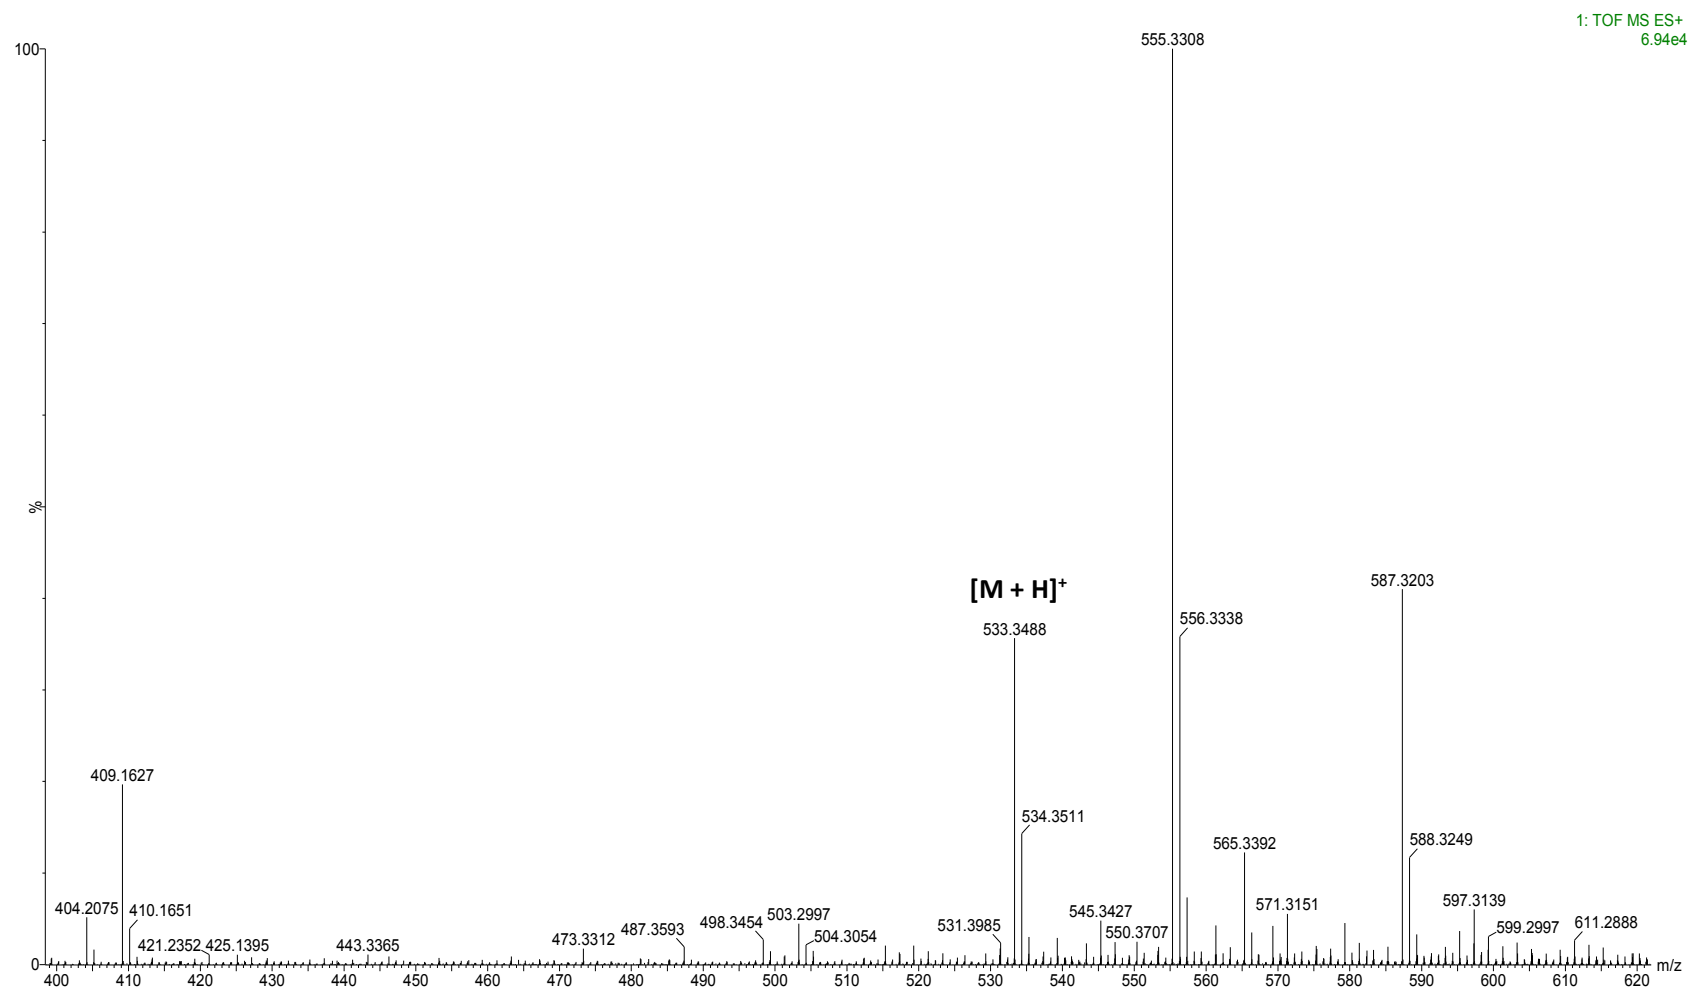

Figure S67. HR-ESI-MS spectrum of compound 9

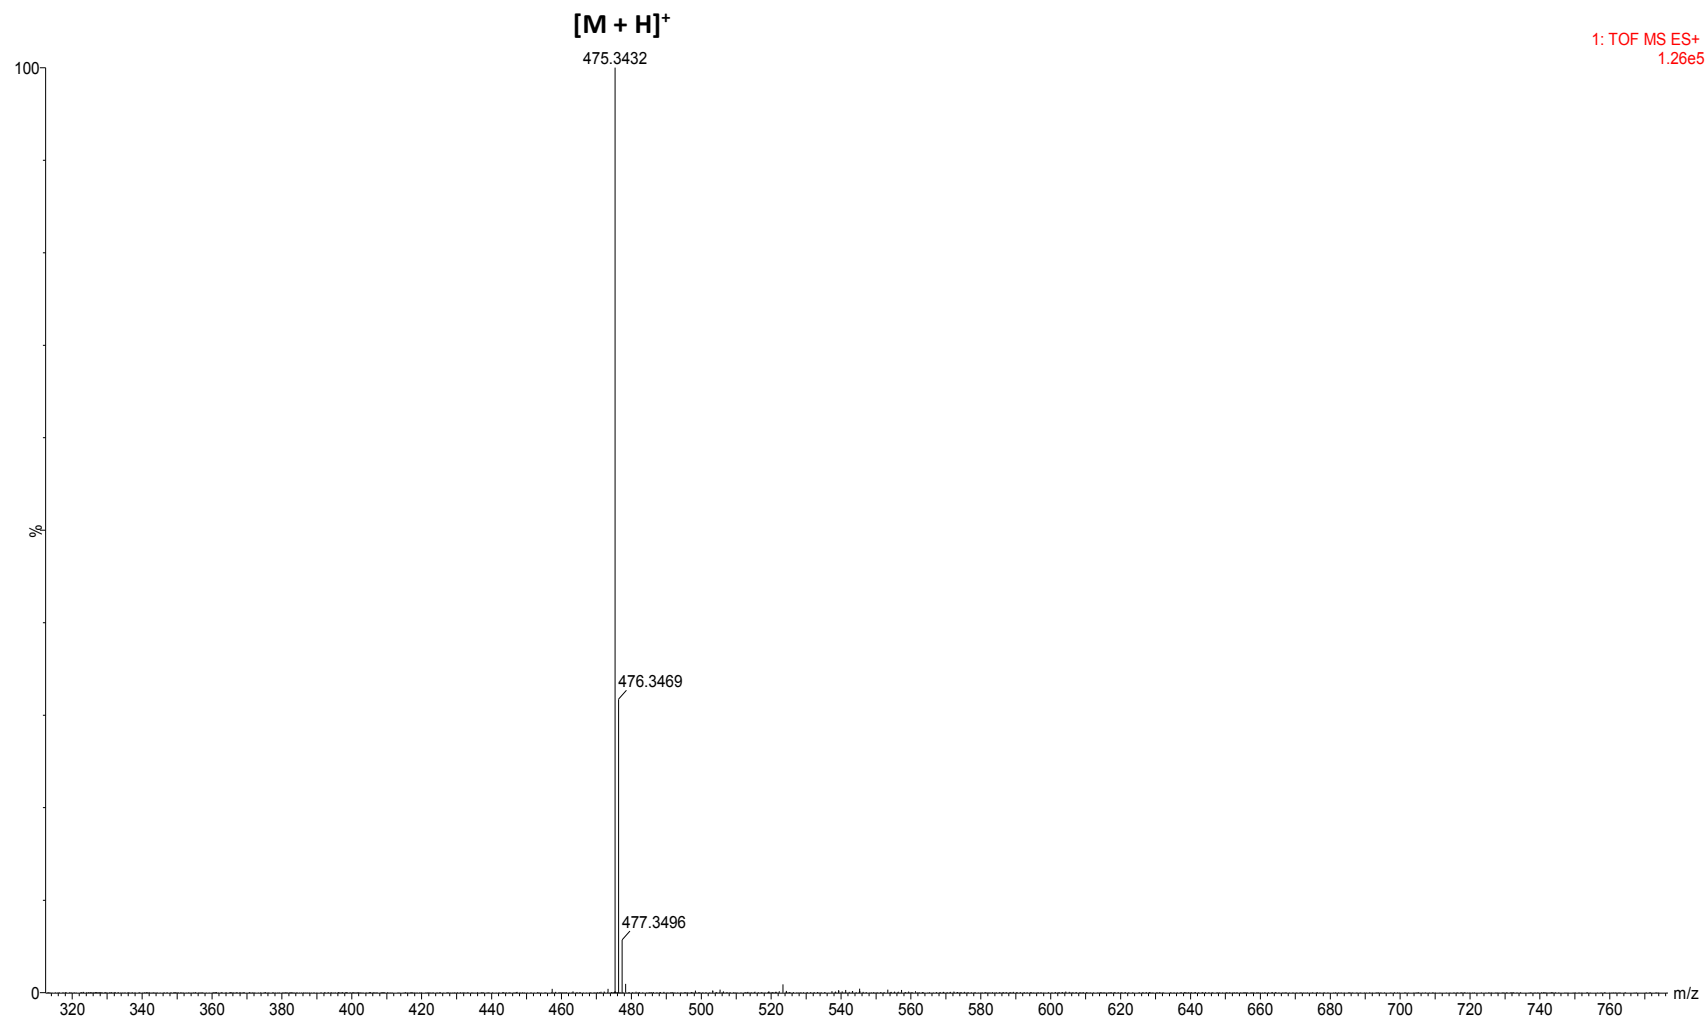

Figure S68. HR-ESI-MS spectrum of compound 10



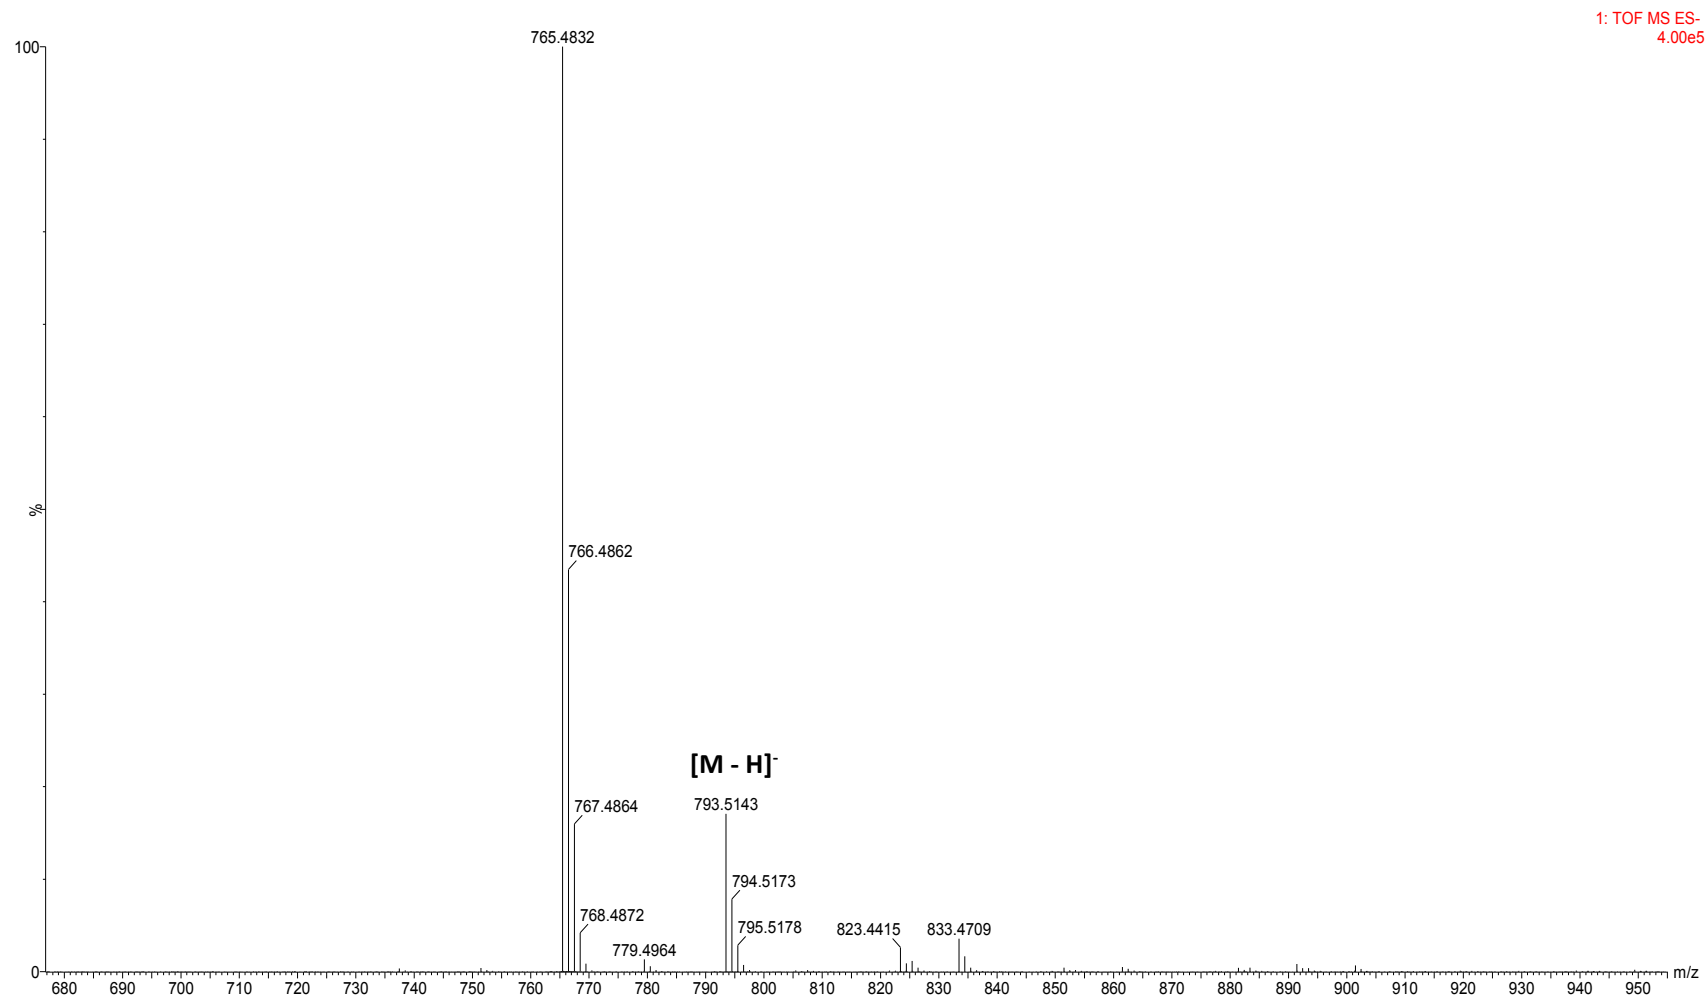

Figure S69. HR-ESI-MS spectrum of compound 11

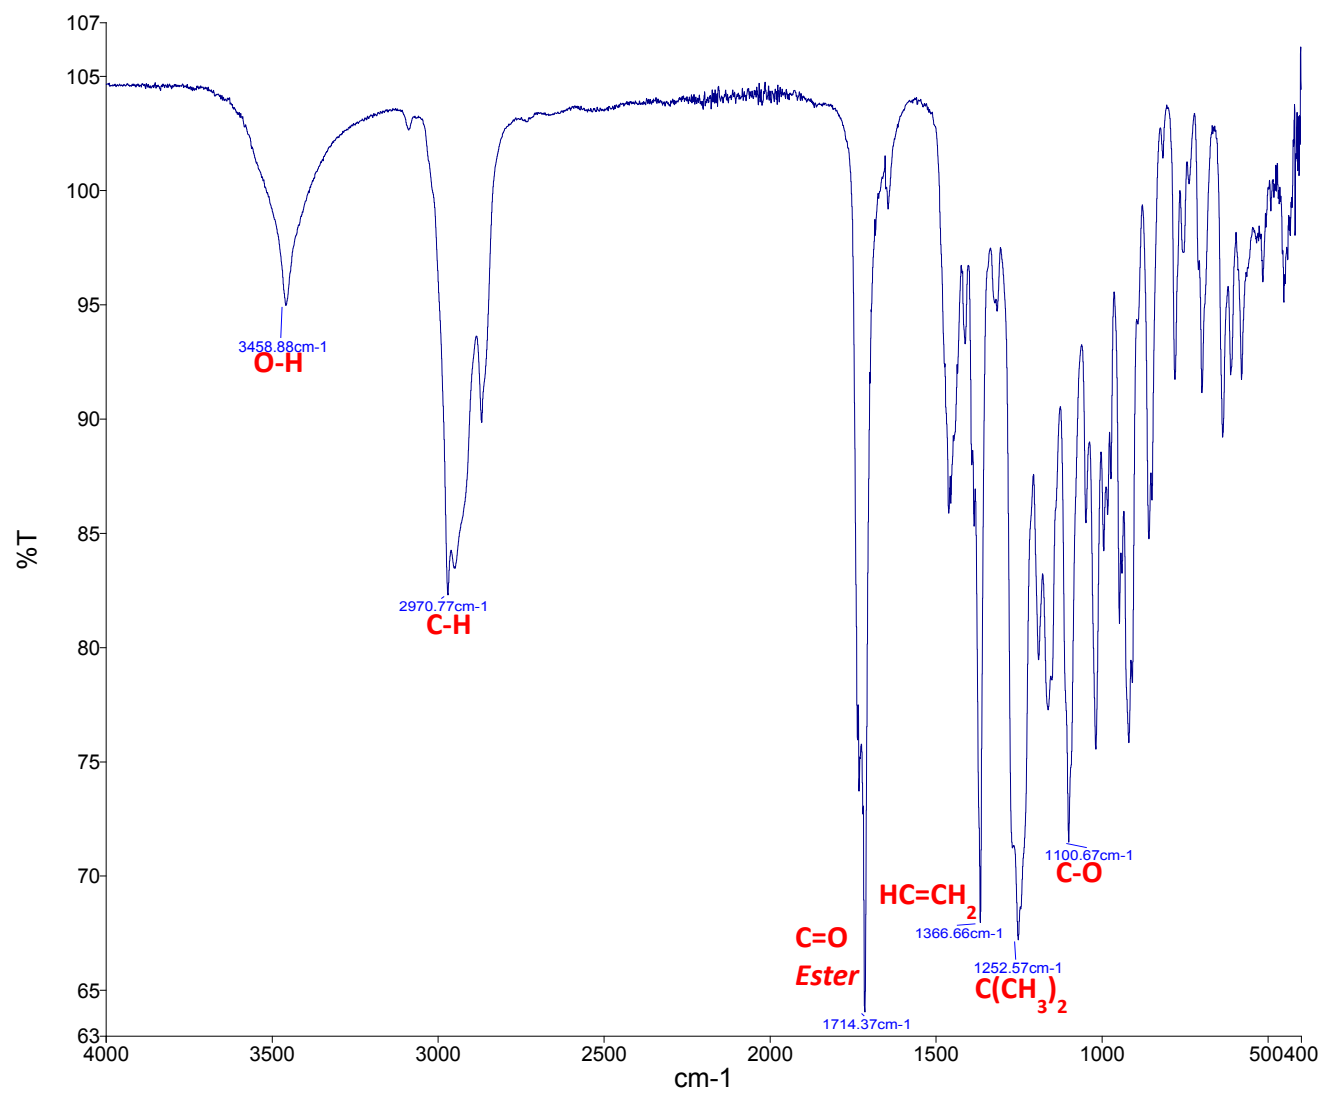

Figure S70. IR spectrum of compound 1

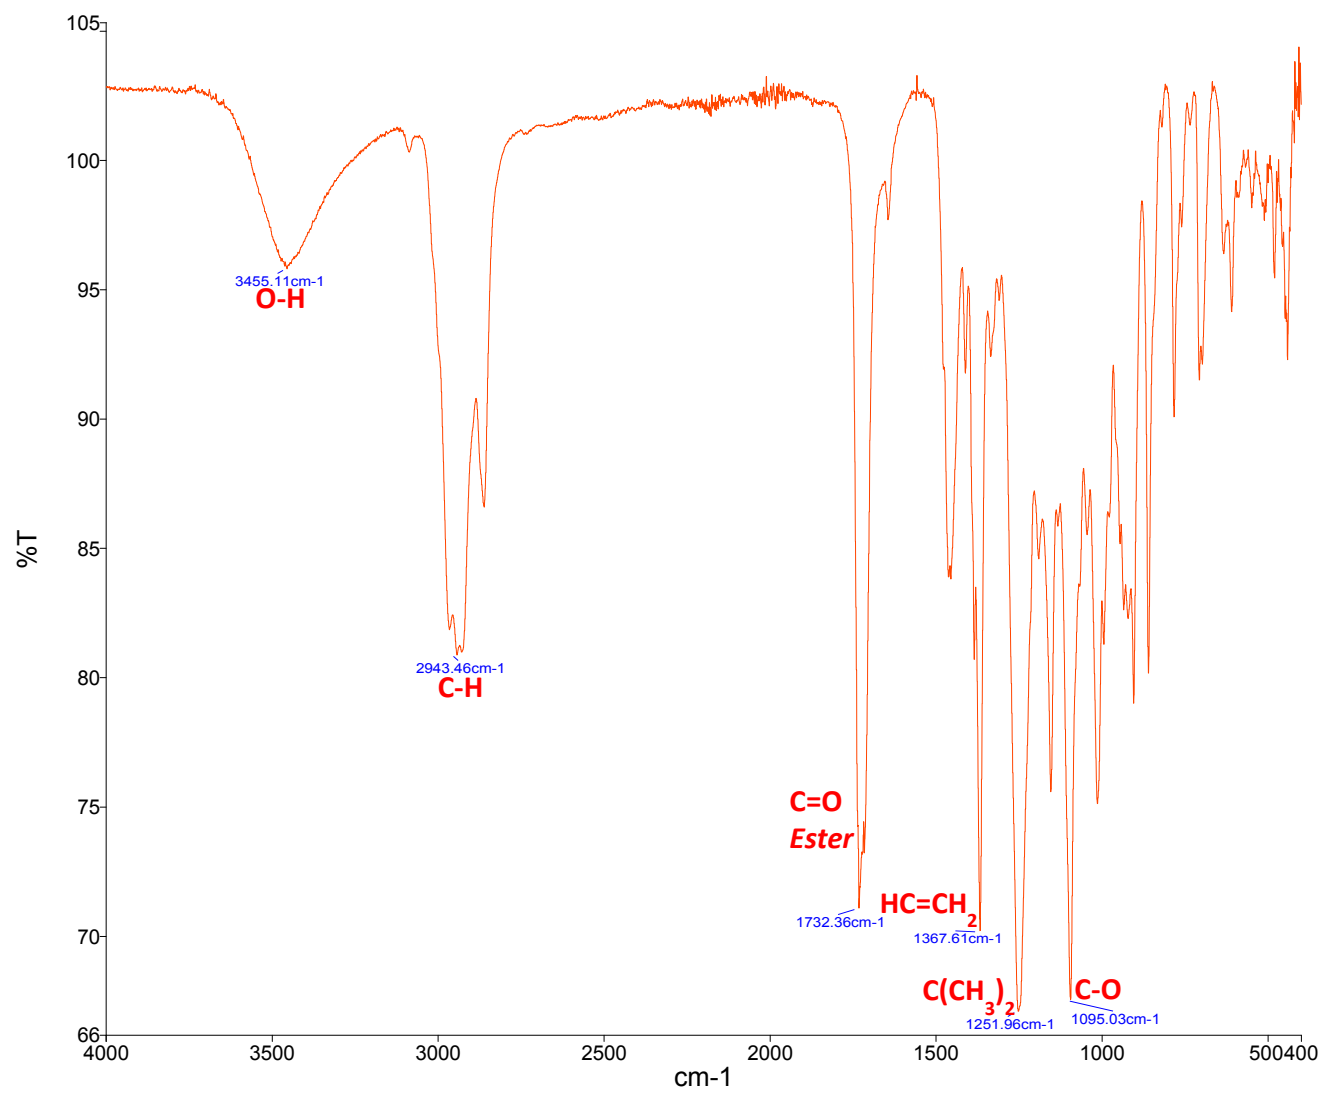

Figure S71. IR spectrum of compound 2

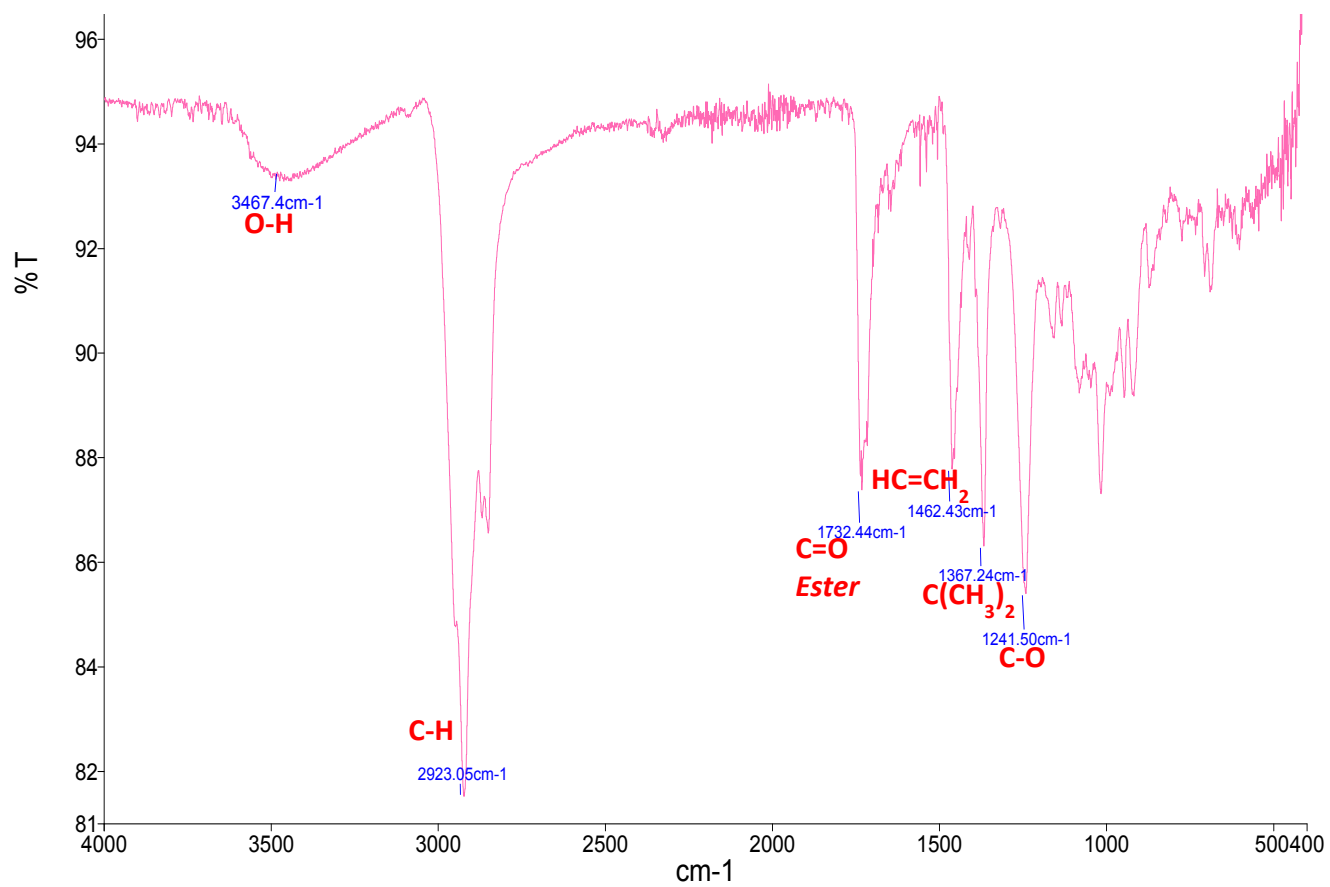

Figure S72. IR spectrum of compound 3

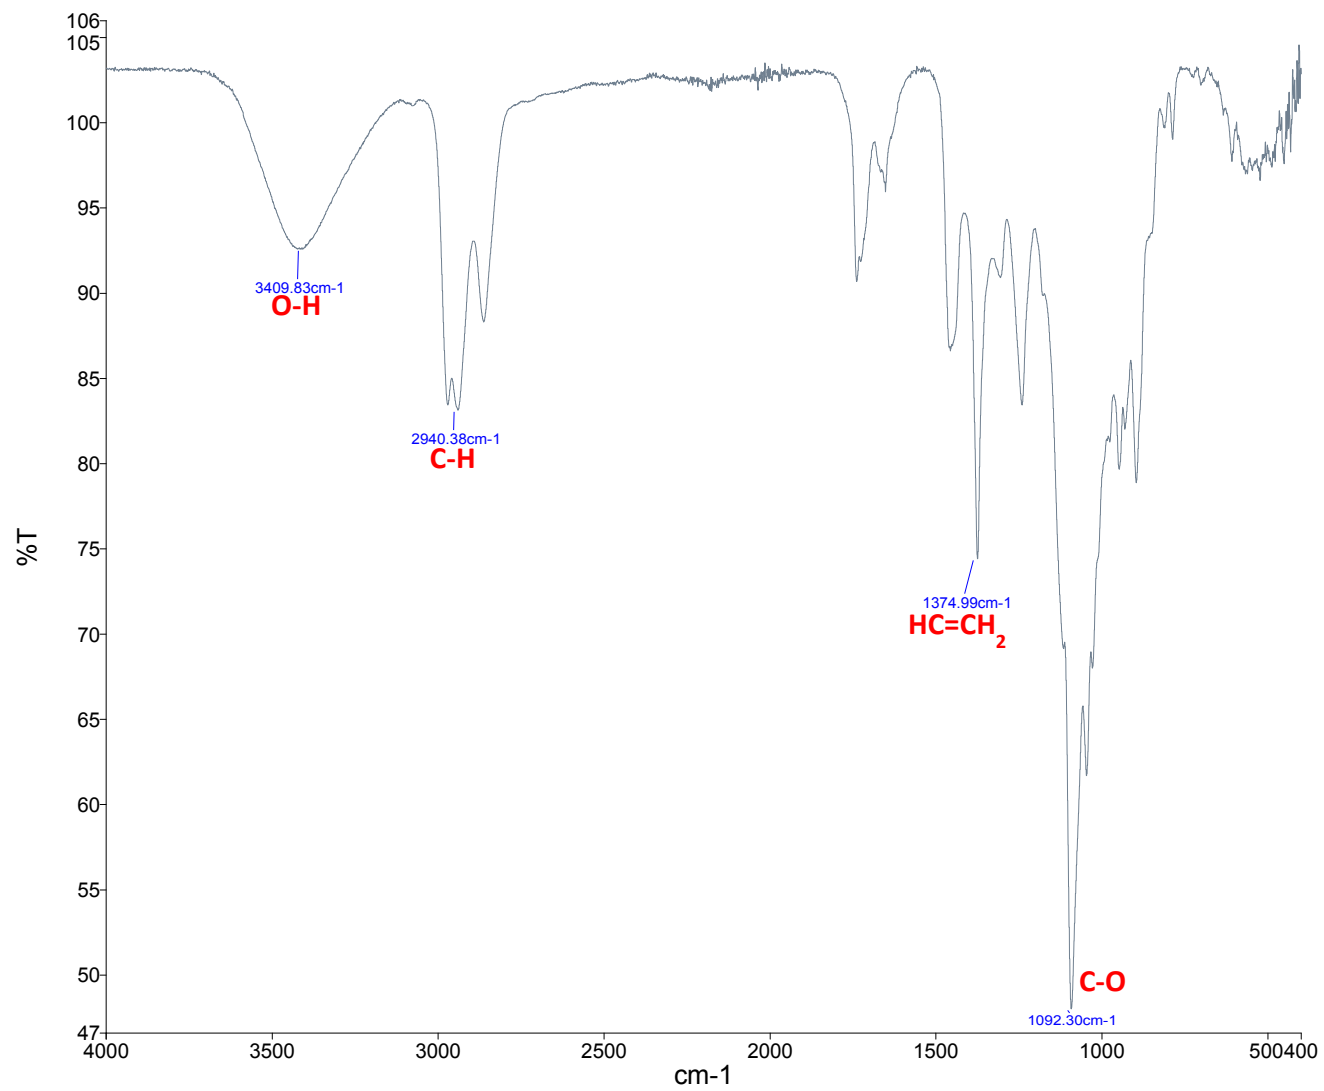

Figure S73. IR spectrum of compound 7

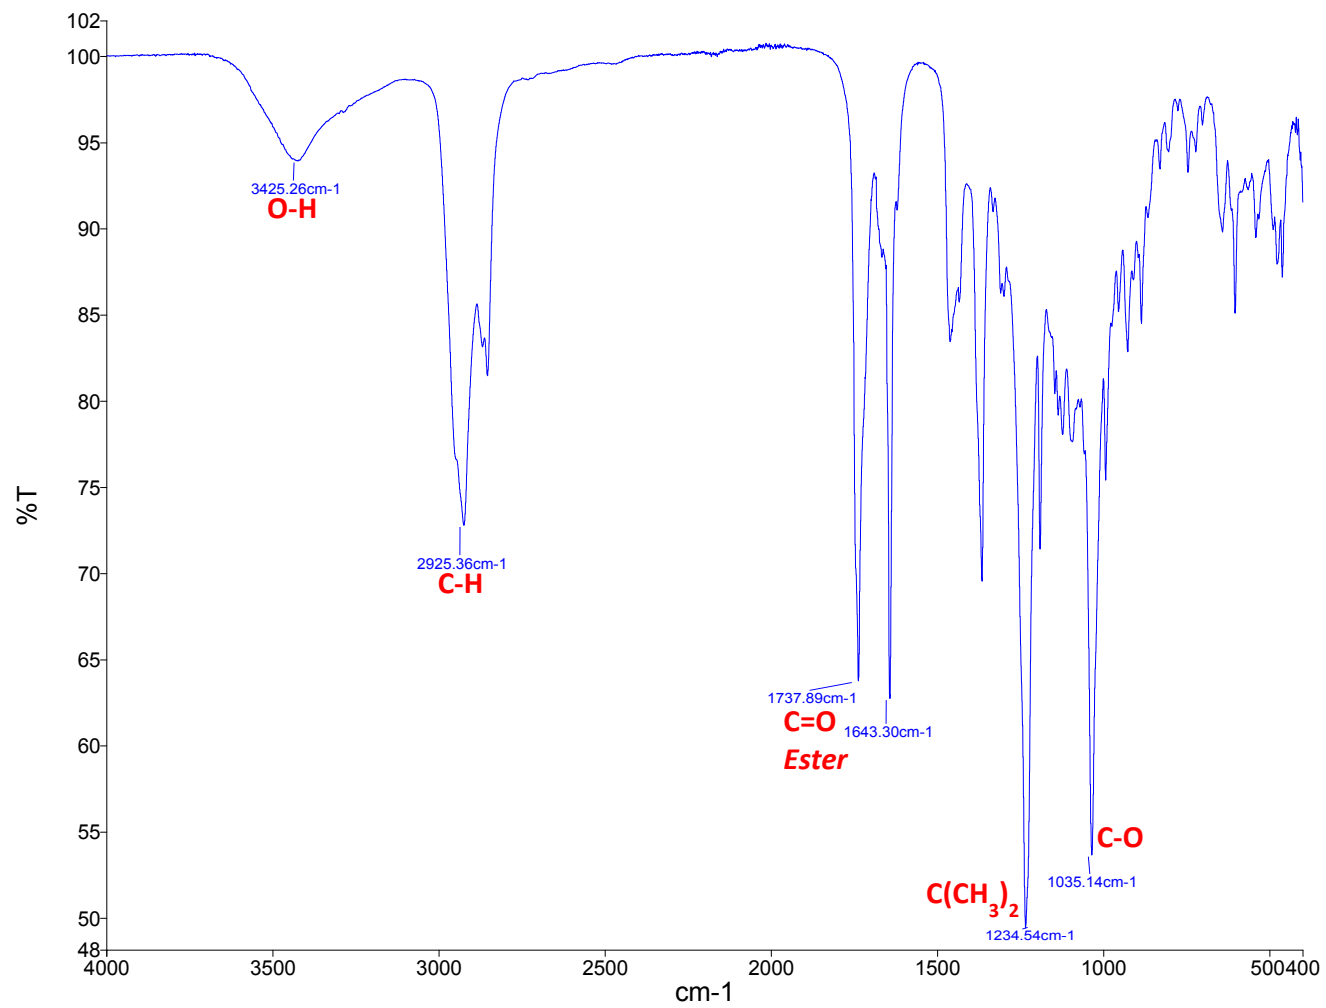

Figure S74. IR spectrum of compound 8

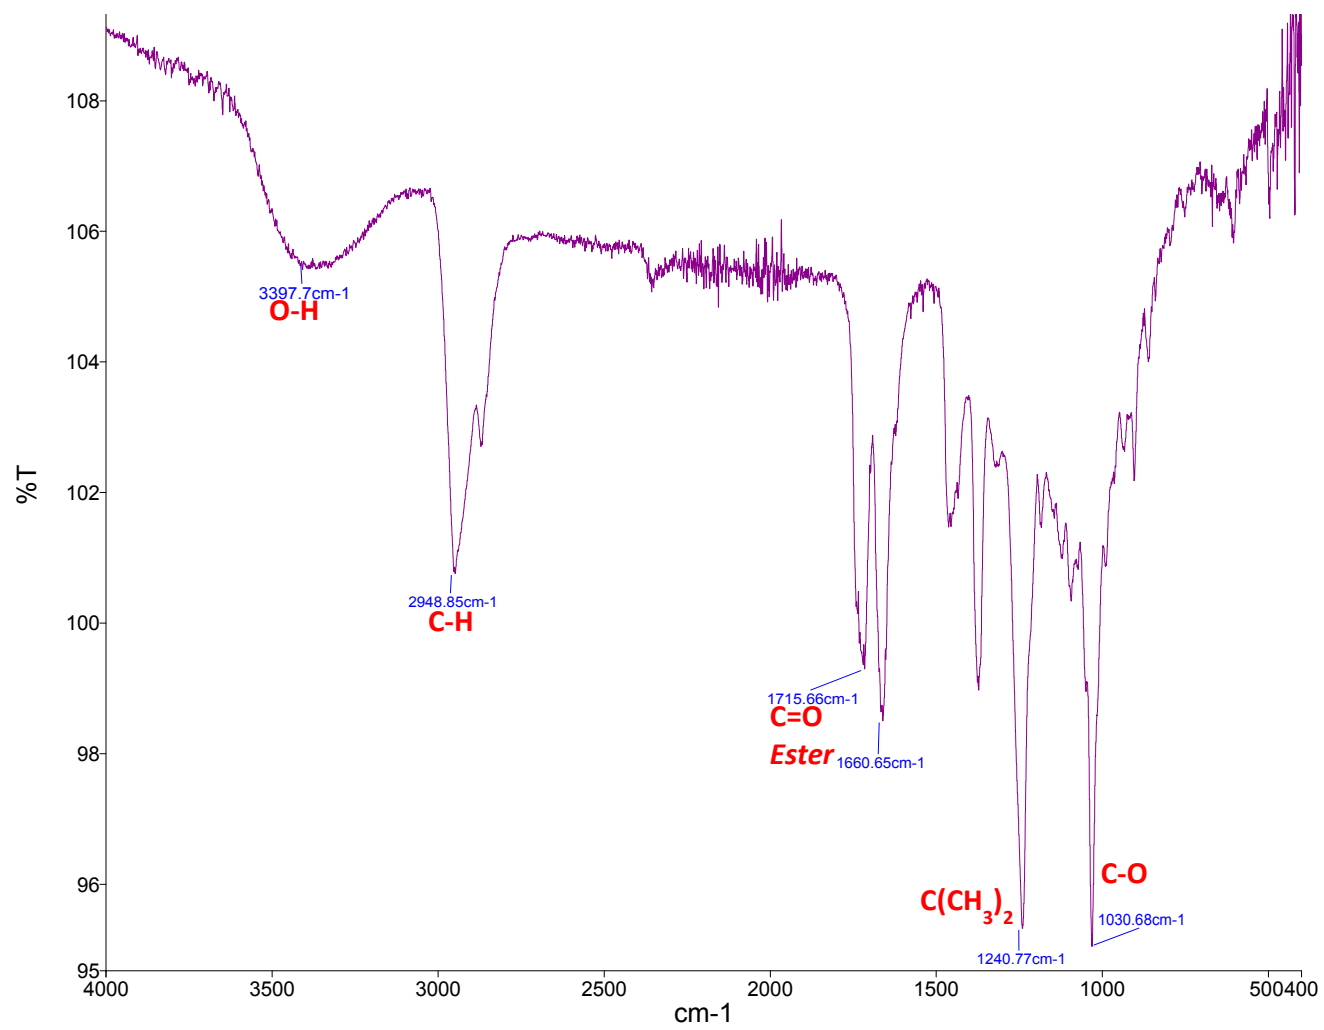

Figure S75. IR spectrum of compound 10

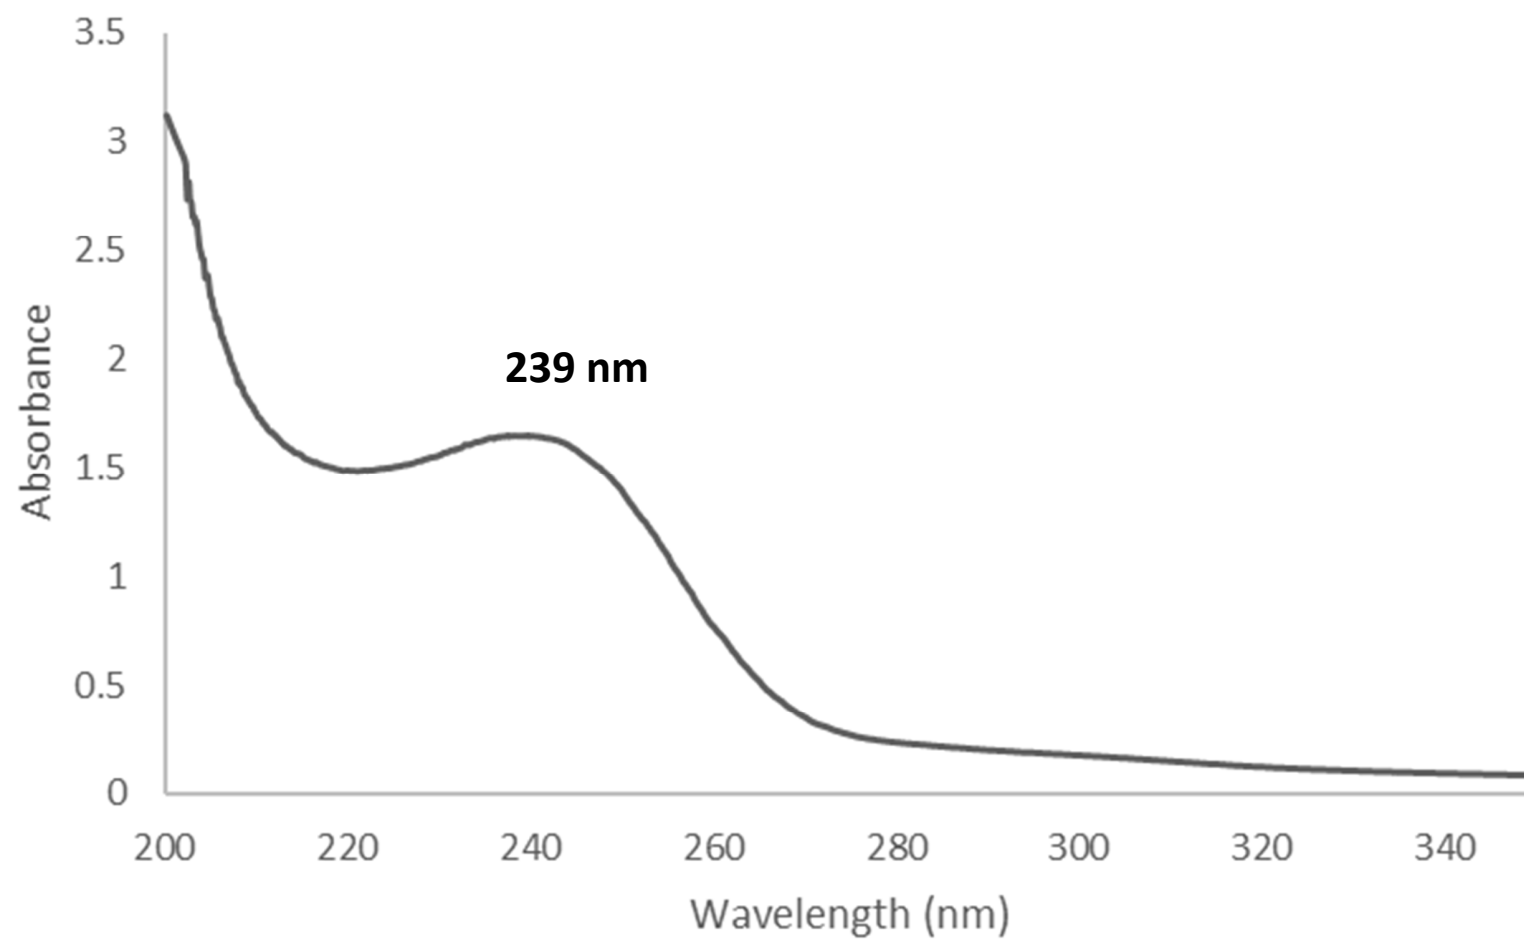

Figure S76. UV spectrum of compound 8



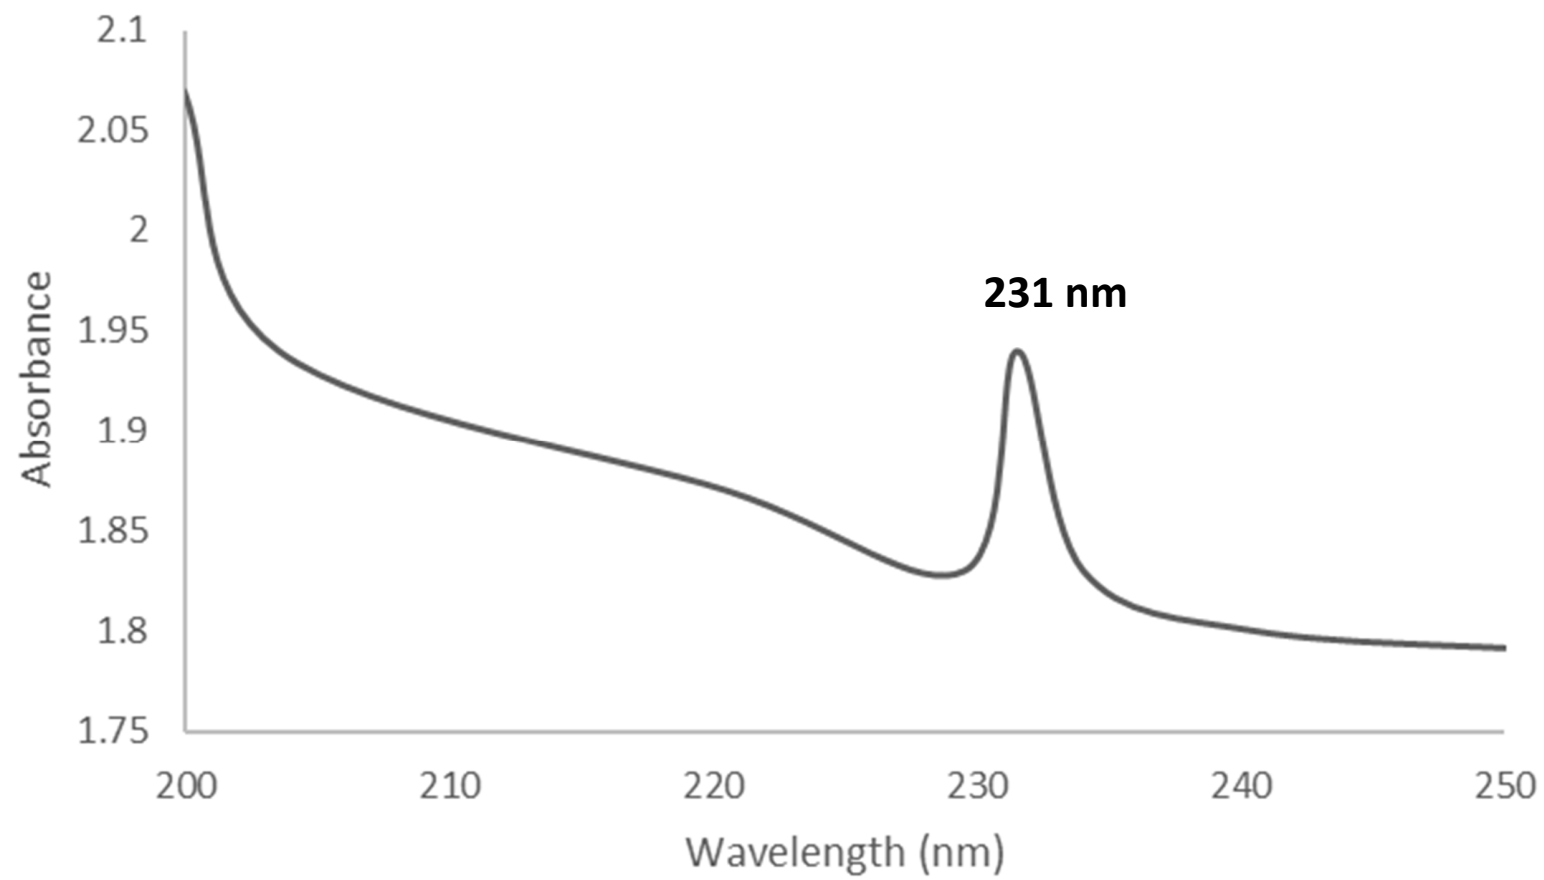

**Figure S77.** UV spectrum of compound **10**

**Table S1.** Cytotoxicity assay data for compounds **1 - 10**

| <b>Compound</b> | <b>MDA-MB-231</b>           |            |                      | <b>HeLa</b>                 |            |                      |
|-----------------|-----------------------------|------------|----------------------|-----------------------------|------------|----------------------|
|                 | <b>IC<sub>50</sub> (μM)</b> | <b>SEM</b> | <b>R<sup>2</sup></b> | <b>IC<sub>50</sub> (μM)</b> | <b>SEM</b> | <b>R<sup>2</sup></b> |
| <b>1</b>        | 26.3                        | 1          | 0.9952               | 30.2                        | 1.2        | 0.9309               |
| <b>2</b>        | 53.7                        | 1.2        | 0.8924               | 9.3                         | 1.3        | 0.9215               |
| <b>3</b>        | 58.5                        | 1.3        | 0.9756               | 42                          | 1.2        | 0.9346               |
| <b>4</b>        | 44.4                        | 1.1        | 0.9812               | 21.1                        | 1.1        | 0.9584               |
| <b>5 + 6</b>    | 13.5                        | 1.1        | 0.9883               | 46.4                        | 1.1        | 0.9822               |
| <b>7</b>        | 8.8                         | 5.6        | 0.9913               | 133.8                       | 1.1        | 0.9716               |
| <b>8</b>        | 27.6                        | 1.1        | 0.9748               | 25.6                        | 1.2        | 0.9304               |
| <b>9</b>        | 15.8                        | 1.1        | 0.9907               | 48.2                        | 3.3        | 0.9732               |
| <b>10</b>       | 21.6                        | 1.1        | 0.9797               | 43.5                        | 1.2        | 0.9213               |
